# Supplementary material for: The impact of maternal serum biomarkers on maternal and neonatal outcomes in twin pregnancies: a retrospective cohort study conducted at a tertiary hospital
Source: PeerJ journal article supplement (doi:10.7717/peerj.18415), 2024-10-28
Supplement: DataS1.docx [file DataS1.docx]

**The definitions of secondary outcomes**

**Secondary maternal outcomes:**

1. Postpartum hemorrhage or blood transfusion: blood loss≥500ml in vaginal delivery or blood loss≥1000ml in cesarean delivery or blood transfusion during hospitalization
2. Admission to intensive care unit: required to stay in intensive care unit
3. Chorioamnionitis or postpartum infection: inflammation of the amnio chorionic membrane or required to receive antibiotic＞72 hours or required to receive second-line antibiotics after delivery.

**Secondary neonatal outcomes:**

1. Neonatal asphyxia: Apgar score≤7 points at 1 or 5 minutes after delivery
2. Ventilator support: required to receive ventilator support
3. Neonatal hypoglycemia: required to receive intravenous glucose
4. Sepsis: a serious condition that happens when the body’s immune system has an extreme response to an infection.
5. Blood transfusion: blood transfusion during hospitalization
6. Hemorrhage: hemorrhage in brain, lung, gastrointestinal tract and so on
