# Supplementary material for: The impact of maternal serum biomarkers on maternal and neonatal outcomes in twin pregnancies: a retrospective cohort study conducted at a tertiary hospital
Source: PeerJ journal article supplement (doi:10.7717/peerj.18415), 2024-10-28
Supplement: FigS2.pdf [file FigS2.pdf]

Fig. S2. Time-event analyses of the timing of PE onset among the various subgroups of variables in the multivariate logistic regression model

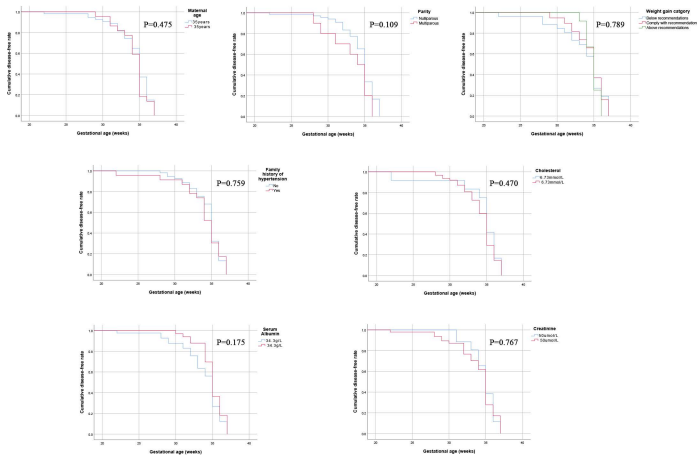

The cut-off age was established at 35 years, while for other continuous variables, the median value was utilized as the cut-off point.
