# Supplementary material for: The impact of maternal serum biomarkers on maternal and neonatal outcomes in twin pregnancies: a retrospective cohort study conducted at a tertiary hospital
Source: PeerJ journal article supplement (doi:10.7717/peerj.18415), 2024-10-28
Supplement: Raw_data.xlsx [file Raw_data.xlsx]

## Sheet: Sheet1
Year	Gravidity	Parity	Interval from last pregnancy	Occupation	Mode of conception	Chorionicity	Admission gestational age	Gestational weight gain	Gestational diabetes mellitus	Need to control blood sugar	History of autoimmune disease	Family history of hypertension	Highest level of education	Height	Pre-pregnancy weight	Pre-pregnancy BMI	Red blood cell, 10^12/L	Platelet, 10^9/L	Hemoglobin, g/L	Hematocrit	Cholesterol, mmol/L	Blood triglyceride, mmol/L	Serum Albumin, g/L	Uric acid, umol/L	Creatinine, umol/L	Alanine aminotransferase, U/L	Lactate dehydrogenase, U/L	Corticosteroid treatment for fetal maturation	Aspirin prescribed during pregnancy	Pregnancy induced hypertension/preeclampsia	Preeclampsia	Gestational age at the onset of PE	Highest systolic blood pressure	Highest diastolic blood pressure	Proteinuria (g/24 h)	Delivery gestational age	Delivery method	Indications for cesarean section	Postpartum hemorrhage/transfusion	Admission to intensive care unit	Chorioamnionitis or postpartum infection	Fetal death	Weight for fetal A	Weight for fetal B	Fetal sex	Neonatal asphyxia	Neonatal death	Admission to NICU	Hypoglycemia
35Year	3	0		having work	ART	Dichorionic	34	17	Yes	Diet	No	No	Junior college	161	70	20.7	4.16	225	140	0.407	7.23	3.15	30.2	219	55	10	152	Yes	No	Yes	Yes	34	146	95	1282	35	cesarean section	severe preeclampsia	No	No	No	No	2600	2600	XY	No	No	One baby had admission to NICU	No
36Year	2	0		no work	ART	Dichorionic	34	18.5	Yes	Diet	No	No	Undergraduate course	163	69.2	19	3.66	237	115	0.354	9.69	5.23	34.2	246	58	6	173	Yes	No	No	No					35	cesarean section	twin pregnancy	Yes	Yes	No	No	2850	3070	YY	No	No	No	No
34Year	1	0		having work	ART	Dichorionic	36	18	Yes	Diet	No	Yes	Junior college	158	91.2	29.2	4.06	241	126	0.367	7	4.93	34.1	303	58	6	155	No	No	No	No					37	cesarean section	twin pregnancy	No	No	No	No	2650	2800	XY	No	No	No	No
31Year	1	0		having work	ART	Dichorionic	37	13	Yes	Diet	No	No	Junior college	157	65	21	3.63	193	108	0.338	5.06	2.15	36.4	245	60	22	122	No	No	No	No					37	cesarean section	twin pregnancy	No	No	No	No	1920	2420	XY	No	No	One baby had admission to NICU	No
31Year	1	0		having work	ART	Dichorionic	35	15	Yes	Diet	No	Yes	Undergraduate course	158	70	22												No	Yes	Yes	Yes	35	159	107	488	35	cesarean section	severe preeclampsia	No	Yes	Yes	No	1930	2300	YY	No	No	Two babies had admission to NICU	One baby had
29Year	2	0		having work	Spontaneous	Monochorionic	33	12	Yes	Diet	No	No	Undergraduate course	160	72	23.4	3.49	240	110	0.333	6.45	4.09	33.5	340	72	11	144	Yes	No	No	No					34	cesarean section	Severe ICP	No	No	No	No	2400	1980	XX	No	No	One baby had admission to NICU	No
31Year	1	0		having work	Spontaneous	Dichorionic	36	13.5	Yes	Diet	No	No	Undergraduate course	153	65.5	22.2	3.75	200	118	0.363	6.62	2.62	35.3	241	55	32	144	No	No	No	No					37	cesarean section	twin pregnancy	No	No	No	No	2450	2190	XY	No	No	One baby had admission to NICU	No
35Year	7	1	16	having work	Spontaneous	Dichorionic	36	14.5	Yes	Diet	No	No	Middle school	156	76	25.2					6.91	3.46	32.7	247	61	15	134	No	No	Yes	Yes	35	163	99	2628	34	cesarean section	severe preeclampsia	No	Yes	No	No	1615	2000	XY	No	No	Two babies had admission to NICU	No
29Year	3	0		having work	ART	Dichorionic	36	20	Yes	Diet	No	No	Undergraduate course	165	77.5	20.2	3.72	204	117	0.354	9.5	3.11	34.8	308	49	15	163	Yes	No	No	No					36	cesarean section	oligohydramnios	No	No	No	No	2420	2650	XX	No	No	No	No
35Year	5	2	4	no work	Spontaneous	Dichorionic	36	14	Yes	Diet	No	No	Undergraduate course	153	69	23.9	3.81	210	133	0.395	6.66	3.97	32.5	226	50	36	168	No	No	No	No					36	cesarean section	twin pregnancy	No	No	No	No	2490	2360	YY	No	No	No	No
31Year	1	0		having work	Spontaneous	Dichorionic	33	9.1	Yes	Diet	No	No	Junior college	152	59.6	22.4	3.38	190	107	0.322	6.34	3.04	31.1	298	56	13	168	Yes	No	No	No					34	cesarean section	Severe ICP	No	No	No	No	1360	1750	XY	No	No	Two babies had admission to NICU	One baby had
29Year	2	1	4	no work	Spontaneous	Dichorionic	35	12	Yes	Diet	No	No	Junior college	163	66	20.3												No	No	No	No					35	cesarean section	twin pregnancy	No	No	No	No	2400	2270	XX	No	No	Two babies had admission to NICU	No
33Year	2	0		having work	ART	Dichorionic	35	11	Yes	Diet	No	No	Undergraduate course	160	76	25.3	3.78	232	113	0.348	8.55	3.34	33.4	254	60	10	186	No	No	No	No					35	cesarean section	twin pregnancy	No	No	No	No	2330	2480	XX	No	No	Two babies had admission to NICU	No
30Year	1	0		having work	ART	Dichorionic	36	30	Yes	Diet	No	No	Junior college	163	97	26.9	3.61	232	90	0.293	5.41	2.34	33.5	245	60	9	142	No	No	Yes	No					36	cesarean section	twin pregnancy	No	No	No	No	2850	2700	XX	No	No	One baby had admission to NICU	No
27Year	2	1	3	having work	Spontaneous	Monochorionic	35	17	Yes	Diet	No	No	Undergraduate course	163	73	21												No	No	No	No					35	cesarean section	Fetal distress	No	No	No	No	2900	2210	YY	No	No	One baby had admission to NICU	No
29Year	4	0		no work	ART	Dichorionic	29	3.3	Yes	Diet	No	No	Junior college	164	63.3	22.3	3.35	287	104	0.314	7.73	2.59	36.1	240	59	16	134	Yes	No	No	No					29	cesarean section	twin pregnancy	No	No	No	No	1410	1470	XY	Two babies had	No	Two babies had admission to NICU	No
40Year	1	0		having work	ART	Dichorionic	37	18.5	Yes	Diet	No	No	polytechnic school	158	73.5	21.4	3.49	148	102	0.314	6.81	3.72	34.5	218	48	12	150	No	Yes	No	No					37	cesarean section	twin pregnancy	No	No	No	No	2800	2930	XY	No	No	No	No
29Year	2	0		having work	Spontaneous	Dichorionic	35	13	Yes	Diet	No	No	Junior college	158	83	28	4.84	164	146	0.439	5.08	2.96	33.6	256	43	16	164	Yes	No	No	No					35	cesarean section	twin pregnancy	No	No	No	No	2420	2110	XX	No	No	Two babies had admission to NICU	One baby had
33Year	3	1	1	no work	ART	Dichorionic	37	13.8	Yes	Diet	No	No	Undergraduate course	157	62.2	19.6												No	No	No	No					37	cesarean section	twin pregnancy	No	No	No	No	2700	2530	YY	No	No	No	No
28Year	1	0		having work	ART	Dichorionic	31	12.5	Yes	Diet	No	Yes	Undergraduate course	160	64.5	20.3	3.94	311	119	0.362	8.15	6.2	31.2	112	43	17	168	Yes	No	No	No					31	cesarean section	twin pregnancy	No	No	No	No	1800	1650	XY	One baby had	No	Two babies had admission to NICU	No
32Year	2	0		having work	Spontaneous	Monochorionic	32	6.7	Yes	Diet	No	No	Undergraduate course	150	56.7	22.2	3.29	152	102	0.309	6.39	2.8	36.1	236	46	17	148	Yes	No	No	No					33	cesarean section	twin pregnancy	No	No	No	No	1900	1730	XX	No	No	Two babies had admission to NICU	Two babies had
33Year	3	0		having work	ART	Dichorionic	36	12.5	Yes	Diet	No	No	Junior college	156	71.8	24	3.65	226	117	0.348	4.99	3.68	35.8	346	56	6	162	No	No	No	No					36	cesarean section	twin pregnancy	No	No	No	No	2340	2340	XY	Two babies had	No	Two babies had admission to NICU	No
33Year	1	0		having work	ART	Dichorionic	37	14	Yes	Diet	No	No	Undergraduate course	158	73.8	23.9	4.16	200	136	0.4	6.59	4.95	37.2	289	56	11	138	Yes	No	No	No					37	cesarean section	twin pregnancy	No	No	No	No	2460	2350	XY	No	No	No	No
33Year	2	1	11	having work	Spontaneous	Dichorionic	36	18	Yes	Diet	No	No	Middle school	151	68	21.9	3.67	220	112	0.344	6.25	3.53	33.8	258	44	9	128	No	No	Yes	Yes	36	143	92	708	36	cesarean section	preeclampsia，twin pregnancy	No	No	No	No	2300	2200	XY	No	No	One baby had admission to NICU	No
28Year	2	0		having work	ART	Dichorionic	37	20	Yes	Diet	No	No	Junior college	162	70.9	19.3	3.65	118	120	0.379	5.65	2.25	37.4	280	49	12	156	No	No	No	No					37	cesarean section	twin pregnancy	No	No	No	No	2880	2590	XY	No	No	No	No
27Year	1	0		having work	Spontaneous	Dichorionic	37	9.8	Yes	Diet	No	Yes	Undergraduate course	155	55.8	19.1	4.12	279	92	0.293	5.85	2.73	35.4	262	53	6	149	No	No	No	No					37	cesarean section	twin pregnancy	No	No	No	No	2500	2500	YY	No	No	No	No
26Year	2	0		having work	ART	Dichorionic	34	7.9	Yes	Diet	No	Yes	Junior college	155	63.1	23.3	3.91	172	122	0.371	5.91	4.34	35.8	248	55	9	140	No	No	No	No					34	cesarean section	twin pregnancy	No	No	No	No	2200	2400	XY	No	No	Two babies had admission to NICU	One baby had
25Year	2	0		no work	Spontaneous	Monochorionic	37	16.8	Yes	Diet	hyperthyroidism	No	High school	160	66.8	19.7	4.1	238	131	0.398	5.22	3.69	34	328	48	8	121	No	No	No	No					36	cesarean section	twin pregnancy	No	No	No	No	2550	2750	YY	No	No	One baby had admission to NICU	No
28Year	2	0		no work	Spontaneous	Monochorionic	35	9.8	Yes	Diet	No	No	polytechnic school	158	57	18.9	3.94	203	121	0.366	6.61	1.8	35.1	280	54	15	149	No	No	No	No					35	cesarean section	twin pregnancy	No	No	Yes	No	1900	2380	YY	No	No	One baby had admission to NICU	No
38Year	4	0		no work	ART	Dichorionic	33	3	Yes	Diet	No	No	Middle school	150	63	26.6	3.71	255	116	0.351	8.5	3.2	33.8	210	57	11	192	Yes	Yes	Yes	Yes	33	145	95	340	35	cesarean section	preeclampsia，twin pregnancy	No	No	No	No	2300	2360	XX	No	No	No	No
32Year	1	0		having work	Spontaneous	Dichorionic	32	12	Yes	Diet	No	No	Undergraduate course	170	87	25.9	3.69	288	114	0.345	5.95	1.96	31.9	303	57	16	146	Yes	No	No	No					33	cesarean section	twin pregnancy	No	No	No	No	1500	1920	XX	No	No	Two babies had admission to NICU	No
34Year	1	0		having work	Spontaneous	Dichorionic	36	11	Yes	Diet	No	Yes	Undergraduate course	153	59	20.5	3.81	242	126	0.368	6.14	2.64	34.7	243	55	10	134	Yes	No	No	No					36	cesarean section	twin pregnancy	No	No	No	No	2240	2100	XY	No	No	Two babies had admission to NICU	One baby had
29Year	3	0		no work	ART	Dichorionic	36	16	Yes	Diet	No	No	Junior college	160	80	25	4.61	219	136	0.414	4.27	19.8	35.7	308	60	13	179	No	No	Yes	No					36	cesarean section	Pregnancy induced hypertension，twin pregnancy	No	No	No	No	2500	2750	YY	No	No	No	No
30Year	1	0		having work	Spontaneous	Dichorionic	37	12	Yes	Diet	No	No	Undergraduate course	155	63.6	21.4	4.1	246	126	0.38	6.06	3.24	33.5	229	52	19	239	Yes	No	No	No					37	cesarean section	twin pregnancy	No	No	Yes	No	2600	2400	XY	No	No	No	No
31Year	1	0		having work	ART	Dichorionic	37	15.1	Yes	Diet	No	No	Undergraduate course	152	65.5	21.8	3.4	180	114	0.352	7.64	2.62	36.4	259	49	9	120	No	No	No	No					37	cesarean section	twin pregnancy	No	No	No	No	2790	2430	XY	No	No	No	No
29Year	2	0		having work	Spontaneous	Monochorionic	36	19.5	Yes	Diet	No	No	Undergraduate course	165	76.5	20.9	3.79	223	115	0.351	5.99	7.38	33.5	184	48	13	163	Yes	No	No	No					37	cesarean section	twin pregnancy	No	No	No	No	2650	2450	YY	No	No	No	No
25Year	1	0		having work	Spontaneous	Dichorionic	35	25	Yes	Diet	No	No	Junior college	165	73	17.6												Yes	No	No	No					36	cesarean section	twin pregnancy	No	No	No	No	2210	2550	XY	No	No	Two babies had admission to NICU	No
32Year	3	0		no work	ART	Dichorionic	35	14.5	Yes	Diet	No	No	Middle school	160	68.5	19.1	4.12	185	129	0.402	6.97	1.89	32.6	233	51	7	144	No	Yes	No	No					35	cesarean section	twin pregnancy	No	No	No	No	2270	2270	XX	No	No	Two babies had admission to NICU	No
38Year	1	0		no work	ART	Dichorionic	34	13.2	Yes	Diet	No	No	High school	158	71.4	23.5	3.64	214	123	0.377	6.29	2.28	35.3	220	48	15	176	Yes	No	No	No					34	cesarean section	twin pregnancy	No	No	No	No	1330	2650	XY	One baby had	Yes	One baby had admission to NICU	No
33Year	4	0		no work	ART	Dichorionic	34	11.3	Yes	Diet	No	No	High school	162	79	25.8	4.56	217	142	0.437	7.67	8.96	39	229	55	25	169	Yes	No	Yes	Yes	32	167	106	4648	34	cesarean section	severe preeclampsia	No	No	Yes	No	2390	2830	YY	No	No	One baby had admission to NICU	No
29Year	1	0		having work	ART	Dichorionic	36	14.5	Yes	Diet	No	No	Undergraduate course	152	55	17.5	2.82	195	100	0.3	7.5	2.51	30.8	250	59	15	141	No	No	No	No					36	cesarean section	twin pregnancy	No	No	Yes	No	2210	2360	XX	No	No	Two babies had admission to NICU	Two babies had
25Year	3	0		having work	ART	Dichorionic	27	5	Yes	Diet	No	No	Undergraduate course	159	60	21.7	3.2	147	110	0.322	6.75	1.77	32.3	289	49	19	145	Yes	No	No	No					29	cesarean section	twin pregnancy	No	No	Yes	No	1260	1250	YY	No	No	Two babies had admission to NICU	No
33Year	1	0		having work	Spontaneous	Dichorionic	37	10	Yes	Diet	No	No	Junior college	168	57.2	16.9	3.49	307	111	0.332	7.38	2.33	38.2	223	47	13	126	No	No	Yes	Yes	37	137	94	1865	37	cesarean section	twin pregnancy	No	No	No	No	2580	2400	YY	No	No	One baby had admission to NICU	One baby had
20Year	1	0		no work	Spontaneous	Monochorionic	37	21.9	Yes	Diet	No	No	Middle school	160	88.9	26.1	3.96	345	112	0.345	4.82	3.01	38.3	235	50	11	151	No	No	No	No					37	cesarean section	twin pregnancy	No	No	No	No	2130	2400	YY	No	No	One baby had admission to NICU	No
34Year	1	0		having work	ART	Dichorionic	34	14	Yes	Diet	No	No	Undergraduate course	158	56	16.8												No	Yes	No	No					35	cesarean section	cardiac insufficiency	No	Yes	No	No	1750	1820	XY	Two babies had	No	Two babies had admission to NICU	One baby had
30Year	3	0		having work	ART	Dichorionic	35	25	Yes	Diet	No	No	High school	158	74	19.6	3.75	149	122	0.373	7.49	4.33	31.7	277	53	7	106	No	No	No	No					35	cesarean section	twin pregnancy	No	No	No	No	2600	2550	YY	No	No	No	No
36Year	5	1	20	no work	ART	Dichorionic	32	19	Yes	Diet	No	No	Illiteracy	158	82	26	3.59	234	112	0.336	8.11	4.82	31.3	246	47	50	156	Yes	No	Yes	Yes	31	158	105	363	32	cesarean section	severe preeclampsia	No	No	No	No	2050	1990	XY	No	No	Two babies had admission to NICU	No
26Year	3	0		having work	Spontaneous	Monochorionic	30	19	Yes	Diet	No	No	Middle school	158	74	22	3.34	156	103	0.322	6.2	2.06	35.3	185	43	9	134	Yes	No	No	No					30	cesarean section	twin pregnancy	No	Yes	No	No	1740	1840	XX	No	No	Two babies had admission to NICU	No
32Year	1	0		having work	ART	Dichorionic	34	17.5	Yes	Diet	No	No	Undergraduate course	165	79	22.5	4.23	196	132	0.393	6.51	3.24	33.3	153	61	13	161	Yes	No	Yes	Yes	32	142	92	1164	34	cesarean section	preeclampsia，twin pregnancy	No	No	Yes	No	2070	2350	XX	One baby had	No	Two babies had admission to NICU	No
35Year	1	0		having work	ART	Dichorionic	36	14.9	Yes	Diet	No	No	Undergraduate course	169	90.4	26.4	4.16	164	135	0.402	5.19	2.9	35.3	247	56	8	118	Yes	No	No	No					36	cesarean section	twin pregnancy	No	No	No	No	2620	2700	XY	No	No	One baby had admission to NICU	No
25Year	1	0		having work	ART	Dichorionic	32	14	Yes	Diet	No	No	Junior college	157	77	25.8	3.8	264	119	0.35	5.53	3.36	34.2	309	55	16	147	Yes	No	No	No					35	cesarean section	Severe ICP	No	No	No	No	2360	2180	XY	No	No	Two babies had admission to NICU	No
29Year	2	0		no work	Spontaneous	Dichorionic	36	7.5	Yes	Diet	No	No	Undergraduate course	160	65	22.4	3.15	219	97	0.295	5.31	1.97	34.9	227	47	7	128	No	No	No	No					37	cesarean section	twin pregnancy	No	No	No	No	2720	2420	XY	No	No	One baby had admission to NICU	No
32Year	1	0		having work	Spontaneous	Dichorionic	36	14.4	Yes	Diet	No	No	Undergraduate course	162	67	20	3.54	213	110	0.34	8.75	2.28	35.8	262	54	16	160	No	No	No	No					36	cesarean section	twin pregnancy	No	No	No	No	2380	2560	XX	No	No	No	No
27Year	2	0		no work	Spontaneous	Monochorionic	36	22.4	Yes	Diet	No	No	Junior college	157	68.4	18.6	3.56	160	119	0.369	7.96	2.07	33.5	277	53	13	152	No	No	Yes	Yes	35	153	98	4744	35	cesarean section	twin pregnancy	No	No	Yes	No	1600	2500	XX	No	No	One baby had admission to NICU	No
32Year	2	0		having work	ART	Dichorionic	35	14.8	Yes	Diet	No	No	Junior college	161	74.8	23.1	3.87	216	121	0.38	5.24	3.77	31.2	343	48	11	118	Yes	No	Yes	Yes	35	145	90	365	35	cesarean section	severe preeclampsia	No	No	Yes	No	2120	2310	XY	No	No	Two babies had admission to NICU	No
29Year	1	0		having work	ART	Dichorionic	37	15	Yes	Diet	No	Yes	Undergraduate course	176	80	20.9	4.37	215	135	0.404	8.13	3.34	35.9	225	58	16	155	No	No	No	No					37	cesarean section	twin pregnancy	Yes	No	No	No	3430	2470	XX	No	No	One baby had admission to NICU	No
31Year	1	0		having work	Spontaneous	Monochorionic	34	20.5	Yes	Diet	No	No	Junior college	165	74.5	19.8	3.45	208	109	0.322	6.44	1.93	35.1	250	54	12	154	Yes	No	No	No					34	cesarean section	twin pregnancy	No	No	No	No	2350	2590	YY	No	No	One baby had admission to NICU	No
31Year	1	0		having work	ART	Dichorionic	37	8	Yes	Diet	No	No	Undergraduate course	156	73.7	27.2	3.53	270	106	0.33	5.9	5.83	37.1	220	49	9	138	No	No	No	No					37	cesarean section	twin pregnancy	No	No	No	No	3000	2500	XY	No	No	One baby had admission to NICU	No
39Year	3	1	8	no work	Spontaneous	Monochorionic	34	9.5	Yes	Diet	No	Yes	polytechnic school	164	70.5	22.6	3.49	161	115	0.336	5.48	5	38.1	257	52	24	134	Yes	No	No	No					34	cesarean section	Severe ICP	No	No	No	No	2140	2210	XX	No	No	Two babies had admission to NICU	No
26Year	2	0		having work	ART	Dichorionic	35	13	Yes	Diet	No	No	Junior college	164	90	28.6	4.13	260	126	0.39	7.11	4	33.4	361	46	13	132	Yes	No	No	No					36	cesarean section	twin pregnancy	No	No	No	No	2540	2750	YY	No	No	No	No
26Year	4	0		no work	Spontaneous	Dichorionic	35	15	Yes	Diet	No	No	Undergraduate course	172	74	19.9	3.66	246	114	0.345	5.49	5.19	34.8	261	58	9	139	Yes	No	No	No					36	cesarean section	twin pregnancy	No	No	No	No	2640	2700	XX	No	No	Two babies had admission to NICU	Two babies had
37Year	1	0		having work	ART	Dichorionic	32	9.4	Yes	Diet	No	Yes	Junior college	155	70.2	24.9	3.73	185	122	0.366	7.79	4.79	36.1	303	54	22	154	Yes	No	Yes	Yes	34	165	101	774	34	cesarean section	Complete placenta previa, preeclampsia	No	No	No	No	2220	2180	XY	No	No	Two babies had admission to NICU	No
33Year	2	0		having work	Spontaneous	Monochorionic	35	10	Yes	Diet	No	No	Junior college	158	51	16.4	3.44	148	107	0.323	8.18	1.88	33.9	165	48	56	231	Yes	No	No	No					35	cesarean section	twin pregnancy	No	No	No	No	1820	1950	XX	No	No	Two babies had admission to NICU	No
28Year	1	0		having work	ART	Dichorionic	30	12	Yes	Diet	No	No	Undergraduate course	158	68	22.4	4.01	180	123	0.368	6.2	3.14	32.2	353	53	8	129	Yes	No	No	No					31	cesarean section	twin pregnancy	No	No	Yes	No	1740	1710	XY	No	No	Two babies had admission to NICU	One baby had
32Year	3	1	8	having work	Spontaneous	Dichorionic	35	13.5	Yes	Diet	No	No	postgraduate	167	72.5	21.1	3.51	323	116	0.351	7.01	2.08	35.2	285	51	14	135	No	No	No	No					35	cesarean section	twin pregnancy	No	No	No	No	2350	2370	YY	No	No	No	No
40Year	3	0		having work	ART	Dichorionic	36	11.7	Yes	Diet	No	No	Undergraduate course	158	56.7	18	3.6	303	118	0.348	9.15	1.84	33.1	184	45	21	153	Yes	Yes	No	No					36	cesarean section	twin pregnancy	No	No	No	No	1900	2250	YY	No	No	Two babies had admission to NICU	One baby had
38Year	6	1	11	having work	Spontaneous	Dichorionic	37	12.9	Yes	Diet	No	No	High school	160	71.9	21.6	3.53	171	119	0.357	7.29	3.73	35.9	407	53	28	148	No	No	No	No					37	cesarean section	twin pregnancy，Scarred uterus	No	No	No	No	2580	2750	XY	No	No	No	No
34Year	2	1	10	no work	ART	Dichorionic	35	16.7	Yes	Diet	No	No	Middle school	161	75.2	22.5	3.26	250	101	0.31	5.14	5.15	33.7	247	44	6	135	Yes	No	No	No					37	cesarean section	twin pregnancy	No	No	No	No	2350	2730	XY	No	No	No	No
26Year	1	0		having work	Spontaneous	Dichorionic	33	13	Yes	Diet	No	No	Junior college	152	51	22												Yes	Yes	No	No					33	cesarean section	Severe ICP	No	No	No	No	1730	1830	XY	No	No	Two babies had admission to NICU	No
38Year	1	0		having work	ART	Dichorionic	36	16	Yes	Diet	No	Yes	Undergraduate course	162	96	30.4	4.25	331	130	0.387	7.27	3.64	35.7	220	49	10	198	Yes	Yes	Yes	Yes	36	144	98	927	37	cesarean section	twin pregnancy	No	No	No	No	3360	3100	XX	No	No	One baby had admission to NICU	No
28Year	2	1	3	having work	Spontaneous	Dichorionic	35	11	Yes	Diet	No	No	Undergraduate course	153	61	21.3												Yes	No	No	No					35	cesarean section	twin pregnancy	No	No	No	No	2080	1690	XX	No	No	Two babies had admission to NICU	No
36Year	4	2	5	having work	Spontaneous	Dichorionic	35	23	Yes	Diet	No	No	Middle school	160	85.4	24.4	3.46	192	104	0.318	5.78	3.35	35.6	255	55	9	137	No	No	No	No					36	cesarean section	twin pregnancy，Scarred uterus	No	No	No	No	2960	3220	YY	No	No	No	No
33Year	2	0		having work	ART	Dichorionic	37	14.2	Yes	Diet	No	No	Undergraduate course	163	67.8	20.1	3.02	289	94	0.285	5.83	2.18	32.7	337	49	11	127	No	No	No	No					37	cesarean section	twin pregnancy	No	No	No	No	2520	2250	XX	No	No	One baby had admission to NICU	No
32Year	2	1	8	no work	Spontaneous	Dichorionic	37	26	Yes	Diet	No	No	Junior college	161	100	28.5	3.79	231	120	0.364	4.85	1.9	33.5	255	56	29	161	No	No	No	No					37	cesarean section	twin pregnancy	No	No	No	No	2080	2800	XY	No	No	One baby had admission to NICU	No
25Year	1	0		having work	Spontaneous	Dichorionic	36	16.7	Yes	Diet	No	No	Undergraduate course	160	67.7	19.9	4.09	194	124	0.382	7.14	2.58	36.2	203	54	17	123	No	No	No	No					36	cesarean section	twin pregnancy	No	No	No	No	2300	2370	YY	No	No	Two babies had admission to NICU	One baby had
35Year	4	1	8	having work	Spontaneous	Dichorionic	30	15	Yes	Diet	No	No	Undergraduate course	160	77	24.2	3.75	255	123	0.36	7.28	4.8	33.5	323	56	15	144	Yes	No	Yes	Yes	29	144	98	3413	30	cesarean section	severe preeclampsia	No	No	No	No	1290	830	YY	No	No	Two babies had admission to NICU	No
31Year	2	0		having work	Spontaneous	Monochorionic	35	20	Yes	Diet	No	No	Junior college	161	75	21.2	3.45	188	118	0.352	6.12	2.45	32	242	60	12	149	No	No	No	No					35	vaginal delivery		No	No	No	No	2240	2310	YY	No	No	Two babies had admission to NICU	No
28Year	1	0		no work	Spontaneous	Dichorionic	35	15	Yes	Diet	No	Yes	Junior college	160	67.8	20.7	4.01	244	128	0.381	5.54	4.21	36.5	286	62	13	155	No	No	No	No					36	cesarean section	twin pregnancy	No	No	No	No	2400	2900	YY	No	No	One baby had admission to NICU	No
30Year	1	0		having work	Spontaneous	Dichorionic	35	22	Yes	Diet	No	No	Undergraduate course	160	80.7	22.4	3.63	311	116	0.351	6.2	1.71	32.8	290	47	11	136	No	No	No	No					36	cesarean section	twin pregnancy	No	No	No	No	2590	2680	XY	No	No	Two babies had admission to NICU	One baby had
33Year	2	0		having work	ART	Dichorionic	28	7.6	Yes	Diet	psoriasis	Yes	Undergraduate course	153	48.6	17.5	3.35	154	110	0.319	3.82	1.94	29.6	520	55	19	176	Yes	Yes	Yes	Yes	22	200	113	1157	28	cesarean section	severe preeclampsia	No	No	No	No	950	590	XX	Two babies had	Yes	Two babies had admission to NICU	No
43Year	2	1	22	no work	ART	Dichorionic	35	22.5	Yes	Diet	No	No	Middle school	155	85	26	3.57	211	114	0.344	5.88	4	33	261	51	12	183	Yes	Yes	Yes	Yes	35	175	89	324	35	cesarean section	preeclampsia，twin pregnancy	No	No	Yes	No	2560	2050	XY	No	No	Two babies had admission to NICU	One baby had
28Year	4	1	3	having work	Spontaneous	Monochorionic	35	11	Yes	Diet	No	No	High school	159	78	36.5	3.94	244	120	0.361	5.15	3.12	33.1	231	44	7	131	Yes	No	No	No					36	cesarean section	twin pregnancy，Scarred uterus	No	No	No	No	2210	2580	XX	No	No	Two babies had admission to NICU	No
36Year	3	1	10	having work	Spontaneous	Dichorionic	37	20	Yes	Diet	No	No	Junior college	162	73	20.1	3.52	153	122	0.367	7.03	2.4	33.9	268	47	15	268	No	No	No	No					37	cesarean section	twin pregnancy	No	No	No	No	2900	2550	XX	No	No	No	No
36Year	1	0		having work	ART	Dichorionic	34	10.7	Yes	Diet	No	No	Undergraduate course	166	80.7	25.4	3.78	194	127	0.377	8.35	3.18	34	247	47	14	147	Yes	No	No	No					35	cesarean section	Severe ICP	No	No	No	No	2220	2010	XX	No	No	Two babies had admission to NICU	No
34Year	1	0		having work	ART	Dichorionic	37	16	Yes	Diet	No	No	High school	160	70	21												No	No	No	No					37	cesarean section	twin pregnancy	Yes	No	No	No	2620	2310	XY	No	No	No	No
33Year	1	0		having work	ART	Dichorionic	30	4.7	Yes	Diet	No	Yes	Undergraduate course	170	69.7	22.4	3.79	195	117	0.345	8.12	2.41	34.7	225	51	18	151	Yes	No	No	No					31	cesarean section	Prenatal bleeding	No	No	Yes	No	1600	1620	XY	No	No	Two babies had admission to NICU	No
37Year	2	1	5	having work	ART	Dichorionic	35	17	Yes	Diet	No	No	High school	166	82	23.5	3.4	175	108	0.321	5.41	2.28	35	210	46	9	134	Yes	No	No	No					36	cesarean section	twin pregnancy，Scarred uterus	No	No	No	No	2900	2850	XY	No	No	Two babies had admission to NICU	No
32Year	2	1	4	having work	Spontaneous	Dichorionic	36	16.2	Yes	Diet	No	No	High school	160	66.2	19.5	3.54	147	106	0.33	4.52	2.1	33.8	194	54	9	145	No	No	No	No					36	cesarean section	twin pregnancy，Scarred uterus	No	No	No	No	2540	2570	YY	No	No	No	No
32Year	1	0		having work	ART	Dichorionic	35	11	Yes	Diet	No	No	Undergraduate course	168	87	26.9	4.59	217	137	0.411	5.15	2.67	35.8	263	42	15	159	Yes	No	No	No					35	vaginal delivery		Yes	No	No	No	2450	2050	XY	No	No	Two babies had admission to NICU	No
37Year	1	0		having work	ART	Dichorionic	36	20	Yes	Diet	No	No	postgraduate	173	95.6	26.7	3.44	247	112	0.343	6.98	3.24	35.2	298	54	14	144	Yes	No	No	No					36	cesarean section	twin pregnancy	No	No	No	No	2480	2880	XX	No	No	No	No
33Year	3	1	8	having work	Spontaneous	Monochorionic	34	15.5	Yes	Diet	No	No	High school	165	72.5	20.9	3.68	191	126	0.369	4.36	1.7	34.6	154	45	28	168	Yes	No	No	No					34	cesarean section	twin pregnancy	No	No	No	No	1970	1870	XX	No	No	Two babies had admission to NICU	No
28Year	2	0		having work	ART	Dichorionic	30	7.2	Yes	Diet	No	No	Junior college	162	59.2	19.8	3.42	245	112	0.33	8.95	3.32	32.2	260	54	9	183	Yes	No	No	No					30	cesarean section	twin pregnancy	No	Yes	No	No	1640	1550	YY	One baby had	No	Two babies had admission to NICU	No
31Year	2	0		no work	ART	Dichorionic	35	5.2	Yes	Diet	No	No	polytechnic school	159	68.3	24.9	4.17	230	115	0.349	8.14	4.18	32	357	56	15	132	Yes	No	No	No					36	cesarean section	twin pregnancy	No	No	No	No	2600	2580	YY	No	No	No	No
32Year	1	0		having work	ART	Dichorionic	32	5	Yes	Diet	No	Yes	Undergraduate course	153	56	21.7	3.31	295	100	0.307	4.75	2.51	26.6	239	56	152	183	Yes	No	No	No					32	cesarean section	twin pregnancy	No	No	No	No	1830	1600	XX	No	No	Two babies had admission to NICU	No
32Year	1	0		having work	ART	Dichorionic	37	15	Yes	Diet	No	No	Undergraduate course	155	65	20.8	3.76	182	120	0.359	6.89	3.61	33.8	275	51	12	186	No	Yes	No	No					37	cesarean section	twin pregnancy	No	No	No	No	2630	2510	XX	No	No	Two babies had admission to NICU	No
34Year	1	0		having work	Spontaneous	Monochorionic	35	17.8	Yes	Diet	hyperthyroidism	No	Undergraduate course	158	52	20.8	2.95	230	99	0.284	6.62	3.29	34.2	242	49	13	165	No	No	Yes	Yes	35	139	92	Pro+	35	cesarean section	twin pregnancy	No	No	No	No	2250	2620	XX	No	No	Two babies had admission to NICU	No
30Year	2	0		having work	ART	Dichorionic	34	12	Yes	Diet	No	No	Junior college	155	63	21.2	3.48	159	108	0.324	6.7	6.28	34.9	257	48	9	140	Yes	No	No	No					34	cesarean section	twin pregnancy	No	No	Yes	No	2570	2420	XX	No	No	Two babies had admission to NICU	No
33Year	1	0		having work	ART	Dichorionic	36	10	Yes	Diet	No	Yes	Undergraduate course	154	56.1	18.4	3.22	237	105	0.318	8.83	3.66	32.9	236	53	12	177	Yes	No	No	No					36	cesarean section	twin pregnancy	No	No	No	No	2350	2550	XY	No	No	No	No
34Year	1	0		having work	ART	Dichorionic	33	30	Yes	Diet	No	No	Middle school	165	80	18.4	3.27	177	107	0.321	7.54	2.66	31	247	49	13	136	Yes	No	Yes	Yes	33	158	93	613	33	cesarean section	severe preeclampsia	Yes	Yes	Yes	No	2160	1930	XX	No	No	Two babies had admission to NICU	No
32Year	4	0		having work	Spontaneous	Dichorionic	37	12.5	Yes	Diet	No	No	High school	153	68.6	23.9	3.25	252	107	0.32	6.36	3.29	32.7	130	53	12	143	No	No	No	No					37	cesarean section	twin pregnancy	No	No	No	No	2440	2470	XX	No	No	No	No
29Year	1	0		having work	ART	Dichorionic	36	15.2	Yes	Diet	No	No	Undergraduate course	156	68	21.6	3.5	253	117	0.341	6.17	2.51	35.9	251	48	8	194	Yes	No	No	No					36	cesarean section	twin pregnancy	No	No	Yes	No	2510	2150	XX	No	No	Two babies had admission to NICU	One baby had
30Year	1	0		having work	ART	Monochorionic	35	15.5	Yes	Diet	No	No	Undergraduate course	161	67.5	20	3.5	303	119	0.353	7.74	2.51	32	303	57	9	156	Yes	Yes	No	No					36	cesarean section	twin pregnancy	No	No	No	No	1570	2620	XX	No	No	No	No
33Year	8	0		no work	Spontaneous	Monochorionic	36	15	Yes	Diet	No	No	Middle school	157	80	26.3	4.08	246	136	0.399	6.35	3.18	36.8	289	48	12	202	Yes	No	No	No					36	cesarean section	twin pregnancy	No	No	No	No	2270	2150	XX	No	No	Two babies had admission to NICU	No
35Year	1	0		having work	ART	Dichorionic	37	19	Yes	Diet	No	No	Undergraduate course	163	76	21.7	3.98	162	120	0.361	7.6	1.49	35	267	57	15	164	No	No	No	No					37	cesarean section	twin pregnancy	No	No	No	No	2530	2500	XX	No	No	No	No
29Year	3	0		having work	Spontaneous	Monochorionic	31	15	Yes	Diet	No	No	Undergraduate course	172	81	22.3	3.22	189	102	0.299	6.34	2.09	34	180	50	8	139	Yes	No	No	No					36	cesarean section	twin pregnancy	No	No	No	No	2950	2410	YY	No	No	Two babies had admission to NICU	No
40Year	3	0		having work	ART	Dichorionic	35	12.2	Yes	Diet	No	No	Junior college	165	73.2	22.4	3.26	279	105	0.308	6.33	4.35	34.6	307	64	12	136	Yes	No	Yes	Yes	35	150	86	915	35	cesarean section	twin pregnancy	No	No	No	No	2280	2510	YY	No	No	Two babies had admission to NICU	No
34Year	4	2	8	having work	Spontaneous	Dichorionic	36	9	Yes	Drug	No	Yes	primary school	161	90	31.2	3.83	300	104	0.322	5.52	1.76	32.5	205	48	15	176	Yes	No	Yes	No					36	cesarean section	Fetal distress	No	No	No	No	2730	2520	YY	No	No	One baby had admission to NICU	No
31Year	1	0		having work	ART	Dichorionic	33	15.5	Yes	Diet	No	No	Undergraduate course	170	77	21.4	3.31	226	112	0.331	7.74	3.01	36.4	249	52	12	149	Yes	No	No	No					32	cesarean section	twin pregnancy	No	No	No	No	1870	1760	YY	No	No	Two babies had admission to NICU	No
31Year	3	0		having work	ART	Dichorionic	34	11.5	Yes	Diet	No	Yes	postgraduate	153	65.5	23	3.87	319	125	0.373	7.15	2.38	36.4	289	54	28	160	Yes	No	Yes	Yes	34	163	93	700	35	cesarean section	preeclampsia	No	No	No	No	2290	1970	YY	No	No	Two babies had admission to NICU	One baby had
34Year	3	0		no work	ART	Dichorionic	37	19.5	Yes	Diet	No	No	Junior college	155	67	19.9	3.55	177	115	0.35	5.24	3.63	35	215	48	9	168	No	No	No	No					37	cesarean section	twin pregnancy	No	No	No	No	2310	2350	YY	No	No	One baby had admission to NICU	One baby had
22Year	1	0		no work	ART	Dichorionic	36	19	Yes	Diet	No	No	Middle school	163	97	32.2												Yes	No	Yes	Yes	36	153	82	307	37	cesarean section	preeclampsia，twin pregnancy	No	No	No	No	3050	2730	XY	No	No	No	No
35Year	1	0		having work	ART	Dichorionic	37	16.7	Yes	Diet	No	No	Undergraduate course	158	71.2	22.9	3.16	246	106	0.31	8.01	3.41	35.5	177	33	11	154	No	No	No	No					37	cesarean section	twin pregnancy	Yes	No	No	No	2640	2620	YY	No	No	No	No
33Year	1	0		having work	Spontaneous	Dichorionic	35	17	Yes	Diet	No	No	Undergraduate course	158	72	22	3.5	274	115	0.331	5.73	2.67	33.7	166	41	14	170	Yes	No	No	No					35	cesarean section	twin pregnancy	No	No	Yes	No	2290	2470	YY	No	No	One baby had admission to NICU	No
27Year	1	0		having work	Spontaneous	Monochorionic	35	11.5	Yes	Diet	No	No	Undergraduate course	162	72.5	22.4	3.5	224	113	0.324	6.68	1.81	40.3	263	43	16	143	Yes	No	No	No					36	cesarean section	twin pregnancy	No	No	No	No	2200	2100	XX	No	No	Two babies had admission to NICU	No
45Year	7	4	3	having work	Spontaneous	Dichorionic	36	11.6	Yes	Diet	No	Yes	Undergraduate course	157	64	20.4	3.25	237	110	0.322	6.06	2.25	33.9	309	47	7	114	No	No	No	No					37	cesarean section	twin pregnancy	No	No	No	No	2650	2430	YY	No	No	No	No
26Year	1	0		having work	Spontaneous	Dichorionic	37	12	Yes	Diet	No	Yes	Undergraduate course	158	70	23.2	4.35	165	127	0.366	7.48	4.83	35	302	58	12		No	No	No	No					37	cesarean section	twin pregnancy	No	No	No	No	2440	2310	XX	No	No	No	No
32Year	2	1	10	no work	ART	Dichorionic	35	24.5	Yes	Diet	No	Yes	High school	162	92	25.7	3.46	189	116	0.341	8.5	2.75	30.7	302	41	14	159	Yes	Yes	No	No					35	cesarean section	twin pregnancy，Scarred uterus	No	No	No	No	3310	2530	XY	One baby had	No	Two babies had admission to NICU	No
32Year	1	0		having work	ART	Dichorionic	37	15.2	Yes	Diet	No	Yes	Undergraduate course	160	80.2	25.3	4	161	127	0.375	7.3	4.61	37.4	273	40	8	179	No	No	No	No					37	cesarean section	twin pregnancy	No	No	No	No	2850	2740	XY	No	No	No	No
30Year	1	0		having work	ART	Dichorionic	33	12.5	Yes	Diet	No	No	Master	164	79.3	25.2	3.75	238	115	0.342	6.27	2.95	37.4	264	34	10	153	Yes	No	No	No					36	cesarean section	twin pregnancy	Yes	No	No	No	2720	2480	YY	No	No	No	No
27Year	2	0		having work	Spontaneous	Dichorionic	28	10.5	Yes	Diet	No	No	Junior college	163	65.5	20.7	4.04	191	130	0.383	6.75	3.87	39.1	282	40	10	143	Yes	No	No	No					28	vaginal delivery		No	No	No	No	990	870	XX	No	No	Two babies had admission to NICU	No
36Year	1	0		having work	ART	Dichorionic	36	2	Yes	Drug	No	No	Undergraduate course	155	60	24.9	4.15	230	133	0.39	7.8	5.85	37	369	45	7		No	Yes	No	No					37	cesarean section	twin pregnancy	No	No	No	No	2320	2020	XX	No	No	One baby had admission to NICU	No
36Year	3	0		having work	ART	Dichorionic	37	13.4	Yes	Diet	No	No	Master	165	75.9	22.9	3.54	154	120	0.35	5.27	2.16	35.4	203	33	26	130	No	No	No	No					37	cesarean section	twin pregnancy	Yes	No	No	No	2730	2920	XY	No	No	Two babies had admission to NICU	No
29Year	1	0		no work	ART	Dichorionic	36	9.3	Yes	Diet	No	Yes	Junior college	154	56.8	20	4.04	212	133	0.386	6.82	2.34	37.3	341	42	13	179	No	No	No	No					37	cesarean section	twin pregnancy	No	No	No	No	2710	2410	XY	No	No	One baby had admission to NICU	No
41Year	2	0		having work	ART	Dichorionic	29	10	Yes	Diet	No	No	Junior college	156	81	29.1	4.27	248	120	0.359	6.85	2.95	33.4	198	41	5	156	Yes	No	No	No					29	vaginal delivery		No	No	No	No	1580	1220	YY	No	No	Two babies had admission to NICU	No
31Year	1	0		having work	ART	Dichorionic	34	15	Yes	Diet	No	No	postgraduate	163	74	22.2	3.85	242	126	0.377	6.98	3.22	34	310	54	20	140	Yes	No	No	No					34	cesarean section	twin pregnancy	No	No	No	No	2320	2360	YY	No	No	Two babies had admission to NICU	No
28Year	2	0		having work	Spontaneous	Monochorionic	36	20	Yes	Diet	No	No	Undergraduate course	160	70	19.5	4.08	227	139	0.399	7.15	2.43	33.3	295	49	8	145	Yes	No	No	No					36	cesarean section	twin pregnancy	Yes	Yes	Yes	No	2820	2570	YY	No	No	Two babies had admission to NICU	One baby had
27Year	1	0		having work	Spontaneous	Monochorionic	35	14	Yes	Diet	No	No	Undergraduate course	161	65.1	18.1	2.89	266	92	0.26	7.46	2.89	33.5	295	29	9	119	Yes	No	No	No					35	cesarean section	twin pregnancy	No	No	No	No	2150	2660	XX	No	No	Two babies had admission to NICU	No
39Year	2	1	15	having work	ART	Monochorionic	35	10.6	Yes	Diet	No	No	Undergraduate course	165	71.4	22.2	3.89	230	124	0.373	7.3	6.16	31.5	332	52	14	175	Yes	No	No	No					36	cesarean section	twin pregnancy	Yes	No	No	No	2380	2770	YY	No	No	No	No
34Year	1	0		having work	ART	Dichorionic	32	10	Yes	Diet	No	No	High school	165	79	25.3	3.48	189	113	0.336	6.5	3.62	33.9	364	60	14	171	Yes	Yes	No	No					32	cesarean section	twin pregnancy	No	No	No	No	1920	2030	YY	No	No	Two babies had admission to NICU	No
31Year	1	0		having work	ART	Dichorionic	35	10.5	Yes	Diet	No	No	Junior college	168	76.5	23.3	3.38	210	104	0.311	5.34	3.81	34.3	268	48	7	163	No	No	No	No					35	cesarean section	twin pregnancy	No	No	No	No	2600	2410	XX	No	No	Two babies had admission to NICU	No
28Year	1	0		no work	Spontaneous	Monochorionic	34	14.2	Yes	Diet	No	No	Undergraduate course	156	60.2	18.9	3.04	249	94	0.281	5.64	1.53	34.9	213	33	12	155	Yes	No	No	No					35	cesarean section	twin pregnancy	No	No	No	No	1650	1720	XX	No	No	Two babies had admission to NICU	No
28Year	1	0		having work	Spontaneous	Dichorionic	36	10	Yes	Diet	No	No	Junior college	158	72	24.8	4.29	248	135	0.386	7.6	3.43	35.2	275	42	8	167	Yes	No	No	No					36	cesarean section	twin pregnancy	No	No	No	No	2800	2240	XY	No	No	One baby had admission to NICU	One baby had
37Year	1	0		having work	ART	Dichorionic	34	16	Yes	Diet	No	Yes	Junior college	165	88.5	26.6	3.92	225	120	0.357	5.98	2.99	35.6	326	41	1	120	Yes	No	Yes	Yes	35	154	93	320	35	cesarean section	severe preeclampsia	No	No	No	No	2430	2280	XY	No	No	One baby had admission to NICU	No
28Year	1	0		having work	ART	Dichorionic	34	6.5	Yes	Diet	No	No	Undergraduate course	158	64	23	3.93	190	119	0.339			33.9		40	23		Yes	No	No	No					36	cesarean section	twin pregnancy	No	No	No	No	2460	2080	YY	No	No	Two babies had admission to NICU	One baby had
28Year	2	0		having work	ART	Dichorionic	37	14.3	Yes	Diet	No	No	High school	158	75.3	24.4	3.26	272	106	0.313	6.14	2.51	33.4	185	38	15	154	No	No	No	No					37	cesarean section	twin pregnancy	No	No	No	No	2690	2910	YY	No	No	No	No
26Year	1	0		no work	Spontaneous	Dichorionic	36	13.2	Yes	Diet	No	No	Junior college	155	57.2	18.3	3.11	271	104	0.31	6.21	2.66	34.4	306	38	11	154	Yes	No	No	No					36	cesarean section	twin pregnancy	No	No	No	No	2450	2980	XY	One baby had	No	Two babies had admission to NICU	One baby had
31Year	1	0		having work	ART	Dichorionic	37	19.8	Yes	Diet	No	No	Undergraduate course	166	72.4	19	3.58	149	114	0.34	7.45	2.78	31.8	166	36	12	176	No	No	No	No					38	cesarean section	twin pregnancy	No	No	No	No	3050	3180	YY	No	No	No	No
33Year	1	0		no work	ART	Dichorionic	36	18	Yes	Diet	No	No	Middle school	158	78	24	3.27	219	96	0.293	7.46	2.75	31	241	32	15	203	Yes	No	Yes	Yes	36	162	102	1485	36	cesarean section	twin pregnancy	No	No	No	No	2810	2030	XX	No	No	Two babies had admission to NICU	No
29Year	3	0		having work	ART	Dichorionic	35	17	Yes	Diet	No	No	Undergraduate course	163	82	24.4	3.1	218	100	0.299	5.48	2.79	34.7	361	40	14	160	Yes	Yes	No	No					35	cesarean section	twin pregnancy	No	No	No	No	2400	2300	XY	No	No	One baby had admission to NICU	No
33Year	2	0		having work	ART	Dichorionic	37	18	Yes	Diet	No	No	postgraduate	163	63	18.8	3.8	212	121	0.359	6.2	2.79	33.9	237	39	16	141	No	No	No	No					37	cesarean section	twin pregnancy	No	No	No	No	2330	2150	XX	No	No	One baby had admission to NICU	One baby had
34Year	2	0		having work	Spontaneous	Dichorionic	36	6.5	Yes	Diet	No	No	Junior college	160	66.5	23.4	3.17	192	112	0.321	3.63	3.87	35.6	227	36	24	179	Yes	No	No	No					37	cesarean section	twin pregnancy	No	No	No	No	2350	2050	XY	No	No	Two babies had admission to NICU	No
30Year	1	0		having work	ART	Dichorionic	35	6	Yes	Diet	No	Yes	Junior college	159	78	28.4												Yes	No	No	No					36	cesarean section	twin pregnancy	No	No	No	No	2550	2360	XX	No	No	Two babies had admission to NICU	Two babies had
39Year	4	1	12	no work	ART	Dichorionic	35	17	Yes	Diet	No	Yes	Junior college	161	77	23.1	3.71	226	118	0.353	4.14	4.17	32.2	238	41	13	170	Yes	Yes	No	No					36	cesarean section	twin pregnancy	Yes	No	No	No	2730	2860	XY	No	No	Two babies had admission to NICU	No
29Year	2	0		having work	Spontaneous	Monochorionic	36	16.7	Yes	Diet	No	No	Junior college	160.5	79.3	24.2	3.56	262	101	0.309	6.75	2.94	36.3	253	42	10	161	No	No	No	No					37	cesarean section	twin pregnancy	No	No	No	No	2630	2480	XX	No	No	No	No
31Year	1	0		having work	Spontaneous	Monochorionic	31	8	Yes	Diet	ankylosing spondylitis	No	Undergraduate course	158	62	21.6	3.34	223	106	0.327	6.62	1.85	34.1	234	39	27	144	Yes	No	No	No					32	cesarean section	twin pregnancy	No	No	No	No	1640	1530	XX	No	No	Two babies had admission to NICU	No
37Year	1	0		having work	ART	Dichorionic	31	10	Yes	Diet	No	Yes	Master	159	60	19.7	4.32	260	135	0.414	10.35	2.97	34.9	310	41	9	129	Yes	Yes	Yes	Yes	31	149	98	542	33	cesarean section	preeclampsia，Severe ICP	No	No	No	No	2000	1780	XY	No	No	Two babies had admission to NICU	One baby had
33Year	4	1	7	no work	Spontaneous	Dichorionic	36	22	Yes	Diet	No	No	Junior college	155	76	22.4	3.65	197	115	0.349	6.87	3.1	35.1	193	40	28	150	Yes	No	No	No					36	cesarean section	twin pregnancy	No	No	No	No	2620	2550	XX	No	No	Two babies had admission to NICU	Two babies had
32Year	2	0		no work	Spontaneous	Dichorionic	34	18	Yes	Diet	No	No	Undergraduate course	162	120	38.8	3.97	255	117	0.35	5.87	2.33	36.6			9		Yes	No	Yes	Yes	34	160	101	382	34	cesarean section	severe preeclampsia	No	No	No	No	2030	2640	YY	No	No	Two babies had admission to NICU	No
33Year	1	0		having work	ART	Dichorionic	37	13	Yes	Diet	No	No	Undergraduate course	160	74	23.8	4.1	303	121	0.355	5.7	4.69	32.8	199	40	5	120	No	No	No	No					37	cesarean section	twin pregnancy	No	No	No	No	2300	2440	XY	No	No	One baby had admission to NICU	No
36Year	3	0		having work	ART	Dichorionic	36	11.3	Yes	Diet	Sjogren's syndrome	No	Undergraduate course	163	69.3	21.8	3.17	209	108	0.312	7.34	2.53	35.3	249	42	18	178	No	Yes	No	No					36	cesarean section	twin pregnancy	No	No	No	No	2200	2500	XX	No	No	One baby had admission to NICU	No
28Year	3	1	4	having work	Spontaneous	Dichorionic	36	4	Yes	Diet	No	No	Junior college	160	82	30.4	4.11	241	123	0.356	6.68	2.52	36.7	290	40	10	163	Yes	No	Yes	Yes	36	153	87	579	36	cesarean section	twin pregnancy，Severe ICP	No	No	No	No	2420	2480	XY	No	No	One baby had admission to NICU	One baby had
32Year	1	0		having work	ART	Dichorionic	33	9	Yes	Diet	No	No	polytechnic school	160	60	19.9	3.28	163	106	0.32	6.39	3.35	35.5	263	36	18	168	Yes	Yes	No	No					33	cesarean section	Placental abruption	Yes	No	Yes	No	1620	1630	XX	One baby had	No	Two babies had admission to NICU	No
37Year	3	1	3	having work	Spontaneous	Dichorionic	37	12.4	Yes	Diet	No	No	Undergraduate course	157	67.4	22.3	3.63	193	118	0.339	6.34	4.04	36.9	228	36	24	168	No	No	No	No					37	cesarean section	twin pregnancy	No	No	No	No	2420	2400	XX	No	No	Two babies had admission to NICU	No
27Year	2	0		having work	Spontaneous	Dichorionic	36	20.6	Yes	Diet	No	No	Undergraduate course	169	85.6	22.7	3.87	194	112	0.349	6.52	4.38	36	254	41	14	166	Yes	No	No	No					36	cesarean section	twin pregnancy	No	No	No	No	2490	2670	XY	No	No	No	No
37Year	2	0		having work	ART	Dichorionic	37	21	Yes	Diet	No	No	Undergraduate course	163	72.5	19.3	3.48	279	112	0.324	6.8	3.81	35.3	298	44	13	150	No	Yes	No	No					38	cesarean section	twin pregnancy	Yes	Yes	No	No	2370	2910	XY	No	No	No	No
33Year	2	1	10	no work	Spontaneous	Dichorionic	36	14	Yes	Diet	No	No	High school	165	67	19.4	3.36	179	104	0.32	5.17	2.19	32.4	272	47	25	132	No	No	No	No					36	cesarean section	twin pregnancy，Scarred uterus	No	No	No	No	2270	2580	XX	No	No	One baby had admission to NICU	No
30Year	1	0		having work	ART	Dichorionic	37	27	Yes	Diet	No	No	Undergraduate course	164	75	17.8	3.84	265	115	0.35	6.56	2.43	34.2	303	51	10	129	No	No	No	No					37	cesarean section	twin pregnancy	No	No	No	No	2390	2770	XX	No	No	No	No
35Year	1	0		having work	ART	Dichorionic	37	17	Yes	Diet	No	No	Undergraduate course	159	63	18.1	3.32	172	104	0.311	6.65	2.67	33.1	292	58	10	150	No	No	No	No					37	cesarean section	twin pregnancy	No	No	No	No	2570	2950	YY	No	No	No	No
27Year	3	1	5	no work	Spontaneous	Monochorionic	32	12	Yes	Diet	No	No	Middle school	149	55	20.1	3.71	230	117	0.359	7.71	4.15	29.5	213	52	19	184	Yes	No	No	No					32	cesarean section	twin pregnancy，Scarred uterus	No	No	No	No	2200	2310	YY	No	No	Two babies had admission to NICU	Two babies had
31Year	1	0		having work	ART	Dichorionic	35	12	Yes	Diet	No	Yes	Junior college	162	59.5	18	3.54	186	102	0.323	5.91	1.45	37.7	306	48	20	137	No	No	No	No					35	cesarean section	Acute fatty liver of pregnancy	Yes	Yes	No	No	1930	2195	XY	No	No	Two babies had admission to NICU	One baby had
36Year	2	0		having work	ART	Dichorionic	34	13.1	Yes	Diet	No	Yes	postgraduate	160	73.1	21.2	4.28	178	130	0.388	6.09	3.27	35.8	212	43	10	144	Yes	No	No	No					34	cesarean section	twin pregnancy	No	No	No	No	2640	2140	XY	No	No	Two babies had admission to NICU	No
33Year	7	0		no work	ART	Dichorionic	37	15.9	Yes	Diet	No	No	Junior college	157	58.9	17.4	3.8	209	120	0.362	7.49	2.29	34.7	253	52	14	162	No	No	No	No					37	cesarean section	twin pregnancy	No	No	No	No	2550	2800	XY	No	No	No	No
39Year	7	2	11	no work	ART	Dichorionic	32	12	Yes	Diet	No	No	High school	150	64	23.1	4.18	193	145	0.437	6.54	6.92	32.7	411	46	9		Yes	No	No	No					33	cesarean section	twin pregnancy，Scarred uterus	No	No	No	No	2200	1890	XY	No	No	Two babies had admission to NICU	No
32Year	4	1	6	no work	Spontaneous	Monochorionic	35	20.5	Yes	Diet	No	No	postgraduate	163	63	15.9	3.99	218	126	0.374	4.88	2.11	36.2	301	53	18	146	Yes	No	No	No					35	cesarean section	twin pregnancy	No	No	No	No	2430	1960	YY	No	No	Two babies had admission to NICU	No
32Year	2	0		having work	ART	Dichorionic	35	22.2	Yes	Diet	No	No	Undergraduate course	162	85	23.9	3.7	156	126	0.361	7.19	3.27	35.4	233	37	15	186	Yes	No	No	No					36	cesarean section	twin pregnancy	No	No	No	No	2830	2720	YY	No	No	One baby had admission to NICU	No
37Year	2	1	8	having work	Spontaneous	Monochorionic	32	29	No	Diet	No	No	Junior college	165	84	20.2	4.02	235	114	0.348	7.57	2.48	34.9	301	57	13	215	Yes	No	No	No					32	cesarean section	twin pregnancy，Scarred uterus	No	No	No	No	2960	2860	XX	No	No	Two babies had admission to NICU	No
28Year	1	0		having work	ART	Dichorionic	37	12	No	Diet	No	No	Undergraduate course	158	60	19.2	3.72	199	114	0.351	7.79	2.4	35	244	61	13	191	No	No	No	No					37	cesarean section	twin pregnancy	No	No	No	No	2800	2200	XY	No	No	One baby had admission to NICU	No
34Year	3	0		having work	ART	Dichorionic	35	15.8	No	Diet	No	No	Junior college	158	63.8	19.2	3.58	172	114	0.343	6.9	3.42	35.8	247	55	9	160	No	No	No	No					36	cesarean section	twin pregnancy	No	No	No	No	2640	2630	XY	No	No	One baby had admission to NICU	No
34Year	1	0		no work	ART	Dichorionic	33	18.5	No	Diet	No	Yes	Junior college	166	75.5	20.6	3.55	157	116	0.323	8.63	5.89	33.5	369	60	8	149	Yes	No	Yes	Yes	33	145	99	644	35	cesarean section	severe preeclampsia	No	No	No	No	2270	2040	YY	No	No	Two babies had admission to NICU	Two babies had
33Year	2	1	5	having work	ART	Dichorionic	36	20	No	Diet	No	No	Junior college	166	78	21	3.58	187	109	0.34	5.92	2.64	32.4	211	47	11	134	No	No	No	No					36	cesarean section	twin pregnancy	No	No	No	No	3000	2700	XY	No	No	No	No
32Year	1	0		having work	Spontaneous	Monochorionic	37	19	No	Diet	No	No	Undergraduate course	173	71	17.3	3.99	239	125	0.384	6.75	1.86	34.5	237	62	16	152	No	No	No	No					37	cesarean section	twin pregnancy	No	No	No	No	2400	2130	XX	No	No	One baby had admission to NICU	One baby had
30Year	3	0		having work	Spontaneous	Monochorionic	33	18.9	No	Diet	No	No	Undergraduate course	158	78.9	24	3.34	251	117	0.343	6.86	2.31	32.8	254	60	15	159	Yes	No	No	No					33	cesarean section	TTTS	No	No	No	No	1900	2400	YY	No	No	Two babies had admission to NICU	Two babies had
27Year	1	0		having work	Spontaneous	Monochorionic	32	18.5	No	Diet	No	No	Undergraduate course	155	62.5	18.3	3.66	169	124	0.378	5.07	3.7	30.6	351	56	7	114	Yes	No	No	No					33	cesarean section	Fetal distress	No	No	No	No	1975	1350	YY	No	No	Two babies had admission to NICU	No
30Year	1	0		having work	ART	Dichorionic	36	15	No	Diet	No	No	Junior college	167	105	32.2	4.45	209	140	0.413	7.24	4.01	36.8	256	56	6		No	No	No	No					36	cesarean section	twin pregnancy	Yes	Yes	No	No	3100	3330	YY	No	No	No	No
33Year	2	0		having work	ART	Dichorionic	35	32.2	No	Diet	No	No	Undergraduate course	159	86.2	21.3	3.54	281	107	0.32	7.55	2	34.9	314	60	17	168	Yes	No	Yes	Yes	35	142	91	808	35	cesarean section	twin pregnancy	No	No	Yes	No	2700	2340	XY	No	No	One baby had admission to NICU	No
28Year	2	0		no work	Spontaneous	Dichorionic	37	22	No	Diet	No	No	Undergraduate course	161	73	19.1	3.91	228	123	0.372	7.5	2.57	36.7	248	62	11	150	No	No	No	No					37	cesarean section	twin pregnancy	No	No	No	No	2100	2400	XX	No	No	One baby had admission to NICU	No
28Year	1	0		having work	Spontaneous	Monochorionic	36	12.5	No	Diet	No	No	Junior college	157	66.5	20.8	3.78	172	120	0.355	6.42	2.77	34.4	229	54	18	159	No	No	No	No					35	cesarean section	twin pregnancy	No	No	No	No	2380	1950	XX	No	No	One baby had admission to NICU	One baby had
23Year	1	0		no work	Spontaneous	Monochorionic	34	19.9	No	Diet	No	No	Junior college	160	68.4	18.9	3.93	288	122	0.363	5.4	1.85	34	184	50	14	214	Yes	No	No	No					35	cesarean section	twin pregnancy	No	No	Yes	No	2250	2070	XX	No	No	Two babies had admission to NICU	No
26Year	3	1	8	no work	Spontaneous	Monochorionic	36	15.5	No	Diet	No	No	High school	160	75	23.4	3.77	134	118	0.355	6.02	1.55	35.6	226	50	28	158	No	No	No	No					36	cesarean section	twin pregnancy	No	No	No	No	2400	2500	XX	No	No	No	No
26Year	1	0		having work	Spontaneous	Monochorionic	36	11.2	No	Diet	No	No	Undergraduate course	168	63.5	19.4												Yes	No	Yes	No					36	cesarean section	twin pregnancy，Pregnancy induced hypertension	No	No	No	No	2170	2400	XX	No	No	One baby had admission to NICU	No
32Year	1	0		having work	Spontaneous	Monochorionic	36	23	No	Diet	No	No	polytechnic school	152	67	19	3.27	184	106	0.313	7.6	2.32	32.5	193	54	9	133	No	No	No	No					36	cesarean section	twin pregnancy	No	No	No	No	2150	2350	XX	No	No	One baby had admission to NICU	No
30Year	3	0		no work	ART	Dichorionic	32	10	No	Diet	No	No	High school	160	63.9	17.9	3.66	258	112	0.344	7.12	2.18	37	122	52	9	125	Yes	No	No	No					32	cesarean section	oligohydramnios	No	No	No	No	1700	1610	XY	No	No	Two babies had admission to NICU	No
31Year	1	0		having work	ART	Dichorionic	32	9.7	No	Diet	No	No	Undergraduate course	155	57.1	22.8	3.69	213	114	0.346	7.42	3.15	34.8	247	60	12	133	Yes	No	Yes	Yes	30	135	93	2391	34	cesarean section	twin pregnancy	No	No	No	No	1850	1760	YY	No	No	Two babies had admission to NICU	One baby had
32Year	2	1	6	having work	Spontaneous	Dichorionic	36	20.2	No	Diet	No	No	Undergraduate course	162	73.2	20.1	3.82	198	115	0.352	6.66	3.09	34.9	220	50	6	156	No	No	No	No					37	cesarean section	twin pregnancy	No	No	No	No	2800	2750	YY	No	No	No	No
25Year	1	0		no work	Spontaneous	Monochorionic	35	10	No	Diet	No	No	postgraduate	165	65	19.4	3.4	179	106	0.324	5.93	1.76	35.2	221	55	13	173	No	No	No	No					35	cesarean section	twin pregnancy	No	No	Yes	No	2150	1450	XX	No	No	Two babies had admission to NICU	No
30Year	2	1	2	having work	Spontaneous	Dichorionic	34	14.9	No	Diet	No	No	postgraduate	157	78.9	25.1	3.52	334	104	0.322	7.74	3.08	34.5	196	51	5	168	No	No	No	No					34	cesarean section	twin pregnancy	No	No	No	No	1960	2100	XX	No	No	Two babies had admission to NICU	No
26Year	2	0		no work	ART	Dichorionic	36	13	No	Diet	No	No	Undergraduate course	162	75	23.6	4.44	159	123	0.378	5.91	4.34	35.9	261	61	26	138	No	No	No	No					36	cesarean section	twin pregnancy	No	No	Yes	No	2300	2860	YY	No	No	One baby had admission to NICU	No
25Year	1	0		having work	Spontaneous	Monochorionic	35	18.5	No	Diet	No	Yes	Junior college	156	62.5	18	3.37	174	103	0.314	5.66	1.17	34	158	50	16	151	No	No	No	No					35	cesarean section	twin pregnancy	No	No	No	No	2220	2200	YY	No	No	Two babies had admission to NICU	No
31Year	1	0		having work	Spontaneous	Monochorionic	35	16.7	No	Diet	No	No	postgraduate	168	75.4	20.7	3.81	179	118	0.343	7.24	1.97	33.2	353	64	17	166	Yes	No	No	No					35	cesarean section	twin pregnancy	No	No	No	No	2700	2600	YY	No	No	Two babies had admission to NICU	Two babies had
29Year	1	0		having work	ART	Dichorionic	37	22	No	Diet	No	No	Junior college	167	83	21.8	4.1	239	125	0.375	7.19	2.38	35	228	57	42	157	No	No	No	No					37	cesarean section	twin pregnancy	No	No	Yes	No	2715	2600	YY	No	No	No	No
30Year	1	0		having work	ART	Dichorionic	36	17.5	No	Diet	No	No	High school	161	75	22.1	4.18	213	133	0.398	6.75	3.14	34.9	232	52	5	170	No	No	No	No					37	cesarean section	twin pregnancy	No	No	No	No	2450	2750	YY	No	No	No	No
27Year	1	0		having work	Spontaneous	Monochorionic	36	11.6	No	Diet	No	No	Undergraduate course	161	68.3	21.9	3.61	312	113	0.34	5.62	2.19	32.9	194	61	11	146	No	No	No	No					36	cesarean section	twin pregnancy	No	No	No	No	2000	2300	YY	No	No	Two babies had admission to NICU	No
29Year	2	0		having work	ART	Dichorionic	36	16	No	Diet	No	No	Undergraduate course	165	61	16.5	3.53	157	110	0.333	9.82	3.12	37.8	253	53	8	144	No	No	No	No					36	cesarean section	twin pregnancy	No	No	No	No	3050	2700	YY	No	No	No	No
31Year	1	0		having work	ART	Dichorionic	32	22	No	Diet	No	No	Undergraduate course	161	69	18.1	3.63	144	128	0.381	6.53	2.2	35.4	289	54	12	134	Yes	No	Yes	Yes	32	178	94	1606	32	cesarean section	severe preeclampsia	No	Yes	No	No	1990	2150	XX	No	No	Two babies had admission to NICU	Two babies had
37Year	3	0		no work	ART	Dichorionic	36	23.6	No	Diet	No	No	Middle school	170	81.6	20	3.76	115	120	0.374	6.46	1.95	37.2	212	55	14	153	No	No	No	No					36	cesarean section	twin pregnancy	Yes	No	No	No	2350	2600	YY	No	No	No	No
27Year	1	0		having work	Spontaneous	Monochorionic	31	12	No	Diet	No	No	Undergraduate course	152	51	16.8	3.35	202	103	0.314	8.77	2.92	35.8	214	43	8	141	Yes	No	No	No					33	cesarean section	Vasa previa	No	No	Yes	No	1248	1640	XX	No	No	Two babies had admission to NICU	No
28Year	1	0		having work	Spontaneous	Monochorionic	35	16.4	No	Diet	No	No	Junior college	163	63.8	17.8	3.3	190	102	0.313	6.97	3.45	35.5	261	53	15	142	No	No	No	No					35	cesarean section	Selective fetal growth restriction	No	No	Yes	No	2320	1520	YY	No	No	Two babies had admission to NICU	One baby had
29Year	2	1	3	having work	Spontaneous	Dichorionic	35	12	No	Diet	No	No	Undergraduate course	155	59	19.5	3.67	199	116	0.364	7.11	4.2	33.6	225	50	14	135	Yes	No	No	No					35	cesarean section	twin pregnancy	No	No	Yes	No	2430	2040	XY	No	No	Two babies had admission to NICU	One baby had
33Year	2	1	3	no work	ART	Dichorionic	36	19	No	Diet	No	No	Middle school	170	78.4	20.5	3.74	153	121	0.366	6.26	2.77	32.1	216	50	12	129	No	No	No	No					36	cesarean section	twin pregnancy，Scarred uterus	No	No	No	No	2070	2940	YY	No	No	One baby had admission to NICU	No
29Year	3	0		having work	ART	Dichorionic	35	17.6	No	Diet	No	No	Undergraduate course	161	67.6	19.2	3.75	280	115	0.351	7.94	4.69	29.1	322	58	19	133	No	Yes	No	No					35	cesarean section	twin pregnancy	No	No	No	No	2450	2610	YY	No	No	One baby had admission to NICU	One baby had
32Year	1	0		having work	Spontaneous	Monochorionic	36	16	No	Diet	No	No	Undergraduate course	167	66	17.9	3.55	187	119	0.352	5.73	1.57	35.8	199	53	13	169	No	No	No	No					36	cesarean section	twin pregnancy	No	No	No	No	2980	2630	YY	No	No	No	No
26Year	1	0		having work	Spontaneous	Dichorionic	37	21.6	No	Diet	No	No	Undergraduate course	159	61.6	15.8	3.71	204	118	0.367	5.96	2.01	35.3	263	54	8	136	No	No	No	No					37	cesarean section	twin pregnancy	No	No	No	No	2300	1970	YY	No	No	One baby had admission to NICU	No
30Year	3	1	5	having work	Spontaneous	Dichorionic	38	15.2	No	Diet	No	No	Undergraduate course	162	67.2	19.8	3.83	196	122	0.375	6.59	1.74	36.4	240	53	11	153	No	No	No	No					38	cesarean section	Scarred uterus	No	No	No	Yes	3150		YY	No	No	No	No
28Year	3	1	8	having work	Spontaneous	Dichorionic	37	24.6	No	Diet	No	No	Undergraduate course	160	84.6	23.4	4.21	322	97	0.312	6.14	1.7	34.6	321	57	11		No	No	No	No					37	cesarean section	twin pregnancy	No	No	No	No	2860	2520	YY	No	No	No	No
33Year	2	1	5	having work	Spontaneous	Monochorionic	36	10.7	No	Diet	No	Yes	Undergraduate course	159	68.7	22.9	3.94	168	116	0.355	6.9	3.29	37.2	215	56	7	134	No	No	No	No					36	cesarean section	twin pregnancy	No	No	No	No	2010	2530	XX	No	No	One baby had admission to NICU	No
29Year	2	0		having work	ART	Monochorionic	36	21.7	No	Diet	No	Yes	Junior college	158	63.7	16.8	3.27	184	112	0.336	6.78	1.31	38.8	200	49	16	127	No	No	No	No					36	cesarean section	twin pregnancy	No	No	No	No	2480	2300	YY	No	No	No	No
35Year	2	1	7	having work	Spontaneous	Monochorionic	35	10.7	No	Diet	No	No	Undergraduate course	167	60.7	17.9	3.07	212	103	0.313	3.19	3.69	33.7	196	47	7	136	No	No	No	No					35	cesarean section	twin pregnancy	No	No	No	No	2180	1980	XX	No	No	Two babies had admission to NICU	No
32Year	2	0		having work	ART	Dichorionic	33	14.9	No	Diet	No	No	Undergraduate course	155	74.9	24.9	3.69	215	117	0.347	7.4	2.42	36.9	217	50	31	160	Yes	No	No	No					34	cesarean section	polyhydramnios	No	No	No	No	2230	1790	XY	One baby had	No	Two babies had admission to NICU	No
25Year	3	0		having work	ART	Monochorionic	36	15.5	No	Diet	No	No	Undergraduate course	158	63.5	19.2	3.62	211	109	0.332	5.91	2.87	34.4	187	50	14	146	No	No	No	No					37	cesarean section	twin pregnancy	No	No	No	No	2350	2630	YY	No	No	No	No
32Year	3	1	14	no work	Spontaneous	Dichorionic	36	25.5	No	Diet	No	No	Junior college	163	83	21.6	3.28	180	103	0.319	6.35	2.81	31.7	295	49	9	162	No	No	No	No					36	cesarean section	twin pregnancy	No	No	No	No	2970	2370	XX	One baby had	No	Two babies had admission to NICU	No
33Year	1	0		having work	ART	Dichorionic	32	12.2	No	Diet	No	No	Undergraduate course	165	66.2	19.8	3.22	225	100	0.302	9.27	1.89	34.6	207	54	16	148	Yes	No	No	No					32	cesarean section	twin pregnancy	No	No	No	No	2050	1650	XX	No	No	Two babies had admission to NICU	No
31Year	1	0		having work	ART	Dichorionic	37	14.6	No	Diet	No	No	Junior college	160	69	21.3	3.43	221	110	0.33	7.65	2.37	35	292	77	8	176	Yes	No	No	No					37	cesarean section	twin pregnancy	No	No	No	No	2450	2170	XY	No	No	Two babies had admission to NICU	No
27Year	1	0		no work	Spontaneous	Monochorionic	36	14.5	No	Diet	No	No	Undergraduate course	159	66.5	20.5	3.26	187	110	0.315	6.65	1.81	34.9	248	52	8	139	No	No	No	No					37	cesarean section	twin pregnancy	No	No	No	No	2750	2650	XX	No	No	Two babies had admission to NICU	No
30Year	1	0		having work	ART	Dichorionic	37	15.7	No	Diet	No	No	Undergraduate course	158	67.7	20.8	3.63	250	112	0.345	6.24	3.91	34.2	226	54	2	175	No	No	No	No					37	cesarean section	twin pregnancy	No	No	No	No	2300	2700	XX	No	No	One baby had admission to NICU	One baby had
29Year	1	0		having work	Spontaneous	Dichorionic	35	21	No	Diet	No	No	Undergraduate course	165	79.8	22.1	3.34	199	104	0.322	6.98	3.06	35.5	226	48	13	126	No	No	No	No					35	cesarean section	Severe ICP	No	No	No	No	2630	2170	YY	No	No	One baby had admission to NICU	No
26Year	1	0		having work	Spontaneous	Monochorionic	36	22.5	No	Diet	No	No	Undergraduate course	166	75.8	19.6	3.85	235	126	0.372	6.93	1.77	37.6	317	62	64	155	No	No	No	No					36	cesarean section	twin pregnancy	No	No	No	No	2350	2490	YY	No	No	No	No
22Year	3	1	2	having work	Spontaneous	Monochorionic	36	17	No	Diet	No	No	Middle school	158	69	20.8	4.26	181	124	0.391	6.35	2.37	33.3	264	50	17	124	Yes	No	No	No					36	cesarean section	twin pregnancy	No	No	No	No	2010	1930	XX	No	No	Two babies had admission to NICU	No
28Year	1	0		having work	ART	Dichorionic	37	11	No	Diet	No	No	Junior college	158	68	22.8	3.69	162	123	0.379	6.97	7.84	37	332	64	9	149	No	No	No	No					37	cesarean section	twin pregnancy	No	No	No	No	2080	2760	XY	No	No	One baby had admission to NICU	No
34Year	3	1	5	no work	Spontaneous	Dichorionic	37	13.5	No	Diet	No	No	Junior college	165	67.5	19.8	3.77	209	111	0.34	5.34	2.9	32.3	310	63	6	141	No	No	No	No					37	cesarean section	twin pregnancy	No	No	No	No	2550	2650	XY	No	No	No	No
27Year	1	0		having work	Spontaneous	Monochorionic	36	15.9	No	Diet	No	Yes	Undergraduate course	165	65.9	18.3												No	No	No	No					37	cesarean section	twin pregnancy	No	No	Yes	No	1900	1970	YY	No	No	Two babies had admission to NICU	Two babies had
27Year	1	0		having work	ART	Dichorionic	27	9	No	Diet	Antiphospholipid antibody syndrome	Yes	Junior college	160	56	18.3	4.09	263	124	0.386	7.9	2.48	33.1	314	49	42	140	Yes	No	No	No					28	cesarean section	twin pregnancy	No	No	No	No	1030	730	YY	Two babies had	No	Two babies had admission to NICU	One baby had
35Year	1	0		having work	ART	Dichorionic	37	14.5	No	Diet	No	No	Master	171	70.5	18.8	3.85	188	118	0.36	6.98	1.7	35.3	191	55	13	161	No	No	No	No					38	cesarean section	twin pregnancy	No	No	No	No	2900	2650	YY	No	No	One baby had admission to NICU	No
27Year	1	0		having work	Spontaneous	Monochorionic	36	13.8	No	Diet	No	No	Undergraduate course	157	65.8	21	3.38	263	106	0.321	5.79	1.82	33.9	308	62	31	122	No	No	No	No					36	cesarean section	twin pregnancy	No	No	No	No	2070	1860	YY	No	No	Two babies had admission to NICU	No
27Year	1	0		having work	Spontaneous	Dichorionic	36	15.5	No	Diet	No	No	Undergraduate course	160	64.5	19.1	3.76	250	109	0.335	5.99	2.03	35.1	242	50	12	171	No	No	No	No					36	vaginal delivery		No	No	No	No	2220	2710	XX	No	No	One baby had admission to NICU	No
26Year	1	0		having work	Spontaneous	Dichorionic	36	7.8	No	Diet	No	No	Undergraduate course	155	56.3	19.9	3.47	354	107	0.327	4.61	2.28	33.2	240	54	11	137	No	No	No	No					37	cesarean section	twin pregnancy	No	No	No	No	2420	2310	YY	No	No	No	No
33Year	1	0		having work	ART	Dichorionic	37	12	No	Diet	No	No	Undergraduate course	161	66.5	21	3.86	172	119	0.359	8.07	2.76	33.5	200	50	27	170	No	Yes	No	No					37	cesarean section	twin pregnancy	No	No	No	No	2550	2750	XX	No	No	No	No
32Year	2	1	3	having work	ART	Dichorionic	36	16	No	Diet	No	No	Junior college	162	85	26.2	3.81	146	105	0.331	5.65	3.21	33.5	291	46	12	182	No	No	No	No					36	cesarean section	twin pregnancy	No	No	No	No	2860	2470	YY	No	No	No	No
34Year	1	0		having work	ART	Dichorionic	36	16	No	Diet	No	No	Undergraduate course	158	79	25.2	3.66	244	118	0.356	6.47	2.69	35.1	278	65	31	221	No	No	No	No					36	cesarean section	twin pregnancy	No	No	No	No	3000	2530	XY	No	No	One baby had admission to NICU	No
27Year	1	0		having work	Spontaneous	Monochorionic	35	22	No	Diet	No	No	Undergraduate course	155	76	22.4	3.55	213	114	0.342	5.94	2.3	32.9	260	54	10	161	No	No	No	No					35	cesarean section	Selective fetal growth restriction	No	No	No	No	2280	2080	YY	No	No	Two babies had admission to NICU	One baby had
38Year	4	1	9	having work	Spontaneous	Dichorionic	36	11.9	No	Diet	No	No	Undergraduate course	160	67.4	21.6	3.47	199	117	0.353	5.41	4.45	33.6	264	56	4	127	No	No	No	No					36	cesarean section	twin pregnancy	No	No	No	No	2520	2360	XY	No	No	No	No
37Year	3	1	10	having work	Spontaneous	Monochorionic	33	15	No	Diet	No	No	Junior college	165	73	21.3	3.38	151	108	0.323	4.48	2.7	32.8	244	51	14	145	Yes	No	No	No					33	cesarean section	twin pregnancy	No	No	No	No	1800	1650	XX	One baby had	No	Two babies had admission to NICU	No
33Year	1	0		having work	ART	Dichorionic	37	13.6	No	Diet	No	No	Junior college	164	77.6	23.7	4.04	201	118	0.359	8.66	2.26	35.9	306	67	10	169	No	No	Yes	No					37	cesarean section	twin pregnancy	No	No	Yes	No	2500	3030	YY	No	No	No	No
26Year	1	0		having work	Spontaneous	Monochorionic	29	11.4	No	Diet	No	No	Undergraduate course	155	59.4	19.9	3.71	237	119	0.368	8.14	4.16	32.5	227	47	43	158	Yes	No	No	No					29	cesarean section	Fetal distress	No	No	No	No	1350	990	YY	One baby had	No	Two babies had admission to NICU	No
28Year	3	0		having work	ART	Dichorionic	36	20	No	Diet	No	No	High school	162	74	20.8	3.13	276	93	0.291	6.52	4.3	31.7	360	48	7	158	No	No	No	No					36	cesarean section	twin pregnancy	No	No	No	No	3030	2820	YY	No	No	No	No
27Year	2	1	3	having work	Spontaneous	Dichorionic	37	11.5	No	Diet	No	Yes	Middle school	167	81	24.9	3.77	131	119	0.362	6.59	5.1	35.4	328	56	6	130	No	No	No	No					37	cesarean section	twin pregnancy	No	No	No	No	2800	2560	XY	No	No	No	No
24Year	1	0		having work	Spontaneous	Monochorionic	36	23.5	No	Diet	No	No	High school	166	81.5	21	3.44	198	111	0.33	6.84	1.29	31.8	218	48	30	192	No	No	No	No					36	cesarean section	twin pregnancy	No	No	No	No	2360	2550	YY	No	No	Two babies had admission to NICU	No
28Year	1	0		having work	ART	Dichorionic	34	25	No	Diet	No	No	Junior college	165	70	16.5	3.47	274	101	0.313	7.55	1.9	35.5	252	57	7	169	Yes	No	Yes	Yes	35	140	91	532	35	cesarean section	twin pregnancy	No	No	Yes	No	2290	1570	XX	No	No	Two babies had admission to NICU	No
30Year	1	0		having work	ART	Dichorionic	36	26.7	No	Diet	No	No	Undergraduate course	164	88.7	23	3.85	242	113	0.345	9.17	2.82	33.9	179	44	9	136	No	No	No	No					36	cesarean section	twin pregnancy	No	No	No	No	2550	2370	XY	No	No	One baby had admission to NICU	No
24Year	1	0		having work	Spontaneous	Monochorionic	33	8	No	Diet	No	No	Junior college	164	56	17.4	3.24	255	107	0.323	7.15	2.45	36.1	201	48	7	159	No	No	No	No					34	cesarean section	twin pregnancy	No	No	No	No	1832	1900	YY	No	No	Two babies had admission to NICU	Two babies had
29Year	1	0		having work	Spontaneous	Monochorionic	33	15.5	No	Diet	No	No	Undergraduate course	154	63.5	20.2	3.67	164	112	0.339	5.96	1.78	32.5	207	50	13	131	Yes	No	No	No					34	cesarean section	intrauterine infection	No	No	Yes	No	2170	2200	YY	No	No	Two babies had admission to NICU	One baby had
29Year	1	0		having work	Spontaneous	Dichorionic	36	20.6	No	Diet	No	No	Junior college	163	75.6	20.7	3.65	151	103	0.325	5.91	2.5	34.2	296	50	7	160	No	No	No	No					37	cesarean section	twin pregnancy	No	No	Yes	No	2930	3050	XY	No	No	No	No
25Year	2	0		having work	ART	Dichorionic	36	13	No	Diet	No	No	Undergraduate course	169	60	16.4	3.7	205	119	0.348	8.33	2.94	34.5	210	54	17	177	No	No	No	No					37	cesarean section	twin pregnancy	No	No	No	No	2400	2300	XX	No	No	No	No
31Year	2	0		having work	ART	Dichorionic	37	21.5	No	Diet	No	No	Undergraduate course	160	73.5	20.3	3.58	224	112	0.335	5.57	1.81	37.1	230	53	11	138	No	No	No	No					37	cesarean section	twin pregnancy	No	No	Yes	No	2800	2380	XY	No	No	One baby had admission to NICU	No
33Year	3	1	13	having work	ART	Dichorionic	36	15.9	No	Diet	No	No	Undergraduate course	157	62.9	19	3.81	317	107	0.336	5.31	4.08	34.9	311	52	4	117	No	No	No	No					37	cesarean section	twin pregnancy	No	No	No	No	2300	2430	XY	No	No	No	No
32Year	3	0		having work	ART	Dichorionic	36	15.3	No	Diet	No	No	Undergraduate course	155	65.3	20.8	3.77	220	108	0.333	5.89	3.24	34.2	279	53	6	142	Yes	No	No	No					37	cesarean section	twin pregnancy	No	No	No	No	2220	2060	XY	No	No	Two babies had admission to NICU	No
26Year	1	0		no work	Spontaneous	Dichorionic	36	14.5	No	Diet	No	Yes	Undergraduate course	163	63.7	18.5	3.59	185	122	0.367	6.2	1.49	36.9	262	56	54	167	No	No	No	No					36	cesarean section	twin pregnancy	No	No	No	No	1930	1920	YY	No	No	Two babies had admission to NICU	No
29Year	1	0		having work	Spontaneous	Dichorionic	36	12.4	No	Diet	No	Yes	Undergraduate course	168	83.5	25.1	3.5	184	106	0.318	7.34	2.63	35	258	54	14	143	No	No	No	No					37	cesarean section	twin pregnancy	No	No	Yes	No	2800	2500	YY	No	No	One baby had admission to NICU	No
26Year	1	0		having work	Spontaneous	Monochorionic	32	5.5	No	Diet	No	No	Undergraduate course	158	55.5	20	3.5	220	109	0.338	7.67	2.48	33.7	434	43	13	179	Yes	No	No	No					34	cesarean section	Severe ICP	No	No	No	No	1820	1850	XX	No	No	Two babies had admission to NICU	No
28Year	2	0		having work	ART	Dichorionic	36	17	No	Diet	No	No	Junior college	154	69	21.9	3.54	259	99	0.303	7.7	3.69	36.3	255	54	8	186	No	No	No	No					37	cesarean section	twin pregnancy	No	No	No	No	2450	2900	XY	No	No	One baby had admission to NICU	No
30Year	1	0		having work	Spontaneous	Dichorionic	37	19	No	Diet	No	No	Undergraduate course	162	69	19	3.5	194	106	0.326	6.19	2.05	36.2	303	59	9	168	No	No	No	No					38	cesarean section	twin pregnancy	No	No	No	No	2650	2550	XX	No	No	No	No
29Year	1	0		having work	Spontaneous	Monochorionic	31	13	No	Diet	No	No	Undergraduate course	156	62.5	20.3	3.52	213	115	0.352	7.16	5.23	34.5	172	46	13	162	Yes	No	No	No					34	cesarean section	twin pregnancy	No	No	No	No	2220	2630	YY	No	No	Two babies had admission to NICU	No
24Year	1	0		no work	Spontaneous	Monochorionic	36	9	No	Diet	No	No	Junior college	158	54	18	3.48	181	107	0.337	5.57	2.86	36.1	387	62	11	175	No	No	No	No					37	cesarean section	twin pregnancy	No	No	No	No	2120	1990	XX	No	No	Two babies had admission to NICU	No
29Year	2	0		having work	ART	Dichorionic	36	16	No	Diet	simple proteinuria	Yes	Undergraduate course	170	86	20.7	4	155	121	0.383	8.39	3.61	35.8	234	45	10	179	No	No	No	No					37	cesarean section	twin pregnancy	No	No	Yes	No	3040	3000	XY	No	No	No	No
31Year	3	1	5	having work	Spontaneous	Dichorionic	37	19.5	No	Diet	No	No	Undergraduate course	168	73.5	19.1	3.55	139	117	0.346	5.45	1.24	34.1	134	49	19	171	No	No	No	No					37	cesarean section	twin pregnancy	No	No	No	No	2700	2710	XY	No	No	No	No
29Year	2	0		having work	Spontaneous	Dichorionic	35	11.7	No	Diet	No	No	Undergraduate course	158	53.7	16.8	3.84	152	120	0.355	6.66	3.35	33.3	225	53	16	153	No	No	No	No					35	cesarean section	twin pregnancy	No	No	No	No	2480	2330	YY	No	No	Two babies had admission to NICU	No
32Year	1	0		having work	ART	Dichorionic	35	10.2	No	Diet	No	No	Undergraduate course	162	63.7	20.3	3.78	266	121	0.363	6.9	2.63	34.3	207	49	21	155	No	No	No	No					35	cesarean section	twin pregnancy	No	No	No	No	2120	2140	XY	No	No	Two babies had admission to NICU	No
34Year	4	0		having work	ART	Dichorionic	35	16.7	No	Diet	No	Yes	Undergraduate course	165	82	23.9	3.96	125	120	0.376	6.82	7.09	36.4	231	54	6	142	No	No	Yes	No					35	cesarean section	twin pregnancy	No	No	No	No	2550	2920	YY	No	No	No	No
34Year	2	0		no work	ART	Dichorionic	36	12	No	Diet	No	No	Junior college	160	72	23.4												No	No	No	No					37	cesarean section	twin pregnancy	No	No	No	No	2950	2550	XY	No	No	No	No
28Year	1	0		having work	Spontaneous	Monochorionic	36	13.1	No	Diet	No	No	Undergraduate course	153	72.6	25.4	3.56	258	113	0.352	6.65	1.55	37.3	185	51	9	139	No	No	No	No					36	cesarean section	twin pregnancy	No	No	Yes	No	2450	1930	XX	No	No	Two babies had admission to NICU	No
36Year	1	0		having work	ART	Dichorionic	35	20	No	Diet	No	Yes	Junior college	160	89	27.7	3.35	200	99	0.313	6.34	3.74	32.4	251	59	6	180	No	No	No	No					35	cesarean section	twin pregnancy	No	No	No	No	2850	3000	XX	No	No	Two babies had admission to NICU	No
32Year	1	0		no work	ART	Dichorionic	37	16.5	No	Diet	No	No	Junior college	165	69.5	19.4	3.42	297	105	0.327	7.37	4.07	33.2	231	50	25	150	No	No	No	No					37	cesarean section	twin pregnancy	No	No	No	No	2510	2500	YY	No	No	One baby had admission to NICU	No
29Year	1	0		having work	ART	Dichorionic	35	15	No	Diet	No	No	Undergraduate course	161	82	25.8	3.77	189	114	0.348	7.47	5.81	36.9	332	51	14	119	Yes	No	No	No					35	cesarean section	twin pregnancy	No	No	No	No	2680	2830	XY	No	No	Two babies had admission to NICU	No
30Year	1	0		having work	ART	Dichorionic	37	13.5	No	Diet	No	No	Undergraduate course	164	64.5	18.9	3.14	151	100	0.304	6.03	1.78	35.5	303	61	15	162	No	No	No	No					37	cesarean section	twin pregnancy	No	No	No	No	2650	2550	XY	No	No	No	No
29Year	1	0		having work	ART	Dichorionic	37	16	No	Diet	No	No	High school	160	77	23.4	3.97	137	128	0.386	6.89	2.14	28.4	241	49	89	183	No	No	No	No					37	cesarean section	twin pregnancy	No	No	No	No	2750	2800	XY	No	No	No	No
32Year	4	1	8	having work	Spontaneous	Monochorionic	35	18	No	Diet	No	Yes	Undergraduate course	160	54	20.5	3.49	204	109	0.337	6.58	2.66	34.3	421	65	9	161	No	No	No	No					35	cesarean section	TTTS	No	No	No	No	1700	2040	XX	No	No	Two babies had admission to NICU	No
32Year	2	1	1	having work	Spontaneous	Monochorionic	36	20	No	Diet	No	No	Junior college	158	70	20.4	3.67	151	120	0.371	8.02	2.02	33.9	270	53	9	171	No	No	No	No					36	cesarean section	Severe ICP	No	No	Yes	No	2540	2260	XX	No	No	One baby had admission to NICU	One baby had
40Year	1	0		having work	ART	Dichorionic	35	16	No	Diet	No	No	Junior college	161.5	80.1	24.5	4.42	203	134	0.405	6.56	2.59	31.7	297	46	14	151	No	No	Yes	Yes	35	151	92	724	36	cesarean section	twin pregnancy	No	No	Yes	No	2420	1820	YY	No	No	One baby had admission to NICU	No
29Year	1	0		having work	Spontaneous	Monochorionic	29	18.2	No	Diet	No	No	Junior college	160	66.1	18.7	4.11	248	124	0.386	7.91	4.77	28.6	310	58	20	176	Yes	No	Yes	Yes	29	147	96	3315	30	cesarean section	severe preeclampsia	Yes	Yes	No	No	1170	1300	YY	No	No	Two babies had admission to NICU	No
32Year	1	0		no work	ART	Dichorionic	37	16	No	Diet	No	No	Junior college	160	63.5	18.7	3.86	231	125	0.379	6.23	1.78	35.8	277	57	29	189	No	No	No	No					37	cesarean section	twin pregnancy	No	No	No	No	2630	2730	YY	No	No	No	No
35Year	2	1	3	having work	Spontaneous	Monochorionic	36	16	No	Diet	No	No	Undergraduate course	155	62	19.1	3.38	159	101	0.314	4.31	3.64	30.3	255	50	11	144	No	No	No	No					36	cesarean section	twin pregnancy	No	No	No	No	2600	2520	YY	No	No	No	No
28Year	1	0		having work	Spontaneous	Dichorionic	34	11.1	No	Diet	No	No	Undergraduate course	155	67.1	21.6	3.23	273	87	0.272	6.2	3.64	34	183	51	12	144	No	No	No	No					34	cesarean section	Prolapse of the cord	No	No	Yes	No	2040	2320	XY	No	No	Two babies had admission to NICU	Two babies had
33Year	1	0		having work	Spontaneous	Dichorionic	37	23	No	Diet	No	No	postgraduate	165	75	19.1	3.31	167	103	0.321	7.19	1.76	33.6	224	58	14	179	No	No	No	No					37	cesarean section	twin pregnancy	No	No	Yes	No	2500	2220	XX	No	No	One baby had admission to NICU	One baby had
26Year	2	0		having work	Spontaneous	Dichorionic	36	19.5	No	Diet	No	Yes	Junior college	157	68	19.6	3.31	288	111	0.331	9.73	1.66	34	277	45	10	172	No	No	No	No					36	cesarean section	twin pregnancy	No	No	No	No	2000	2300	XY	No	No	One baby had admission to NICU	No
32Year	1	0		having work	ART	Dichorionic	37	15	No	Diet	No	No	Junior college	164	84.1	25.5	3.74	133	110	0.332	5.75	2.64	34.9	162	51	13	163	No	No	No	No					37	cesarean section	twin pregnancy	Yes	No	No	No	2900	2850	XX	No	No	No	No
32Year	3	1	2	having work	Spontaneous	Monochorionic	36	13	No	Diet	No	No	Undergraduate course	161	65	20	3.13	126	102	0.31	6.94	1.91	34.1	183	46	7	131	No	No	No	No					36	cesarean section	twin pregnancy	No	No	No	No	2900	2950	XX	No	No	No	No
29Year	1	0		no work	ART	Dichorionic	34	11.5	No	Diet	No	No	Middle school	150	60	21.7	4.08	249	140	0.405	5.65	2.51	36.8	278	53	14	154	Yes	No	No	No					34	cesarean section	twin pregnancy	No	No	No	No	2100	1800	XX	No	No	Two babies had admission to NICU	Two babies had
33Year	2	0		having work	Spontaneous	Monochorionic	37	13.75	No	Diet	No	No	postgraduate	155	60.75	19.5	3.37	219	98	0.303	8.28	2.37	36.7	136	54	12	124	No	No	Yes	Yes	37	170	104	435	37	cesarean section	twin pregnancy	No	No	No	No	2480	2300	YY	No	No	No	No
31Year	3	1	8	no work	Spontaneous	Monochorionic	28	13	No	Diet	No	No	Junior college	156	56	17.6	4.06	181	133	0.395	6.9	2.7	33.1	398	59	10	185	Yes	Yes	Yes	Yes	28	141	91	1600	29	cesarean section	severe preeclampsia，TTTS	No	No	No	No	1140	550	XX	One baby had	Yes	Two babies had admission to NICU	No
26Year	2	0		having work	Spontaneous	Dichorionic	36	16	No	Diet	No	No	Junior college	163	65	18	3.06	181	99	0.303	6.02	2.96	34.4	268	52	11	160	No	No	No	No					36	cesarean section	twin pregnancy	No	No	No	No	2390	2310	XY	No	No	No	No
31Year	1	0		having work	ART	Dichorionic	37	23.2	No	Diet	No	Yes	Undergraduate course	165	77.2	19.8	3.28	215	101	0.301	6.79	2.73	33.8	155	44	24	132	No	No	No	No					37	cesarean section	twin pregnancy	No	No	No	No	3050	2550	XX	No	No	No	No
28Year	1	0		having work	Spontaneous	Dichorionic	37	19	No	Diet	No	No	Undergraduate course	172	83.9	21.9	3.83	211	118	0.36	6.33	2.11	36.6	266	62	9	147	No	No	No	No					37	cesarean section	twin pregnancy	No	No	No	No	3000	2450	XY	No	No	No	No
29Year	3	0		no work	Spontaneous	Dichorionic	37	21	No	Diet	No	No	High school	165	87	24.2	3.96	285	125	0.381	6.47	3.44	33	268	48	15	133	No	No	No	No					37	cesarean section	twin pregnancy	No	No	No	No	2800	2850	YY	No	No	No	No
27Year	1	0		having work	ART	Dichorionic	36	23	No	Diet	No	No	Undergraduate course	171	73	19	3.93	223	130	0.385	6.19	1.73	35.9	270	52	17	132	No	No	No	No					37	cesarean section	twin pregnancy	No	No	No	No	2400	2450	XY	No	No	No	No
29Year	6	0		no work	ART	Dichorionic	36	19	No	Diet	No	No	polytechnic school	158	60	16.6	3.42	243	111	0.335	9.48	4.56	34.9	239	51	14	122	Yes	No	No	No					36	cesarean section	twin pregnancy	No	No	No	No	2190	2290	XY	No	No	Two babies had admission to NICU	No
32Year	3	1	1	having work	Spontaneous	Dichorionic	38	9.9	No	Diet	No	No	High school	158	90.9	28.4	3.61	207	115	0.353	5.12	2.96	34.3	381	60	10	147	No	No	No	No					38	cesarean section	twin pregnancy	No	No	No	No	3300	2900	YY	No	No	One baby had admission to NICU	No
31Year	1	0		having work	Spontaneous	Dichorionic	34	14	No	Diet	No	No	postgraduate	155	69	22.8	4.01	237	130	0.378	8.26	1.91	37.4	215	52	21	172	No	No	No	No					34	cesarean section	twin pregnancy	No	No	No	No	1870	1860	YY	No	No	Two babies had admission to NICU	No
30Year	2	0		having work	ART	Dichorionic	34	21	No	Diet	No	No	Undergraduate course	153	86	27.7	3.82	190	113	0.353	5.64	2.21	34.7	371	54	9	137	Yes	No	No	No					33	cesarean section	twin pregnancy	No	No	No	No	1760	1950	XY	No	No	Two babies had admission to NICU	Two babies had
33Year	2	0		no work	ART	Dichorionic	35	14	No	Diet	No	Yes	Undergraduate course	160	57	17.1	3.66	166	122	0.369	7.46	3.86	30.2	250	50	9	164	Yes	No	No	No					36	cesarean section	twin pregnancy	No	No	Yes	No	2400	2120	XY	No	No	Two babies had admission to NICU	No
33Year	3	1	2	no work	Spontaneous	Dichorionic	37	13.2	No	Diet	No	No	Junior college	160	68.2	21.7	3.86	137	122	0.369	3.62	2.16	31.4	194	55	7	145	No	No	No	No					37	cesarean section	twin pregnancy	No	No	No	No	2400	2550	XX	No	No	No	No
36Year	4	1	11	having work	Spontaneous	Dichorionic	33	19.5	No	Diet	No	No	Undergraduate course	156	63	17.8	4.18	310	126	0.383	9.98	4.02	36.8	218	54	8	165	Yes	No	Yes	No					33	cesarean section	twin pregnancy，Scarred uterus	Yes	No	No	No	1440	1570	XX	No	No	Two babies had admission to NICU	No
25Year	3	1	5	having work	Spontaneous	Dichorionic	36	23	No	Diet	No	No	Middle school	158	77	21.6	3.54	271	105	0.327	6.88	2.32	31.8	239	50	13	152	No	No	No	No					35	cesarean section	twin pregnancy，Scarred uterus	No	No	No	No	2580	2340	YY	No	No	No	No
29Year	2	0		no work	ART	Dichorionic	35	19.7	No	Diet	No	No	Junior college	150	69.7	21.6												No	No	No	No					36	cesarean section	Severe ICP	No	No	Yes	No	2800	2480	XY	No	No	No	No
25Year	2	0		having work	ART	Dichorionic	37	24	No	Diet	No	No	Middle school	163	75	19.1	4.33	229	115	0.365	6.74	3.14	34.9	224	50	14	153	No	No	Yes	Yes	37	148	98	777	37	cesarean section	twin pregnancy	No	No	Yes	No	3050	2900	YY	No	No	No	No
26Year	2	0		having work	Spontaneous	Dichorionic	36	18	No	Diet	No	No	Junior college	158	78.5	24.2	3.69	173	116	0.353	6.05	2	34.4	206	52	9	163	No	No	No	No					37	cesarean section	twin pregnancy	No	No	No	No	2650	2480	XX	No	No	One baby had admission to NICU	No
23Year	1	0		having work	Spontaneous	Dichorionic	36	14	No	Diet	No	No	Junior college	150	61	18.6					6.18	1.46	35.3	172	52	13	149	No	No	No	No					36	cesarean section	twin pregnancy	No	No	No	No	2090	2170	XX	No	No	Two babies had admission to NICU	No
35Year	3	1	11	no work	Spontaneous	Dichorionic	36	34	No	Diet	No	Yes	polytechnic school	163	91	21.4	3.75	159	117	0.349	7.16	1.52	34.6	192	53	11	174	No	No	No	No					36	cesarean section	twin pregnancy，Scarred uterus	No	No	Yes	No	2300	2310	XY	No	No	One baby had admission to NICU	No
27Year	2	1	3	having work	Spontaneous	Dichorionic	37	20	No	Diet	No	No	Undergraduate course	163	80	22.5	3.62	340	100	0.31	7.19	2.35	32.2	302	49	4	117	No	No	No	No					37	cesarean section	twin pregnancy	No	No	No	No	3000	2400	XX	No	No	No	No
31Year	2	0		having work	ART	Dichorionic	35	12.6	No	Diet	No	No	Junior college	170	66.8	18.6	4.05	182	128	0.385	8.27	4.36	34.4	248	55	10	181	Yes	No	No	No					35	cesarean section	Severe ICP	No	No	No	No	2660	2770	YY	No	No	One baby had admission to NICU	No
22Year	1	0		no work	Spontaneous	Monochorionic	36	21	No	Diet	No	No	Middle school	160	76	21.4	3.75	205	115	0.344	4.48	6.03	35.4	258	47	10	162	No	No	No	No					36	cesarean section	twin pregnancy	No	No	No	No	2670	2370	XX	No	No	No	No
28Year	3	0		having work	ART	Dichorionic	28	6	No	Diet	No	No	High school	160	60	21.3	3.75	344	118	0.356			29.6		51	8		Yes	No	No	No					29	cesarean section	twin pregnancy	No	No	No	No	1240	1240	XY	No	No	Two babies had admission to NICU	No
25Year	1	0		having work	Spontaneous	Monochorionic	36	25	No	Diet	No	Yes	Undergraduate course	158	70	17.6	3.59	265	111	0.342	7.5	3.11	31.8	232	53	14		No	No	No	No					36	cesarean section	twin pregnancy	No	No	No	No	1930	2270	XX	No	No	Two babies had admission to NICU	Two babies had
26Year	1	0		no work	ART	Dichorionic	34	20	No	Diet	No	No	Undergraduate course	160	70.1	19.5	3.12	265	97	0.31	9.06	3.1	32.7	225	50	9	145	Yes	No	No	No					34	cesarean section	cardiac insufficiency	No	No	Yes	No	2170	2150	XX	No	No	Two babies had admission to NICU	No
27Year	1	0		having work	Spontaneous	Monochorionic	35	13	No	Diet	No	No	Undergraduate course	158	78	26	3.35	294	103	0.316	7.34	2.71	31.4	241	47	18		Yes	No	No	No					36	cesarean section	twin pregnancy	No	No	No	No	2430	2320	YY	No	No	No	No
27Year	4	0		no work	ART	Dichorionic	34	28	No	Diet	No	Yes	polytechnic school	163	78	18.8	3.74	251	123	0.372	6.7	3.6	32.3	290	54	8	150	Yes	No	Yes	No					34	cesarean section	twin pregnancy	No	No	No	No	2370	2300	XY	No	No	One baby had admission to NICU	No
30Year	1	0		having work	ART	Dichorionic	37	20	No	Diet	No	No	Undergraduate course	166	68	17.2	3.07	226	106	0.328	6.73	3.5	32.6	243	46	11	147	No	No	No	No					37	cesarean section	twin pregnancy	Yes	No	No	No	2650	2900	XY	No	No	No	No
30Year	2	1	3	having work	Spontaneous	Dichorionic	36	18.3	No	Diet	No	No	Undergraduate course	162	64.6	17.6	3.27	135	108	0.327	7.9	2.19	34.7	205	46	8	130	No	No	No	No					37	cesarean section	twin pregnancy	No	No	No	No	3150	2800	YY	No	No	No	No
32Year	4	0		having work	ART	Dichorionic	37	12.1	No	Diet	No	Yes	polytechnic school	157	75	25.5	4.39	233	141	0.424	7.07	3.44	36.5	276	49	20	177	No	No	No	No					37	cesarean section	twin pregnancy	No	No	No	No	2450	2470	XY	No	No	Two babies had admission to NICU	No
26Year	1	0		having work	ART	Dichorionic	35	15	No	Diet	No	No	Junior college	156	65	20.5	3.55	216	119	0.351	5.17	2.21	37.5	206	48	23	131	Yes	No	No	No					35	cesarean section	twin pregnancy	No	No	No	No	2350	2170	XX	No	No	Two babies had admission to NICU	No
30Year	3	1	7	having work	Spontaneous	Monochorionic	33	20.6	No	Diet	No	No	polytechnic school	150	65.6	20	3.37	134	103	0.31	5.48	1.99	34.5	254	49	11	115	Yes	No	No	No					34	cesarean section	Selective fetal growth restriction	No	No	Yes	No	1820	930	XX	No	No	Two babies had admission to NICU	No
26Year	2	0		having work	Spontaneous	Dichorionic	35	13	No	Diet	No	No	Junior college	158	66	21.2	3.58	292	104	0.327	5.66	2.69	37.1	224	44	8	130	No	No	No	No					35	cesarean section	twin pregnancy	No	No	Yes	No	1980	2220	XX	No	No	Two babies had admission to NICU	No
30Year	1	0		no work	ART	Dichorionic	34	7	No	Diet	No	No	Undergraduate course	154	58	21.5	3.43	304	110	0.331	6.39	2.79	37.4	356	65	14	113	Yes	No	No	No					35	cesarean section	twin pregnancy	No	No	Yes	No	2300	1780	XX	No	No	Two babies had admission to NICU	No
29Year	1	0		having work	ART	Dichorionic	35	26	No	Diet	No	No	Undergraduate course	160	81	21.4	4.32	285	139	0.425	7.74	4.45	35.1	256	51	17	194	Yes	No	Yes	Yes	35	160	92	490	35	cesarean section	twin pregnancy，preeclampsia	No	No	No	No	2310	2380	XY	No	No	One baby had admission to NICU	No
24Year	1	0		having work	ART	Dichorionic	36	17.4	No	Diet	No	No	polytechnic school	163	67	18.4	3.56	203	123	0.362	6.75	2.78	36.9	287	67	13		No	No	No	No					37	cesarean section	twin pregnancy	No	No	No	No	2820	2240	XX	No	No	One baby had admission to NICU	One baby had
32Year	1	0		having work	Spontaneous	Dichorionic	34	21.5	No	Diet	No	No	Junior college	162	74	20	4.33	157	134	0.397	7.65	2.69	35.4	255	54	16	188	Yes	No	No	No					35	cesarean section	presentation of cord	No	No	No	No	2700	2350	XY	No	No	Two babies had admission to NICU	No
32Year	2	0		having work	ART	Dichorionic	34	18.2	No	Diet	No	Yes	Undergraduate course	158	62.2	17.6	3.8	181	119	0.361	7.48	2.52	32.3	209	43	14	160	Yes	No	Yes	Yes	34	147	88	844	36	cesarean section	twin pregnancy，preeclampsia	No	No	No	No	2580	1700	XX	No	No	One baby had admission to NICU	No
41Year	2	0		having work	ART	Monochorionic	34	18	No	Diet	No	Yes	Undergraduate course	167	78	21.5	3.4	145	124	0.37	7.61	2.17	35.1	241	47	46	227	Yes	No	Yes	Yes	34	159	87	403	34	cesarean section	twin pregnancy，preeclampsia	Yes	No	Yes	No	1930	1870	YY	No	No	Two babies had admission to NICU	No
25Year	1	0		no work	ART	Dichorionic	35	12	No	Diet	No	No	High school	155	56	18.3	3.49	198	114	0.345	8.03	2.3	34.9	276	49	12	202	No	No	No	No					35	cesarean section	twin pregnancy	No	No	Yes	No	2580	2210	XY	One baby had	No	One baby had admission to NICU	One baby had
30Year	1	0		having work	ART	Dichorionic	35	14	No	Diet	No	No	Undergraduate course	158	60	18.4	4.14	174	134	0.399	7.26	2.22	32.1	268	56	13	211	No	No	No	No					35	cesarean section	twin pregnancy	No	No	No	No	2470	1960	XY	No	No	Two babies had admission to NICU	No
34Year	1	0		having work	Spontaneous	Dichorionic	36	15.2	No	Diet	No	No	Junior college	151	66.2	22.3	3.72	138	117	0.338	6.42	3.01	33.7	222	45	14	164	No	No	No	No					36	cesarean section	twin pregnancy	No	No	No	No	2160	2000	YY	No	No	Two babies had admission to NICU	One baby had
28Year	1	0		having work	Spontaneous	Monochorionic	35	17.3	No	Diet	No	No	Undergraduate course	168	63.9	18.8	3.18	138	101	0.316	3.77	2.05	32.5	204	49	8	120	No	No	No	No					36	cesarean section	twin pregnancy	No	No	No	No	2780	2770	YY	No	No	No	No
25Year	2	0		no work	Spontaneous	Dichorionic	36	21	No	Diet	No	No	Junior college	161	73	19.9	3.73	248	113	0.359	8.94	2.87	36.1	170	51	13	139	No	No	Yes	Yes	37	151	91	2906	37	cesarean section	twin pregnancy	No	No	No	No	2550	2080	YY	No	No	Two babies had admission to NICU	No
32Year	2	1	5	having work	ART	Dichorionic	36	18.2	No	Diet	No	No	Junior college	158	65.2	18.8	3.71	246	109	0.336	6.21	3.38	32.7	307	54	5	166	No	No	No	No					37	cesarean section	twin pregnancy	No	No	Yes	No	3080	2530	YY	No	No	No	No
31Year	2	0		having work	ART	Dichorionic	36	15	No	Diet	No	No	Undergraduate course	161	64.5	19.5	3.45	239	107	0.336	6.1	3.47	35	236	47	9	112	Yes	No	No	No					36	cesarean section	twin pregnancy	No	No	No	No	2310	2700	XX	No	No	One baby had admission to NICU	No
34Year	3	1	4	having work	Spontaneous	Dichorionic	35	10.3	No	Diet	No	No	Junior college	162	60.3	19	3.13	225	92	0.285	6.7	2.67	31.2	294	54	5	150	Yes	No	No	No					35	cesarean section	twin pregnancy	No	No	No	No	2270	1940	XY	No	No	Two babies had admission to NICU	No
27Year	2	0		having work	Spontaneous	Monochorionic	32	16.5	No	Diet	No	No	Undergraduate course	160	67	18.5	3.8	253	128	0.383	7.34	2.23	37.3	280	61	20	162	Yes	Yes	No	No					35	cesarean section	Fetal growth restriction	No	No	No	No	2090	1460	YY	No	No	Two babies had admission to NICU	No
30Year	1	0		having work	ART	Dichorionic	34	20	No	Diet	No	No	Junior college	158	71	20	3.63	169	111	0.353	6.04	1.88	32.1	204	43	20	123	Yes	No	Yes	Yes	35	158	98	3882	35	cesarean section	severe preeclampsia	No	No	No	No	2235	2150	YY	One baby had	No	Two babies had admission to NICU	No
31Year	1	0		having work	ART	Dichorionic	35	25	No	Diet	No	No	Undergraduate course	162	75	19	4.27	270	139	0.419	6.33	2.83	33.8	307	59	12	158	Yes	Yes	No	No					36	cesarean section	twin pregnancy	Yes	No	No	No	2550	2220	XY	No	No	Two babies had admission to NICU	No
38Year	5	1	12	no work	Spontaneous	Dichorionic	34	21	No	Diet	No	Yes	High school	164	79	21.5					5.7	3.16	30.5	150	49	18	171	Yes	No	No	No					34	cesarean section	twin pregnancy，Scarred uterus	No	No	Yes	No	1720	1870	XX	No	No	Two babies had admission to NICU	No
36Year	3	0		having work	ART	Dichorionic	37	27	No	Diet	No	No	Junior college	170	95	23.5	4.19	209	126	0.382	6.54	3.3	34.7	300	45	13	134	No	No	Yes	No					37	cesarean section	twin pregnancy	Yes	No	Yes	No	2770	2560	XY	No	No	No	No
34Year	4	1	13	having work	ART	Dichorionic	37	24.3	No	Diet	No	No	Junior college	163	85.3	22.9	3.3	244	107	0.32	6.79	3.29	32.6	279	59	13	157	Yes	No	No	No					37	cesarean section	twin pregnancy，Scarred uterus	No	No	No	No	2850	2650	XX	No	No	Two babies had admission to NICU	No
26Year	2	0		having work	Spontaneous	Monochorionic	33	18	No	Diet	No	No	High school	158	60	16.8	3.44	252	114	0.352	8.12	3.94	38.1	250	50	12	135	Yes	No	No	No					33	cesarean section	twin pregnancy	No	No	Yes	No	2000	2200	YY	No	No	Two babies had admission to NICU	One baby had
32Year	3	0		having work	ART	Dichorionic	36	20	No	Diet	No	No	Undergraduate course	160	78	26.1	3.21	195	105	0.325	5.11	4.96	37.2	266	52	6	126	No	No	No	No					36	cesarean section	twin pregnancy	No	No	No	No	2530	2450	YY	No	No	No	No
27Year	1	0		having work	Spontaneous	Monochorionic	34	10.2	No	Diet	No	No	Undergraduate course	158	60.2	20	3.31	347	101	0.303	7.91	3.83	33.5	298	46	5	128	Yes	No	Yes	Yes	34	152	102	1015	34	cesarean section	twin pregnancy，preeclampsia	No	No	No	No	1850	1410	XX	No	No	Two babies had admission to NICU	No
33Year	2	0		having work	ART	Dichorionic	36	16	No	Diet	No	No	Undergraduate course	165	81	23.8	3.93	215	120	0.371	8.12	2.89	34.2	274	58	23	115	No	Yes	Yes	No					37	cesarean section	twin pregnancy	No	No	No	No	2650	2640	XX	No	No	Two babies had admission to NICU	No
26Year	1	0		having work	ART	Dichorionic	36	23.2	No	Diet	No	No	polytechnic school	163	74.7	19.3	3.54	174	110	0.342	8.67	2.36	34.8	184	46	18	149	No	No	No	No					37	cesarean section	twin pregnancy	No	No	No	No	2900	2900	YY	No	No	No	No
31Year	2	1	3	having work	Spontaneous	Dichorionic	37	20	No	Diet	No	No	postgraduate	163	77	21.6	3.69	187	118	0.354	7.17	2.14	35.1	174	46	12	136	No	No	No	No					37	cesarean section	twin pregnancy	No	No	No	No	2650	2410	XX	No	No	Two babies had admission to NICU	No
32Year	1	0		having work	ART	Dichorionic	35	16.3	No	Diet	No	No	Undergraduate course	158	67.1	20.3	3.84	247	108	0.34	7.26	4.11	36.6	249	50	19	155	Yes	Yes	Yes	Yes	35	154	92	442	36	cesarean section	twin pregnancy，preeclampsia	No	No	Yes	No	2640	2500	YY	No	No	One baby had admission to NICU	One baby had
29Year	2	1	9	having work	Spontaneous	Dichorionic	36	18.5	No	Diet	No	No	Undergraduate course	158	75	22.6	2.88	91	102	0.312	4.25	3.56	38.6	248	53	14	150	Yes	No	No	No					36	cesarean section	twin pregnancy，Scarred uterus	No	No	No	No	2720	2450	XY	No	No	No	No
32Year	1	0		having work	Spontaneous	Dichorionic	35	13	No	Diet	No	Yes	Undergraduate course	156	55	15.6	3.53	198	110	0.346	6.8	1.95	31.5	247	49	16	127	No	No	Yes	Yes	35	146	90	1963	36	cesarean section	twin pregnancy，preeclampsia	No	No	No	No	2330	2150	YY	No	No	One baby had admission to NICU	No
31Year	1	0		having work	ART	Dichorionic	36	23.5	No	Diet	No	No	Junior college	172	72.5	16.5	2.91	217	110	0.306	6.46	2.21	36.3	197	61	12	132	No	Yes	No	No					37	cesarean section	twin pregnancy	No	No	No	No	3200	2950	YY	No	No	Two babies had admission to NICU	No
25Year	2	0		no work	Spontaneous	Dichorionic	36	26.5	No	Diet	No	No	High school	168	83.5	20.1	3.6	246	111	0.338	6.19	1.97	33.9	193	47	17	134	No	No	Yes	Yes	36	143	94	394	36	cesarean section	twin pregnancy，Pregnancy induced hypertension	No	No	No	No	2880	2990	YY	No	No	No	No
30Year	3	0		having work	Spontaneous	Monochorionic	36	20	No	Diet	No	No	Undergraduate course	155	61.5	17.2	3.74	269	119	0.365	5.98	2.44	36.4	248	58	17	131	Yes	No	Yes	Yes	36	145	102	829	36	cesarean section	twin pregnancy，preeclampsia	No	No	No	No	2370	1860	XX	No	No	One baby had admission to NICU	No
29Year	1	0		having work	Spontaneous	Monochorionic	35	19	No	Diet	No	No	Undergraduate course	163	81	22.3	3.57	234	99	0.313	7.87	2.4	32.5	255	55	15	187	Yes	No	Yes	Yes	33	152	90	2850	35	cesarean section	twin pregnancy，preeclampsia	No	No	No	No	2420	1820	XX	No	No	Two babies had admission to NICU	No
32Year	2	1	4	having work	Spontaneous	Dichorionic	35	15	No	Diet	No	No	Undergraduate course	167	81.5	22.9	3.54	265	116	0.358	6.3	2.93	34.4	205	44	8	131	Yes	No	No	No					36	cesarean section	twin pregnancy	No	No	No	No	3100	2500	XX	No	No	No	No
32Year	1	0		having work	ART	Dichorionic	37	16.2	No	Diet	Bipolar Disorder	No	Doctor	170	81.2	21.4	3.6	191	118	0.357	9.12	2.9	36.6	179	57	14	142	No	No	No	No					37	cesarean section	twin pregnancy	No	No	No	No	2580	2500	XX	No	No	No	No
31Year	1	0		having work	Spontaneous	Dichorionic	37	13	No	Diet	No	No	Undergraduate course	160	73	23.4	3.67	184	110	0.34	5.32	3.69	35.5	235	50	13	152	No	No	No	No					37	cesarean section	twin pregnancy	No	No	No	No	2830	2450	XY	No	No	No	No
28Year	2	0		having work	Spontaneous	Monochorionic	37	17.7	No	Diet	No	Yes	Junior college	160	73.5	21.7	3.95	260	115	0.367	7.4	3.87	35.6	207	55	13	116	No	No	No	No					37	cesarean section	twin pregnancy	No	No	Yes	No	2720	2820	XX	No	No	No	No
31Year	1	0		having work	ART	Dichorionic	36	12.6	No	Diet	No	No	Undergraduate course	164	54.6	15.6	3.29	142	114	0.354	7.99	2.95	36	206	45	45	140	No	No	No	No					36	cesarean section	twin pregnancy	No	No	No	No	2800	2400	XX	No	No	No	No
32Year	2	0		having work	Spontaneous	Monochorionic	36	27	No	Diet	No	No	Undergraduate course	163	79	19.5	3.51	204	112	0.346	7.27	2.38	33.9	218	49	6	120	No	No	Yes	No					36	cesarean section	twin pregnancy	No	No	No	No	2450	2550	XX	No	No	Two babies had admission to NICU	No
35Year	2	0		no work	ART	Dichorionic	33	9.9	No	Diet	No	No	Undergraduate course	164	58.9	18.2	3.98	234	110	0.334	7.41	3.38	33	178	45	8	130	Yes	No	No	No					34	cesarean section	cardiac insufficiency	No	No	Yes	No	2470	2110	XX	One baby had	No	One baby had admission to NICU	No
30Year	4	0		no work	ART	Dichorionic	35	14	No	Diet	No	No	Undergraduate course	170	72	20	4.17	136	137	0.415	9.19	6.61	35.4	387	58	16		No	No	No	No					36	cesarean section	twin pregnancy	Yes	No	No	No	2500	2200	XY	No	No	Two babies had admission to NICU	Two babies had
28Year	1	0		no work	ART	Dichorionic	31	10	No	Diet	No	No	Undergraduate course	160	73.2	24.6	3.69	192	129	0.384	8.33	3.1	36.2	274	54	15	151	Yes	No	No	No					31	cesarean section	twin pregnancy	No	No	No	No	1530	1880	XY	No	No	Two babies had admission to NICU	No
34Year	3	0		no work	Spontaneous	Dichorionic	36	17.5	No	Diet	No	No	polytechnic school	165	78	21.9	3.78	228	129	0.365	6.96	3.62	35.8	217	55	10	152	No	No	No	No					36	cesarean section	twin pregnancy	No	No	No	No	2780	2260	XX	No	No	One baby had admission to NICU	No
35Year	2	0		having work	ART	Dichorionic	37	16	No	Diet	Antiphospholipid antibody syndrome	No	Junior college	165	63	17.2	3.89	241	122	0.376	7.7	2.38	35	256	51	11	133	Yes	No	No	No					37	cesarean section	twin pregnancy	No	No	No	No	2750	2700	YY	No	No	No	No
35Year	1	0		having work	ART	Dichorionic	37	16.8	No	Diet	No	No	Undergraduate course	155	62.8	18.7	3.53	234	117	0.35	7.06	2.63	33.3	345	54	13	134	No	No	No	No					37	cesarean section	twin pregnancy	No	No	No	No	2830	2950	YY	No	No	One baby had admission to NICU	No
31Year	3	0		having work	ART	Dichorionic	36	11.7	No	Diet	Antiphospholipid antibody syndrome	No	Undergraduate course	163	58.7	17.6	3.69	245	124	0.355	7.84	2.54	33.9	198	61	9	141	Yes	Yes	No	No					36	cesarean section	twin pregnancy，Scarred uterus	No	No	No	No	2200	2850	YY	No	No	One baby had admission to NICU	No
35Year	1	0		no work	ART	Dichorionic	35	14	No	Diet	hyperthyroidism	No	Middle school	156	72	24	3.42	108	103	0.322	5.03	3.16	31.8	262	48	10	195	Yes	No	No	No					37	cesarean section	twin pregnancy	No	No	No	No	2840	2080	XY	No	No	One baby had admission to NICU	No
28Year	1	0		no work	Spontaneous	Monochorionic	37	24	No	Diet	No	No	Master	163	78	20.3	3.39	183	113	0.352	6.59	1.28	37.9	301	50	50	151	No	No	No	No					37	cesarean section	twin pregnancy	No	No	No	No	2850	2700	XX	One baby had	No	One baby had admission to NICU	No
29Year	1	0		having work	ART	Dichorionic	32	8.1	No	Diet	No	No	Junior college	168	59	18	3.99	261	118	0.372	7.68	2.31	37	276	58	18	159	Yes	Yes	No	No					33	cesarean section	twin pregnancy，Severe ICP	No	No	Yes	No	2330	1730	XX	No	No	Two babies had admission to NICU	No
28Year	1	0		having work	Spontaneous	Monochorionic	33	12	No	Diet	No	No	Master	161	61	18.9	3.32	332	98	0.303	10.13	2.23	32.5	138	45	11	120	Yes	No	No	No					33	cesarean section	twin pregnancy	No	No	No	No	1750	1990	XX	No	No	Two babies had admission to NICU	No
34Year	3	0		no work	Spontaneous	Dichorionic	34	15	No	Diet	No	No	Undergraduate course	161	67	20	3.72	180	113	0.34	6.24	2.19	37.4	351	55	14	137	Yes	No	No	No					34	cesarean section	twin pregnancy	No	No	No	No	2490	2000	YY	No	No	One baby had admission to NICU	No
26Year	1	0		having work	Spontaneous	Dichorionic	37	18	No	Diet	No	No	Junior college	158	67	19.2	3.5	271	111	0.341	7.07	3.05	35.9	197	49	32	147	No	No	No	No					37	cesarean section	twin pregnancy	No	No	No	No	2600	2720	XY	No	No	Two babies had admission to NICU	No
33Year	2	1	11	having work	ART	Dichorionic	35	17.7	No	Diet	No	No	polytechnic school	168	77.7	21.2	3.87	234	118	0.372	6.73	3.65	31.5	352	53	6	153	Yes	No	No	No					35	cesarean section	twin pregnancy	No	No	No	No	2870	2830	YY	No	No	No	No
31Year	2	0		having work	ART	Dichorionic	36	17.1	No	Diet	No	Yes	Junior college	162	71	20.6	4.2	229	124	0.381	7.95	3.09	36.2	318	60	14	161	No	No	No	No					37	cesarean section	twin pregnancy	No	No	No	No	2510	2520	XY	No	No	One baby had admission to NICU	No
29Year	1	0		having work	Spontaneous	Dichorionic	37	22.5	No	Diet	No	Yes	Undergraduate course	166	74	18.6	3.62	355	109	0.332	4.85	1.62	35	227	48	12	139	No	No	No	No					37	cesarean section	twin pregnancy	No	No	No	No	2420	2970	XX	No	No	No	No
32Year	2	0		having work	ART	Dichorionic	37	19	No	Diet	No	No	Undergraduate course	164	73	20	3.13	152	101	0.318	6.67	1.86	34.6	237	51	18	166	No	Yes	No	No					37	cesarean section	twin pregnancy	No	No	No	No	2700	2600	XX	No	No	One baby had admission to NICU	No
32Year	2	0		having work	Spontaneous	Monochorionic	36	19	No	Diet	No	Yes	Undergraduate course	160	82	23.4	3.41	129	113	0.344	6.05	4.42	36.5	347	54	16	141	Yes	No	No	No					36	cesarean section	twin pregnancy	No	No	No	No	2950	3150	YY	No	No	No	No
32Year	1	0		no work	ART	Dichorionic	37	9.8	No	Diet	No	No	Junior college	152	71.8	26.8	3.15	328	97	0.303	5.02	2.37	31.4	216	50	8	148	No	No	No	No					37	cesarean section	twin pregnancy	No	No	Yes	No	2700	2500	YY	No	No	One baby had admission to NICU	No
24Year	1	0		having work	ART	Dichorionic	36	14.3	No	Diet	No	No	Middle school	157.5	54.3	15.5	3.86	206	119	0.375	7.04	1.65	31.9	201	51	29	139	No	No	No	No					36	cesarean section	twin pregnancy	No	No	No	No	2450	2800	XX	No	No	Two babies had admission to NICU	No
30Year	1	0		having work	ART	Dichorionic	37	14.7	No	Diet	No	No	Undergraduate course	157	64.7	20.7	3.77	173	124	0.383	8.5	4.18	34.5	211	52	9	147	No	No	No	No					37	cesarean section	twin pregnancy	No	No	No	No	2770	2500	XY	No	No	No	No
34Year	4	1	6	no work	ART	Dichorionic	37	19	No	Diet	No	No	Undergraduate course	162	79	22.8	4.1	162	124	0.379	7.26	4.41	31.3	239	57	16	161	No	Yes	No	No					37	cesarean section	twin pregnancy	No	No	No	No	2870	2540	YY	No	No	No	No
36Year	2	1	2	no work	ART	Dichorionic	36	16.3	No	Diet	No	No	polytechnic school	153	62.3	19.6	3.61	198	115	0.358	5.84	2.93	32.6	214	53	14	157	No	No	No	No					37	cesarean section	twin pregnancy	No	No	No	No	2730	2170	XY	No	No	One baby had admission to NICU	No
35Year	3	1	5	having work	Spontaneous	Dichorionic	36	19	No	Diet	No	No	Undergraduate course	155	72	22	3.82	212	121	0.376	8.55	2.38	34.1	204	45	8	114	No	No	No	No					37	cesarean section	twin pregnancy	No	No	No	No	2400	2650	XX	No	No	No	No
33Year	1	0		having work	ART	Dichorionic	35	11.8	No	Diet	No	No	Undergraduate course	165	78.8	24.6	4.02	211	113	0.362	5.74	3.54	33.8	265	65	8	166	No	Yes	Yes	No					35	cesarean section	twin pregnancy	No	No	No	No	2150	1870	XX	No	No	Two babies had admission to NICU	No
32Year	1	0		having work	ART	Dichorionic	37	14	No	Diet	No	Yes	Master	168	75	21.3	3.51	212	106	0.324	7.08	2.19	33.1	215	57	7	121	No	No	No	No					37	cesarean section	twin pregnancy	No	No	No	No	2450	2900	XX	No	No	No	No
26Year	1	0		no work	Spontaneous	Dichorionic	35	16.6	No	Diet	No	No	Junior college	163	76.6	22.5	4.05	263	114	0.363	6.8	6.41	36.4	312	48	5		No	No	No	No					35	cesarean section	twin pregnancy	No	No	No	No	2380	2540	XX	No	No	No	No
33Year	2	1	5	having work	Spontaneous	Dichorionic	37	21.3	No	Diet	No	No	Undergraduate course	165	71.1	21.3	3.2	174	97	0.299	5.93	2.02	33.6	158	54	8	196	No	No	No	No					37	cesarean section	twin pregnancy	Yes	No	Yes	No	2480	3250	XY	No	No	No	No
34Year	1	0		having work	ART	Dichorionic	36	23	No	Diet	No	Yes	Undergraduate course	171	80	21.2	2.83	143	96	0.29	5.8	5.58	32.9	214	48	9	154	No	No	No	No					36	cesarean section	twin pregnancy	No	No	No	No	3050	3140	YY	No	No	No	No
34Year	3	2	6	no work	Spontaneous	Monochorionic	35	22	No	Diet	No	No	Middle school	160	74.4	18.7	3.92	229	128	0.386	8.92	2.93	31.7	301	49	15	182	No	No	Yes	Yes	33	146	101	350	35	cesarean section	twin pregnancy	No	No	Yes	No	2000	2280	YY	No	No	Two babies had admission to NICU	No
27Year	2	0		having work	Spontaneous	Monochorionic	35	25.3	No	Diet	No	No	Junior college	160	69.3	17.1	4.25	238	130	0.399	7.16	3.39	30.6	315	57	15	175	No	No	Yes	Yes	35	170	110	1005	35	cesarean section	twin pregnancy	Yes	No	No	No	2500	2180	XX	No	No	Two babies had admission to NICU	No
31Year	3	1	4	having work	Spontaneous	Dichorionic	37	14.5	No	Diet	No	No	Undergraduate course	165	82.8	25	3.28	231	105	0.324	7.86	3.96	34.7	132	44	8	141	No	No	No	No					37	cesarean section	twin pregnancy	No	No	No	No	3080	2990	YY	No	No	Two babies had admission to NICU	No
32Year	2	1	5	no work	Spontaneous	Dichorionic	36	19.5	No	Diet	No	No	Undergraduate course	167	67	17	3.48	187	98	0.301	9.09	2.56	32.6	264	57	5		No	No	No	No					36	vaginal delivery		No	No	No	No	2520	2530	XY	No	No	No	No
23Year	1	0		having work	Spontaneous	Monochorionic	36	20	No	Diet	No	No	Junior college	155	71	21.2	3.04	186	105	0.319	7.87	3.14	34.3	239	43	7	167	No	No	No	No					36	cesarean section	twin pregnancy	No	No	No	No	2650	2900	YY	No	No	Two babies had admission to NICU	No
31Year	2	0		no work	ART	Dichorionic	36	15.2	No	Diet	No	No	Undergraduate course	154	61.3	19.3	4.25	182	137	0.412	6.32	2.17	33.8	222	51	11	192	No	Yes	No	No					36	cesarean section	twin pregnancy	No	No	No	No	2630	2170	YY	No	No	One baby had admission to NICU	No
28Year	1	0		having work	ART	Dichorionic	34	14	No	Diet	No	Yes	Undergraduate course	162	78	24.3	4	221	122	0.372	6.8	2.8	34.1	213	58	13	154	Yes	Yes	Yes	Yes	28	156	87	372	34	cesarean section	twin pregnancy	No	No	No	No	2340	2400	XY	No	No	Two babies had admission to NICU	No
31Year	1	0		having work	ART	Dichorionic	35	15	No	Diet	No	No	Undergraduate course	158	71	22.4	4.04	246	129	0.38	6.59	2.21	35.5	237	53	15	186	No	Yes	No	No					36	cesarean section	twin pregnancy	No	No	No	No	2480	2260	XY	No	No	Two babies had admission to NICU	No
37Year	2	0		having work	ART	Dichorionic	37	17	No	Diet	No	No	High school	165	79.5	23.8	3.67	291	96	0.315	6.99	2.55	32.4	182	50	14	182	No	No	No	No					37	cesarean section	twin pregnancy	No	No	No	No	3100	2400	XY	No	No	No	No
30Year	2	0		having work	ART	Dichorionic	37	19.1	No	Diet	No	No	Undergraduate course	163	70	19.9	3.88	180	127	0.397	7.31	3.5	37.7	230	53	15	150	No	Yes	No	No					37	cesarean section	twin pregnancy	No	No	No	No	2340	2340	XY	No	No	One baby had admission to NICU	No
31Year	2	0		having work	Spontaneous	Dichorionic	37	18	No	Diet	No	No	Undergraduate course	164	88	26	3.95	334	113	0.353	7.62	6.57	33.5	341	55	7		No	Yes	Yes	No					37	cesarean section	twin pregnancy	No	No	No	No	3490	2850	XY	No	No	One baby had admission to NICU	No
32Year	3	0		having work	ART	Dichorionic	30	7	No	Diet	No	No	Undergraduate course	155	67	24.9	4.21	271	131	0.404	6.74	4.01	31.4	258	56	10	205	Yes	No	No	No					30	cesarean section	twin pregnancy	No	No	No	No	1630	1420	XY	One baby had	No	Two babies had admission to NICU	No
28Year	1	0		having work	ART	Dichorionic	37	17	No	Diet	No	No	Junior college	168	67	17.7	3.5	248	112	0.35	8.82	3.14	34.4	188	46	11	164	No	No	No	No					37	cesarean section	twin pregnancy	No	No	No	No	2550	2680	XX	No	No	No	No
29Year	1	0		having work	Spontaneous	Dichorionic	37	14.5	No	Diet	No	No	Junior college	162	67.5	20.1	3.47	229	112	0.345	6.15	2.88	37.8	184	57	18	154	No	No	No	No					37	cesarean section	twin pregnancy	No	No	No	No	2800	2000	XY	No	No	One baby had admission to NICU	No
30Year	1	0		having work	Spontaneous	Dichorionic	35	21.5	No	Diet	No	No	Undergraduate course	163	81.5	22.5	3.67	242	120	0.361	6.88	2.33	34.7	260	48	14	174	No	No	Yes	No					36	cesarean section	twin pregnancy	No	No	No	No	2450	2650	XY	No	No	One baby had admission to NICU	No
32Year	1	0		having work	ART	Dichorionic	32	10	No	Diet	No	No	Undergraduate course	159	73	24.9	3.95	230	131	0.392	6.76	2.62	34.8	288	51	9	154	Yes	No	No	No					36	cesarean section	twin pregnancy	No	No	No	No	2750	2770	XY	One baby had	No	Two babies had admission to NICU	No
38Year	1	0		having work	ART	Dichorionic	36	17	No	Diet	No	No	Undergraduate course	160	67	19.5	3.68	223	123	0.372	7.56	3.11	34.5	290	53	12	156	Yes	No	No	No					37	cesarean section	twin pregnancy	No	No	No	No	3000	2580	YY	No	No	No	No
28Year	2	0		having work	Spontaneous	Dichorionic	36	20	No	Diet	No	No	Undergraduate course	167	84	22.9	3.85	166	118	0.373	7.56	1.94	35.2	236	58	18	177	No	No	No	No					36	cesarean section	twin pregnancy	No	No	No	No	2480	2480	YY	No	No	No	No
34Year	1	0		no work	ART	Dichorionic	37	17	No	Diet	No	No	Undergraduate course	164	63	17.1	3.51	203	112	0.341	6.72	1.96	35.2	240	55	19	190	No	No	No	No					37	cesarean section	twin pregnancy	No	No	No	No	2750	2750	XY	No	No	No	No
30Year	1	0		having work	ART	Dichorionic	34	16.7	No	Diet	No	No	Undergraduate course	163	65.7	18.4	3.57	172	113	0.338	8.66	2.03	33.2	188	42	13	184	Yes	No	No	No					34	cesarean section	twin pregnancy	No	No	No	No	2500	2720	XY	No	No	No	No
28Year	2	0		having work	ART	Dichorionic	36	23	No	Diet	No	No	Undergraduate course	163	83	22.5	3.34	212	108	0.318	7.61	2.42	33.9	208	48	21	183	No	No	Yes	Yes	36	158	97	3512	36	cesarean section	preeclampsia	No	No	No	No	2550	2400	XX	No	No	No	No
29Year	3	0		having work	ART	Dichorionic	37	11.5	No	Diet	No	No	High school	150	72	21.4	3.84	241	110	0.349	5.23	4.94	33.8	243	57	14	175	No	No	No	No					37	cesarean section	twin pregnancy	No	No	No	No	2500	2550	XX	No	No	No	No
24Year	1	0		no work	Spontaneous	Monochorionic	36	19	No	Diet	No	Yes	Junior college	158	67	19.2	3.45	229	108	0.334	6.92	2.05	37.6	238	65	10	140	No	No	No	No					36	cesarean section	twin pregnancy	No	No	No	No	2610	2750	XX	No	No	Two babies had admission to NICU	No
27Year	1	0		having work	ART	Dichorionic	32	14.5	No	Diet	No	No	Undergraduate course	155	70	23.1	3.94	202	133	0.406	8.22	2.71	34.5	226	43	10	174	Yes	No	No	No					36	cesarean section	twin pregnancy	No	No	No	No	2325	2180	XX	No	No	One baby had admission to NICU	No
29Year	2	1	1	no work	Spontaneous	Monochorionic	30	8	No	Diet	No	No	High school	155	48	16.6	3.54	199	113	0.35	6.25	3.05	31.4	232	52	7	129	Yes	No	No	No					30	cesarean section	twin pregnancy	No	No	No	No	1260	1090	XX	No	No	Two babies had admission to NICU	No
30Year	1	0		having work	Spontaneous	Monochorionic	35	20.3	No	Diet	No	No	Undergraduate course	168	77	20.8	3.49	181	114	0.349	7.47	1.57	34.8	297	53	23	161	No	No	No	No					35	cesarean section	twin pregnancy	No	No	No	No	2700	2030	YY	No	No	Two babies had admission to NICU	No
31Year	1	0		having work	Spontaneous	Dichorionic	36	16.3	No	Diet	No	No	Junior college	162	69.1	20.1	4.19	191	124	0.388	8.53	2.91	37.9	365	56	20	128	Yes	No	No	No					36	cesarean section	twin pregnancy	No	No	No	No	1760	2500	XX	No	No	One baby had admission to NICU	One baby had
28Year	1	0		having work	Spontaneous	Dichorionic	36	26.5	No	Diet	No	No	Undergraduate course	160	75	18.9	3.89	221	131	0.4	7.82	2.33	37	305	50	14	138	No	No	No	No					36	cesarean section	twin pregnancy	No	No	No	No	2820	2530	YY	No	No	No	No
23Year	1	0		having work	Spontaneous	Monochorionic	36	18	No	Diet	No	No	Junior college	152	55	16	3.57	295	118	0.359	7.71	2.02	33.7	293	46	8	153	Yes	No	No	No					36	cesarean section	twin pregnancy	No	No	No	No	2600	2470	XX	No	No	No	No
29Year	1	0		having work	ART	Dichorionic	36	24	No	Diet	No	No	Middle school	155	77	22	3.63	251	120	0.359	8.01	3.88	32.7	192	55	10	145	No	No	Yes	Yes	37	144	90	1919	37	cesarean section	twin pregnancy	No	No	No	No	2470	2190	XX	No	No	One baby had admission to NICU	One baby had
32Year	1	0		no work	ART	Dichorionic	33	22	No	Diet	No	No	Junior college	162	77	20.9	3.55	285	81	0.269	8.09	2.88	32.3	255	48	7	168	Yes	No	Yes	Yes	31	154	99	1815	33	cesarean section	severe preeclampsia	Yes	Yes	No	No	2350	2000	XY	No	No	Two babies had admission to NICU	Two babies had
29Year	2	0		having work	ART	Dichorionic	35	12.5	No	Diet	No	No	Undergraduate course	163	62	18.6	3.63	196	116	0.348	7.54	2.23	33.1	284	46	30	134	No	No	No	No					35	cesarean section	twin pregnancy	No	No	No	No	2410	2530	YY	No	No	One baby had admission to NICU	No
23Year	1	0		no work	Spontaneous	Monochorionic	37	11.6	No	Diet	No	No	Junior college	160	64.6	16.7	3.2	176	94	0.306	6.39	2.36	34.2	192	58	9	157	No	No	No	No					37	cesarean section	twin pregnancy	No	No	No	No	2910	2100	XX	No	No	One baby had admission to NICU	No
23Year	3	0		having work	Spontaneous	Monochorionic	36	22	No	Diet	No	No	Junior college	170	80	20	3.47	174	110	0.329	7.36	1.92	34.3	226	55	15	145	No	No	No	No					36	cesarean section	twin pregnancy	No	No	No	No	2450	2460	YY	No	No	One baby had admission to NICU	No
30Year	2	0		having work	ART	Dichorionic	34	17	No	Diet	No	No	polytechnic school	158	67	20	3.75	349	114	0.354	6.84	3.78	34.3	331	51	18	169	Yes	No	No	No					34	cesarean section	twin pregnancy	No	No	No	No	1840	2140	XX	No	No	Two babies had admission to NICU	No
36Year	6	0		having work	ART	Dichorionic	32	14	No	Diet	No	Yes	Undergraduate course	160	68	21.1	3.97	190	126	0.391	6	4.49	31.5	265	52	19	155	Yes	Yes	Yes	Yes	32	158	94	547	33	cesarean section	severe preeclampsia	No	No	Yes	No	1690	1750	XY	Two babies had	No	Two babies had admission to NICU	No
26Year	1	0		having work	ART	Dichorionic	37	21	No	Diet	No	No	Junior college	170	84	21.7	3.95	393	104	0.327	6.91	2.43	33.8	213	46	8	143	No	Yes	No	No					37	cesarean section	twin pregnancy	No	No	No	No	2660	2630	XY	No	No	No	No
31Year	2	1	4	having work	Spontaneous	Monochorionic	35	13.5	No	Diet	No	No	Undergraduate course	150	60.5	20	3.58	178	113	0.344	9.23	3.08	35.1	299	45	15	143	No	No	No	No					36	cesarean section	twin pregnancy，Scarred uterus	No	No	Yes	No	2420	2450	XX	No	No	No	No
38Year	4	1	13	having work	Spontaneous	Dichorionic	34	13	No	Diet	No	Yes	Undergraduate course	157	59	18.6	3.4	150	119	0.357	7.88	3.01	32.9	298	54	40	165	Yes	No	No	No					34	cesarean section	twin pregnancy，Scarred uterus	No	No	No	No	1900	2690	XX	No	No	Two babies had admission to NICU	Two babies had
28Year	3	0		having work	ART	Dichorionic	36	18.5	No	Diet	No	No	High school	165	69.5	18.7	3.86	133	122	0.378	9.09	1.98	33.3	272	55	19	161	No	Yes	No	No					37	cesarean section	twin pregnancy	No	No	No	No	2560	2700	XY	No	No	No	No
32Year	3	0		having work	Spontaneous	Monochorionic	36	14.6	No	Diet	No	No	Junior college	164	74	22	3.66	281	108		8.36	2.69	35.8	236	56	25	157	No	No	No	No					36	cesarean section	twin pregnancy	No	No	No	No	2660	2180	XX	No	No	Two babies had admission to NICU	No
28Year	1	0		having work	Spontaneous	Monochorionic	35	20	No	Diet	No	Yes	Undergraduate course	153	63	18.3	3.83	175	106	0.333	6.55	3.25	36	250	48	18	148	No	No	No	No					35	cesarean section	twin pregnancy	No	No	No	No	2050	1740	XX	No	No	Two babies had admission to NICU	No
28Year	1	0		having work	ART	Dichorionic	35	18.5	No	Diet	No	No	Junior college	165	74.5	20.6	3.17	171	102	0.317	8.06	1.67	34.8	130	52	26	157	Yes	No	No	No					36	cesarean section	twin pregnancy	No	No	No	No	2590	2810	YY	No	No	No	No
28Year	1	0		no work	Spontaneous	Monochorionic	34	15.1	No	Diet	No	No	polytechnic school	168	73.1	20.5	3.29	232	110	0.324	6.37	1.87	36.1	257	55	39	152	Yes	No	No	No					34	cesarean section	twin pregnancy	No	No	No	No	2000	2010	XX	No	No	Two babies had admission to NICU	Two babies had
27Year	3	0		having work	Spontaneous	Monochorionic	36	13.3	No	Diet	No	No	postgraduate	156	62.3	20.1	3.31	219	109	0.319	7.64	2.93	32.4	220	54	14	124	Yes	No	No	No					36	cesarean section	twin pregnancy	No	No	No	No	2230	2310	YY	No	No	Two babies had admission to NICU	No
30Year	3	1	3	having work	Spontaneous	Dichorionic	33	16.5	No	Diet	No	No	Undergraduate course	163	74.5	21.8	3.73	181	123	0.366	8.45	3.82	35.6	320	60	9	179	Yes	No	No	No					33	cesarean section	twin pregnancy	No	No	No	No	2060	2000	XX	No	No	Two babies had admission to NICU	No
39Year	2	1	12	having work	Spontaneous	Dichorionic	37	14	No	Diet	No	No	Undergraduate course	160	67	20.7	3.74	247	121	0.361	6.78	2.04	33.6	222	52	21	126	No	No	No	No					37	vaginal delivery		No	No	No	No	2710	2690	XY	No	No	No	No
29Year	2	0		having work	ART	Dichorionic	35	20	No	Diet	No	No	Undergraduate course	164	71.5	19.1	3.33	365	98	0.305	5.47	3.04	32.3	134	45	18	131	Yes	No	Yes	Yes	35	150	93	1594	35	cesarean section	preeclampsia，twin pregnancy	Yes	No	No	No	2720	2520	XY	No	No	No	No
34Year	1	0		no work	Spontaneous	Dichorionic	35	17	No	Diet	No	No	Undergraduate course	155	69	21.6	4.07	186	134	0.403	6.85	3.05	36.1	249	55	24	146	Yes	No	Yes	Yes	35	139	90	325	35	cesarean section	twin pregnancy	No	No	No	No	2550	2470	XY	No	No	One baby had admission to NICU	One baby had
27Year	1	0		having work	ART	Dichorionic	36	13.5	No	Diet	No	No	Junior college	165	65.5	19.1	3.67	250	119	0.353	8.29	2.56	36.5	280	59	9	132	No	No	No	No					36	cesarean section	twin pregnancy	No	No	No	No	2750	2360	XX	No	No	No	No
25Year	2	1	1	no work	Spontaneous	Monochorionic	36	16	No	Diet	No	No	High school	155	56	16.6	3.03	150	101	0.298	5.82	1.79	32.3	272	38	10	160	No	No	No	No					36	cesarean section	twin pregnancy	No	No	No	No	2250	2400	XX	No	No	Two babies had admission to NICU	No
31Year	1	0		having work	Spontaneous	Dichorionic	37	11.8	No	Diet	No	Yes	Undergraduate course	159	60.3	18.7	3.7	241	109	0.341	6.56	1.8	35.1	232	44	15	172	No	No	No	No					37	cesarean section	twin pregnancy	No	No	No	No	2580	2380	YY	No	No	No	No
29Year	1	0		having work	ART	Dichorionic	35	7.5	No	Diet	No	Yes	Undergraduate course	159	54.5	18.5	3.9	168	122	0.371	7.54	2.16	31.7	242	47	19	165	No	No	No	No					35	cesarean section	twin pregnancy	No	No	Yes	No	2360	2100	YY	No	No	Two babies had admission to NICU	No
31Year	4	0		having work	Spontaneous	Dichorionic	36	16	No	Diet	Antiphospholipid antibody syndrome	No	Master	165	74	21.3	3.23	135	104	0.314	5.48	1.62	36.3	251	44	40	144	No	Yes	No	No					37	cesarean section	twin pregnancy	No	No	No	No	2730	2900	YY	No	No	No	No
26Year	1	0		having work	ART	Dichorionic	36	29	No	Diet	No	No	Undergraduate course	167	89	21.5	4	226	127	0.386	8.19	3.04	33	298	54	14	181	No	Yes	Yes	Yes	36	159	109	3555	36	cesarean section	severe preeclampsia	No	No	No	No	2740	2940	XX	No	No	One baby had admission to NICU	No
29Year	1	0		having work	ART	Dichorionic	36	17.5	No	Diet	No	Yes	Master	160	64.8	24.4	3.91	159	116	0.358	4.99	3.53	31.7	219	46	16	129	No	No	No	No					36	vaginal delivery		No	No	No	No	2600	2660	XY	No	No	No	No
32Year	3	1	6	no work	Spontaneous	Monochorionic	34	20	No	Diet	No	Yes	Undergraduate course	160	80	23.4	4.06	220	126	0.381	6.33	3.25	32.7	284	51	9	168	Yes	No	No	No					34	cesarean section	twin pregnancy，Scarred uterus	No	No	Yes	No	2540	2460	YY	No	No	Two babies had admission to NICU	No
39Year	3	1	12	having work	Spontaneous	Monochorionic	36	9.8	No	Diet	No	No	Middle school	156	59.8	20.5	3.52	137	116	0.361	5.66	3.34	33.3	285	56	15	211	Yes	No	No	No					36	cesarean section	twin pregnancy	No	No	No	No	2050	2250	YY	No	No	Two babies had admission to NICU	One baby had
35Year	3	0		having work	Spontaneous	Monochorionic	34	16	No	Diet	No	No	Undergraduate course	158	76	24	3.27	242	106	0.318	6.8	2.83	32.1	245	52	12	163	No	Yes	No	No					34	cesarean section	twin pregnancy	No	No	No	No	1810	2000	XX	No	No	Two babies had admission to NICU	One baby had
28Year	1	0		having work	Spontaneous	Monochorionic	34	17	No	Diet	No	No	Undergraduate course	162	67	19	3.07	243	103	0.319	6.32	2.72	32.6	255	55	9	179	Yes	No	No	No					34	cesarean section	twin pregnancy	No	No	Yes	No	2100	1640	XX	No	No	Two babies had admission to NICU	No
33Year	1	0		having work	Spontaneous	Monochorionic	36	11	No	Diet	No	No	Undergraduate course	160	76	25.3	3.97	259	119	0.376	5.92	3.3	32.8	267	59	29	188	Yes	No	No	No					36	cesarean section	twin pregnancy	No	No	No	No	2190	1990	XX	No	No	Two babies had admission to NICU	No
30Year	1	0		having work	ART	Dichorionic	32	10.3	No	Diet	No	No	Undergraduate course	162	57	17.7	3.98	250	117	0.366	9	2.5	29.7	214	50	21	173	Yes	No	No	No					37	cesarean section	twin pregnancy	No	No	Yes	No	2750	3100	XX	No	No	No	No
28Year	1	0		having work	ART	Dichorionic	37	17	No	Diet	No	No	Middle school	155	61	18.3	4.23	184	129	0.393	6.66	2.35	33.4	201	47	11	161	No	Yes	No	No					38	cesarean section	twin pregnancy	No	No	No	No	2900	2500	YY	No	No	No	No
26Year	1	0		having work	Spontaneous	Dichorionic	37	11	No	Diet	No	No	Undergraduate course	168	76	23	3.27	168	109	0.333	6.56	9.51	36.3	365	52	5	132	No	No	No	No					37	cesarean section	twin pregnancy	No	No	No	No	2990	3050	YY	No	No	No	No
29Year	1	0		having work	ART	Dichorionic	35	21	No	Diet	No	No	High school	157	67	18.6	3.3	148	117	0.354	8.19	3.45	33.1	310	63	19	163	Yes	Yes	Yes	Yes	35	140	93	300	36	cesarean section	twin pregnancy，Severe ICP	Yes	Yes	No	No	2450	2680	XY	No	No	No	No
34Year	2	0		having work	ART	Dichorionic	37	13	No	Diet	No	Yes	Undergraduate course	170	94	28	3.86	236	131	0.383	6.68	2.27	31.3	266	61	14	157	No	No	Yes	Yes	37	140	100	584	37	cesarean section	twin pregnancy	No	No	No	No	2580	2500	XY	No	No	No	No
32Year	1	0		having work	ART	Dichorionic	36	7	No	Diet	No	Yes	Undergraduate course	162	67	25.5	3.84	183	126	0.37	6.37	5.34	31.8	295	52	9		No	No	No	No					36	cesarean section	twin pregnancy	No	No	No	No	2360	2090	XY	No	No	Two babies had admission to NICU	One baby had
31Year	3	0		having work	ART	Dichorionic	37	17.5	No	Diet	Antiphospholipid antibody syndrome	No	Undergraduate course	158	70	21	4.29	188	132	0.4	6.53	2.22	34.1	238	47	15	144	No	Yes	No	No					37	cesarean section	twin pregnancy	No	No	No	No	2570	2650	YY	No	No	One baby had admission to NICU	One baby had
34Year	3	0		having work	ART	Dichorionic	32	16.3	No	Diet	systemic sclerosis	Yes	Undergraduate course	161	62.3	17.7	3.87	226	121	0.363	8.89	3.84	29.5	506	72	26		Yes	Yes	Yes	Yes	32	159	98	4281	33	cesarean section	severe preeclampsia	No	No	No	No	1840	1560	XY	One baby had	No	Two babies had admission to NICU	One baby had
32Year	1	0		having work	ART	Dichorionic	30	11.7	No	Diet	No	No	Junior college	152	67	24.1	4.19	216	128	0.395	5.99	3.11	33.2	244	48	4	211	Yes	No	No	No					30	cesarean section	twin pregnancy	No	No	No	No	1330	1390	YY	No	No	Two babies had admission to NICU	No
33Year	1	0		having work	ART	Dichorionic	37	19	No	Diet	No	No	Undergraduate course	168	86.5	23.9	3.07	258	103	0.305	7.92	3.41	36.4	271	67	31	129	No	No	No	No					37	cesarean section	twin pregnancy	No	No	No	No	3420	3500	XX	No	No	One baby had admission to NICU	No
27Year	1	0		having work	ART	Dichorionic	38	14	No	Diet	No	Yes	Middle school	158	59	18	3.89	107	117	0.352	6.23	2.98	36.3	181	50	8	189	Yes	No	No	No					31	cesarean section	twin pregnancy	No	No	Yes	No	1810	1370	YY	No	No	Two babies had admission to NICU	One baby had
33Year	1	0		having work	ART	Dichorionic	36	10	No	Diet	No	No	postgraduate	163	60	18.8	3.33	215	112	0.335	6.69	2.73	34.1	261	46	10	134	No	No	No	No					36	cesarean section	twin pregnancy	No	No	No	No	2430	2140	XY	No	No	One baby had admission to NICU	One baby had
30Year	1	0		having work	ART	Dichorionic	37	11.9	No	Diet	No	No	postgraduate	165	66.6	20	3.61	160	110	0.346	6.93	3.6	34.1	300	43	17	158	Yes	No	No	No					37	cesarean section	twin pregnancy	No	No	No	No	3040	3000	XY	No	No	No	No
31Year	1	0		having work	Spontaneous	Monochorionic	36	13.7	No	Diet	No	No	Undergraduate course	164	68	20.4	3.05	232	101	0.3	7.21	2.85	35.3	289	48	11	126	No	No	No	No					36	cesarean section	twin pregnancy	No	No	No	No	2350	2600	YY	No	No	No	No
36Year	1	0		having work	ART	Dichorionic	37	18	No	Diet	No	No	postgraduate	155	69	21.2	3.92	218	122	0.37	6.4	3.34	35	264	45	17	149	No	No	No	No					37	cesarean section	twin pregnancy	No	No	No	No	2900	2650	XY	No	No	No	No
32Year	1	0		having work	Spontaneous	Dichorionic	31	11.5	No	Diet	No	No	postgraduate	155	56	18.5	3.28	199	108	0.332	8.49	2.75	33.9	332	52	17	149	Yes	No	No	No					32	cesarean section	intrauterine infection	No	No	Yes	No	1800	2230	YY	No	No	Two babies had admission to NICU	No
29Year	1	0		having work	Spontaneous	Dichorionic	38	15	No	Diet	No	Yes	Undergraduate course	164	83.3	23.7	3.47	202	103	0.315	6.42	2.88	33	323	59	8	181	No	No	No	No					38	cesarean section	twin pregnancy	Yes	No	No	No	3160	2450	YY	No	No	No	No
29Year	1	0		having work	ART	Dichorionic	34	16.5	No	Diet	No	Yes	Undergraduate course	154	67.5	21.5	3.43	192	107	0.327	5.93	2.34	32.9	318	58	13	170	Yes	No	No	No					34	cesarean section	twin pregnancy	No	No	No	No	2200	1950	XX	One baby had	No	Two babies had admission to NICU	No
27Year	2	0		having work	Spontaneous	Monochorionic	35	16.3	No	Diet	No	No	High school	150	68	22.3	3.88	135	112	0.353	6.65	4.58	31.1	327	48	8		Yes	No	No	No					35	cesarean section	twin pregnancy	No	No	No	No	2130	2020	XY	No	No	Two babies had admission to NICU	Two babies had
32Year	1	0		having work	ART	Dichorionic	36	16	No	Diet	No	No	Junior college	152	60	19	2.63	207	90	0.269	6.76	2.04	37.2	273	52	25	125	No	No	No	No					37	cesarean section	twin pregnancy	No	No	No	No	2130	2420	YY	No	No	One baby had admission to NICU	No
27Year	1	0		no work	ART	Dichorionic	36	19.5	No	Diet	No	No	Middle school	163	73.5	20.3	3.58	223	117	0.347	5.3	1.69	34.3	295	53	14	180	Yes	No	No	No					37	cesarean section	twin pregnancy	No	No	No	No	2370	2600	XY	No	No	One baby had admission to NICU	No
28Year	1	0		having work	ART	Dichorionic	37	15.7	No	Diet	No	Yes	Undergraduate course	164	73.8	21.6	3.23	242	110	0.321	5.97	2.15	35.6	260	48	9	133	No	No	No	No					37	cesarean section	twin pregnancy	No	No	No	No	2440	2520	XY	No	No	No	No
31Year	3	0		having work	ART	Dichorionic	36	15.7	No	Diet	No	No	Undergraduate course	160	65.7	19.5	3.85	249	127	0.38	7.8	4.17	38.4	274	53	12	152	No	Yes	No	No					37	cesarean section	twin pregnancy	No	No	No	No	2380	2650	XY	No	No	No	No
30Year	2	1	4	having work	Spontaneous	Monochorionic	36	22	No	Diet	No	Yes	Junior college	158	77	22.8	3.64	203	120	0.368	10.03	3.23	34.9	374	47	10	160	No	No	No	No					36	cesarean section	twin pregnancy，Scarred uterus	No	No	No	No	2620	2170	YY	No	No	One baby had admission to NICU	One baby had
33Year	1	0		having work	ART	Dichorionic	36	24.1	No	Diet	No	No	Undergraduate course	168	90.7	23.5	3.17	209	104	0.309	5.33	1.8	37.8	134	49	12	111	No	No	No	No					37	cesarean section	twin pregnancy	No	No	No	No	2670	2400	XX	No	No	No	No
30Year	1	0		having work	ART	Dichorionic	36	15.35	No	Diet	No	No	Undergraduate course	160	66	19.7	3.8	267	124	0.386	6.73	3.76	38.8	222	45	14	175	Yes	No	No	No					37	cesarean section	twin pregnancy	No	No	No	No	2340	2570	YY	No	No	No	No
34Year	1	0		having work	Spontaneous	Monochorionic	36	14.7	No	Diet	No	No	Undergraduate course	165	69	19.9	3.19	169	102	0.309	6.59	1.47	35	241	54	72	123	No	No	No	No					36	cesarean section	twin pregnancy	No	No	No	No	2450	2420	XX	No	No	No	No
23Year	2	0		having work	Spontaneous	Monochorionic	37	21.5	No	Diet	No	No	Undergraduate course	163	70	17.8	3.61	254	117	0.352	7.8	0.83	36.2	211	56	11	170	Yes	No	No	No					37	cesarean section	twin pregnancy	No	No	No	No	2230	1800	XX	No	No	Two babies had admission to NICU	No
29Year	1	0		having work	ART	Dichorionic	36	16.6	No	Diet	No	Yes	Undergraduate course	157	62.6	18.6	3.65	287	114	0.342	8.47	2.71	35.6	318	50	12	131	No	No	No	No					36	cesarean section	twin pregnancy	No	No	No	No	2320	2380	YY	No	No	One baby had admission to NICU	No
32Year	3	2	2	no work	Spontaneous	Dichorionic	35	16	No	Diet	No	No	Master	163	64	18.2	3.69	171	118	0.354	7.71	1.99	33.1	220	40	10	138	Yes	No	No	No					35	cesarean section	twin pregnancy	No	No	No	No	2220	2390	YY	No	No	Two babies had admission to NICU	No
34Year	3	1	8	no work	Spontaneous	Dichorionic	33	16.5	No	Diet	No	No	Junior college	158	71.5	22	3.59	221	124	0.369	5.22	2.64	30.8	225	56	12	151	Yes	No	No	No					33	cesarean section	twin pregnancy	No	No	No	No	2020	2200	XX	No	No	Two babies had admission to NICU	No
27Year	1	0		having work	ART	Dichorionic	36	17	No	Diet	No	Yes	Undergraduate course	164	71	20	3.49	175	116	0.338	7.7	2.13	35.2	198	51	10	159	Yes	No	No	No					37	cesarean section	twin pregnancy	No	No	No	No	2500	2550	XY	No	No	No	No
36Year	1	0		having work	ART	Dichorionic	36	14	No	Diet	Antiphospholipid antibody syndrome	No	Undergraduate course	164	69	20.4	3.65	232	127	0.373	6.26	4.25	35.5	191	47	11	151	No	Yes	No	No					37	cesarean section	twin pregnancy	No	No	No	No	2550	2120	XY	No	No	One baby had admission to NICU	No
27Year	3	0		having work	ART	Dichorionic	37	17	No	Diet	No	No	Junior college	170	75	20	3.7	183	121	0.357	6.23	3.86	33.1	268	45	11	154	No	No	No	No					37	cesarean section	twin pregnancy	No	No	No	No	2800	2480	XY	No	No	No	No
32Year	1	0		having work	Spontaneous	Dichorionic	37	13.6	No	Diet	No	No	postgraduate	158	66.6	21.2	3.49	241	111	0.335	8.14	4.39	35	248	45	16	142	No	No	No	No					37	cesarean section	twin pregnancy	No	No	No	No	2350	2500	XX	No	No	No	No
27Year	2	0		no work	Spontaneous	Dichorionic	37	18	No	Diet	No	No	Junior college	157	62.5	18	3.1	236	98	0.288	6.25	3.7	40	262	57	9	146	No	No	No	No					37	cesarean section	twin pregnancy	No	No	No	No	3030	2190	YY	No	No	One baby had admission to NICU	One baby had
39Year	4	1	14	having work	ART	Dichorionic	36	19	No	Diet	No	No	polytechnic school	154	81	26.1	3.57	268	120	0.366	5.97	2.81	34.8	231	56	10	146	Yes	No	No	No					36	cesarean section	twin pregnancy，Scarred uterus	No	No	No	No	2880	2680	XY	No	No	One baby had admission to NICU	No
27Year	1	0		having work	Spontaneous	Dichorionic	30	11.5	No	Diet	No	No	Undergraduate course	165	58.5	17.2	3.69	156	128	0.374	5.34	3.28	35.3	240	53	14	169	Yes	No	No	No					30	cesarean section	twin pregnancy	No	No	No	No	1495	1450	YY	No	No	Two babies had admission to NICU	Two babies had
31Year	2	0		having work	ART	Dichorionic	32	14.1	No	Diet	No	Yes	Undergraduate course	157	59.6	18.2	3.67	225	120	0.359	6.94	2.38	33.8	260	57	13	170	No	No	No	No					32	cesarean section	Fetal distress	No	No	Yes	Yes	1650		XX	No	No	One baby had admission to NICU	No
32Year	1	0		no work	Spontaneous	Monochorionic	35	18	No	Diet	No	No	Junior college	169	65	22.7	3.95	373	125	0.382	7.29	3.78	37.1	240	59	15	150	No	Yes	Yes	Yes	36	151	93	330	36	cesarean section	twin pregnancy	No	No	No	No	2190	2100	XX	No	No	Two babies had admission to NICU	Two babies had
31Year	1	0		no work	ART	Dichorionic	34	15.5	No	Diet	No	No	Undergraduate course	162	62	17.7	3.64	145	107	0.327	6.88	1.42	32.7	186	52	6	145	Yes	No	No	No					34	cesarean section	twin pregnancy	No	No	No	No	2270	1930	XX	No	No	Two babies had admission to NICU	One baby had
41Year	4	1	15	having work	Spontaneous	Dichorionic	35	21	No	Diet	No	No	Undergraduate course	165	79	22.6	3.56	256	123	0.358	8.09	2.89	34.2	325	55	28	149	Yes	No	No	No					36	cesarean section	twin pregnancy，Scarred uterus	No	No	No	No	2920	2440	XX	No	No	No	No
34Year	1	0		having work	ART	Dichorionic	36	13.9	No	Diet	No	Yes	Undergraduate course	163	60	17.3	3.07	188	103	0.314	7.04	1.78	32.6	329	73	13	156	Yes	No	No	No					36	cesarean section	twin pregnancy	No	No	No	No	2570	2280	XY	No	No	One baby had admission to NICU	One baby had
39Year	6	1	17	having work	Spontaneous	Dichorionic	30	10	No	Diet	No	No	Junior college	153	65	21.4	3.69	189	125	0.371	8.16	4.64	34	295	58	15	147	Yes	No	No	No					30	cesarean section	twin pregnancy	No	No	No	No	1260	1490	YY	No	No	Two babies had admission to NICU	No
30Year	1	0		having work	Spontaneous	Monochorionic	36	11	No	Diet	No	No	Undergraduate course	155	65	22.4	3.96	128	129	0.381	6.38	4.23	38	214	48	14	153	No	No	No	No					36	cesarean section	twin pregnancy	No	No	No	No	2160	2500	YY	No	No	One baby had admission to NICU	No
32Year	2	0		having work	ART	Dichorionic	35	9	No	Diet	No	No	Undergraduate course	162	56	17.9	3.9	164	120	0.362	6.51	2.62	33.3	232	51	14	199	Yes	No	No	No					35	cesarean section	Severe ICP	No	No	No	No	2340	2330	XY	No	No	Two babies had admission to NICU	No
28Year	2	1	3	having work	Spontaneous	Monochorionic	35	16.6	No	Diet	No	No	Undergraduate course	160	62.6	17.9	3.84	281	128	0.376	6.56	2.31	37.1	250	59	23	148	Yes	No	No	No					35	cesarean section	twin pregnancy，Scarred uterus	No	No	No	No	2350	2250	XX	No	No	Two babies had admission to NICU	Two babies had
31Year	2	1	6	no work	Spontaneous	Dichorionic	37	12.1	No	Diet	No	Yes	High school	165	75	23.3	3.69	273	112	0.342	4.52	2.45	33.4	240	43	18	151	No	No	No	No					37	cesarean section	twin pregnancy	No	No	No	No	2470	2950	XY	No	No	No	No
36Year	3	0		having work	Spontaneous	Dichorionic	34	19	No	Diet	No	No	Undergraduate course	159.5	73	23.1	3.41	202	104	0.313	5.63	3.16	35.3	341	51	19	158	Yes	No	No	No					34	cesarean section	twin pregnancy	No	No	No	No	2120	2170	XY	No	No	Two babies had admission to NICU	No
28Year	1	0		having work	Spontaneous	Dichorionic	37	18	No	Diet	No	Yes	Undergraduate course	156	70	21.3	3.54	185	117	0.339	6.79	2.36	34.5	210	56	15	181	No	No	Yes	Yes	37	179	92	3909	38	cesarean section	twin pregnancy	No	No	Yes	No	2520	2990	XY	No	No	No	No
26Year	1	0		having work	Spontaneous	Dichorionic	36	18.5	No	Diet	No	No	Undergraduate course	163	86	25.4	3.21	232	105	0.313	6.84	3.95	36.6	285	65	14	152	No	No	No	No					36	cesarean section	twin pregnancy	No	No	No	No	2850	2800	YY	No	No	One baby had admission to NICU	No
35Year	2	1	10	having work	ART	Dichorionic	37	19	No	Diet	No	No	High school	152	64	19.4	3.77	257	126	0.378	6.53	2.14	36	204	53	12	170	No	No	No	No					37	cesarean section	twin pregnancy	No	No	No	No	2230	2600	YY	No	No	Two babies had admission to NICU	No
32Year	2	0		having work	ART	Dichorionic	37	6.5	No	Diet	No	No	Undergraduate course	159	59.5	20.9	3.21	148	97	0.289	7.35	2.48	32.9	275	44	6	127	No	No	No	No					37	cesarean section	twin pregnancy	No	No	No	No	2600	2400	XY	No	No	One baby had admission to NICU	No
36Year	1	0		having work	ART	Dichorionic	35	11	No	Diet	No	Yes	Undergraduate course	170	77	19.4	4	183	125	0.39	6.96	2.38	33.8	256	57	16	129	Yes	No	Yes	Yes	35	140	91	2824	35	cesarean section	severe preeclampsia	No	No	No	No	2150	2180	XX	No	No	Two babies had admission to NICU	Two babies had
29Year	2	0		having work	ART	Dichorionic	36	19.4	No	Diet	No	Yes	Middle school	162	75	21.1	3.86	279	122	0.363	5.98	2.84	33.6	289	56	14	181	No	No	No	No					37	cesarean section	twin pregnancy	No	No	No	No	2820	3180	XY	No	No	No	No
25Year	2	0		having work	Spontaneous	Dichorionic	36	15	No	Diet	No	No	Undergraduate course	158	57	16.8	3.13	167	106	0.321	8.01	3.15	32.5	321	54	11	144	Yes	No	No	No					37	cesarean section	twin pregnancy	No	No	No	No	2790	2970	XY	No	No	Two babies had admission to NICU	No
29Year	2	1	5	no work	Spontaneous	Monochorionic	35	17.5	No	Diet	No	No	Junior college	166	72.5	19.9	3.62	182	119	0.353	6.78	1.2	35.8	166	52	13	153	No	No	No	No					36	cesarean section	twin pregnancy	No	No	Yes	No	2130	2050	XX	No	No	Two babies had admission to NICU	One baby had
30Year	1	0		no work	Spontaneous	Monochorionic	36	20	No	Diet	No	No	Undergraduate course	158	80	24	3.65	251	117	0.357	6.7	1.57	32.3	265	49	16	145	Yes	No	Yes	No					36	cesarean section	twin pregnancy	No	No	No	No	2180	2250	XX	No	No	Two babies had admission to NICU	One baby had
24Year	2	0		having work	Spontaneous	Monochorionic	36	13.5	No	Diet	No	No	Undergraduate course	156	62.5	25.6	3.04	254	102	0.304	5.78	3.36	36.9	309	56	4	155	No	No	No	No					36	cesarean section	twin pregnancy	No	No	No	No	2350	2350	XX	No	No	No	No
27Year	1	0		having work	ART	Dichorionic	37	17.6	No	Diet	No	No	Undergraduate course	167	80.5	22.5	3.68	193	111	0.333	5.42	3.5	34.3	269	63	10	174	No	No	No	No					37	cesarean section	twin pregnancy	No	No	No	No	2310	2220	XX	No	No	One baby had admission to NICU	No
28Year	1	0		having work	ART	Dichorionic	32	17.5	No	Diet	No	No	Undergraduate course	160	65	18.5	3.43	262	107	0.329	6.46	2.49	32.4	256	58	7	150	Yes	No	Yes	No					32	cesarean section	twin pregnancy	No	No	No	No	1470	1820	XY	No	No	Two babies had admission to NICU	One baby had
34Year	1	0		having work	Spontaneous	Dichorionic	36	23	No	Diet	No	No	Undergraduate course	158	74	20.4	3.6	225	117	0.337	6.07	2.05	32.4	257	52	16	155	No	No	Yes	Yes	36	141	103	809	37	cesarean section	twin pregnancy	No	No	No	No	2680	1900	XY	No	No	Two babies had admission to NICU	No
32Year	1	0		having work	Spontaneous	Monochorionic	36	16.7	No	Diet	No	Yes	Junior college	156	71.7	22.6	3.38	120	112	0.335	5.12	6.01	34.8	345	49	17	145	No	No	No	No					36	cesarean section	twin pregnancy	No	No	No	No	2470	2500	YY	No	No	Two babies had admission to NICU	No
29Year	2	0		having work	ART	Dichorionic	36	15	No	Diet	No	No	High school	155	70	22.8	3.7	251	122	0.369	7.92	3.87	33.8	401	62	12	159	No	No	No	No					36	cesarean section	twin pregnancy	No	No	No	No	2280	2150	YY	No	No	Two babies had admission to NICU	No
30Year	1	0		having work	ART	Dichorionic	35	15	No	Diet	No	No	Junior college	163	65	18.8	3.57	195	99	0.317	6.49	2.69	33.5	214	50	6	119	Yes	No	No	No					36	cesarean section	twin pregnancy	No	No	No	No	2950	2580	XY	No	No	Two babies had admission to NICU	No
28Year	1	0		no work	Spontaneous	Dichorionic	37	16	No	Diet	No	No	Undergraduate course	166	74	21	3.61	189	113	0.341	5.08	2.67	32.8	277	54	12	163	No	No	No	No					37	cesarean section	twin pregnancy	No	No	No	No	2110	2350	XX	No	No	Two babies had admission to NICU	No
36Year	2	0		having work	ART	Dichorionic	37	19	No	Diet	No	No	High school	163	82	23.7	3.18	153	97	0.306	6.33	4.77	35.1	216	55	16	191	No	No	No	No					37	cesarean section	twin pregnancy	No	No	No	No	2550	2850	XY	No	No	One baby had admission to NICU	No
26Year	1	0		having work	ART	Dichorionic	37	17.5	No	Diet	No	No	Undergraduate course	164	73.5	20.8	3.5	229	103	0.322	6.78	2.15	34.6	296	57	19	134	No	No	No	No					37	cesarean section	twin pregnancy	No	No	No	No	2600	2750	YY	No	No	No	No
32Year	1	0		having work	ART	Dichorionic	35	12	No	Diet	No	No	Master	159	64.5	21.5	3.26	210	103	0.304	6	2.57	34.5	212	47	13	115	Yes	No	No	No					36	cesarean section	twin pregnancy	No	No	Yes	No	2500	2370	XX	No	No	No	No
27Year	1	0		having work	Spontaneous	Dichorionic	37	12.1	No	Diet	No	No	Undergraduate course	163	74.9	23.6	3.47	282	112	0.34	5.5	2.71	37.2	291	57	6	127	No	No	No	No					37	cesarean section	twin pregnancy	No	No	No	No	2250	2280	YY	No	No	Two babies had admission to NICU	Two babies had
30Year	2	1	2	having work	Spontaneous	Dichorionic	36	21	No	Diet	No	No	Undergraduate course	162	81	22.8	3.65	198	122	0.373	6.38	2.22	31.9	228	50	15	135	No	No	No	No					37	cesarean section	twin pregnancy	No	No	No	No	2670	2650	XX	No	No	Two babies had admission to NICU	No
26Year	2	0		having work	Spontaneous	Dichorionic	35	26	No	Diet	No	Yes	Undergraduate course	166	90	23.2	3.34	228	107	0.321	6.03	3.78	32.7	315	53	15	139	Yes	Yes	No	No					35	cesarean section	twin pregnancy	No	No	No	No	2370	2380	XY	One baby had	No	Two babies had admission to NICU	No
32Year	2	0		having work	Spontaneous	Monochorionic	35	10.8	No	Diet	No	No	postgraduate	160	67.3	22	3.52	275	105	0.32	9.24	3.58	34.7	208	50	10	157	Yes	No	No	No					36	cesarean section	twin pregnancy	No	No	No	No	2010	2320	XX	No	No	Two babies had admission to NICU	No
29Year	2	0		having work	ART	Dichorionic	37	25	No	Diet	No	Yes	Undergraduate course	162	82	21.7	3.53	163	121	0.361	7.34	2.28	32.5	274	55	14	146	No	No	Yes	Yes	37	161	102	690	37	cesarean section	twin pregnancy，preeclampsia	No	No	No	No	3030	2330	YY	No	No	No	No
33Year	2	0		having work	ART	Dichorionic	37	15.1	No	Diet	No	No	Undergraduate course	159	74	23.2	3.49	134	120	0.361	6.69	2.76	35.6	375	58	15		Yes	No	No	No					37	cesarean section	twin pregnancy	No	No	No	No	2550	2350	XY	No	No	No	No
31Year	2	0		no work	Spontaneous	Monochorionic	34	15	No	Diet	No	No	Junior college	158	74	23.6	3.5	294	109	0.33	7.53	3.15	33.7	227	55	12	137	Yes	No	No	No					34	cesarean section	twin pregnancy	No	No	No	No	1810	2040	XX	No	No	Two babies had admission to NICU	No
28Year	1	0		having work	Spontaneous	Dichorionic	35	19.4	No	Diet	No	No	Undergraduate course	163	74.4	20.7	3.61	350	112	0.348	6.26	2.98	33.4	162	43	9	133	Yes	No	No	No					35	cesarean section	twin pregnancy	No	No	No	No	2370	2400	XY	No	No	Two babies had admission to NICU	No
33Year	3	0		having work	Spontaneous	Dichorionic	36	9	No	Diet	No	No	Master	150	53	19.5	3.71	170	124	0.37	6.55	3.44	32.7	242	56	9	152	No	Yes	No	No					37	cesarean section	twin pregnancy	No	No	No	No	2120	2310	XY	No	No	One baby had admission to NICU	No
29Year	2	1	2	having work	Spontaneous	Dichorionic	24	8	No	Diet	No	No	Undergraduate course	157	68	24.3	3.67	225	118	0.356	3.83	4.36	34.4	355	53	7	153	Yes	No	No	No					34	cesarean section	twin pregnancy	No	No	No	No	2670	2330	XY	No	No	Two babies had admission to NICU	No
31Year	1	0		having work	Spontaneous	Monochorionic	36	19	No	Diet	No	Yes	Undergraduate course	165	84	23.8	3.99	208	125	0.377	4.28	2.02	35.2	339	55	30	121	No	No	Yes	Yes	36	157	96	736	36	cesarean section	twin pregnancy	No	No	No	No	2110	2120	YY	No	No	Two babies had admission to NICU	One baby had
30Year	2	1	7	having work	Spontaneous	Dichorionic	37	20	No	Diet	No	No	Undergraduate course	158	70	20	3.47	243	112	0.346	8.3	4.25	33.8	236	48	9	108	No	No	No	No					37	cesarean section	twin pregnancy	No	No	No	No	2320	2310	XY	No	No	No	No
33Year	1	0		having work	Spontaneous	Dichorionic	35	12.4	No	Diet	No	No	Undergraduate course	152	55.4	18.6	3.1	137	108	0.32	6.56	1.81	34.1	253	52	10	159	Yes	No	No	No					35	cesarean section	twin pregnancy	No	No	No	No	2490	2630	XY	No	No	No	No
31Year	2	0		having work	Spontaneous	Dichorionic	37	16	No	Diet	No	No	Undergraduate course	165	72	20.2	3.57	216	107	0.334	7.05	2.69	31.6	214	55	10	135	No	No	No	No					37	cesarean section	twin pregnancy	No	No	No	No	2630	2350	YY	No	No	No	No
33Year	2	0		having work	ART	Dichorionic	37	15.2	No	Diet	No	No	postgraduate	160	71.2	21.8	3.4	203	111	0.34	3.99	2.89	34	235	59	27	132	No	No	No	No					38	cesarean section	twin pregnancy	No	No	No	No	2840	2840	XY	No	No	No	No
31Year	2	0		having work	ART	Dichorionic	37	17	No	Diet	No	No	polytechnic school	163	66	18.4	3.65	173	113	0.346	7.11	2.4	30.8	125	49	10	148	No	Yes	No	No					37	cesarean section	twin pregnancy	No	No	No	No	2940	3000	XY	No	No	No	No
29Year	1	0		having work	ART	Dichorionic	35	13.8	No	Diet	No	No	High school	158	61.3	19	2.74	231	94	0.282	8.35	2.61	34.7	303	54	14	126	Yes	No	No	No					35	cesarean section	Severe ICP	No	No	No	No	2320	2200	XY	No	No	One baby had admission to NICU	No
37Year	1	0		having work	ART	Dichorionic	36	13	No	Diet	Antiphospholipid antibody syndrome	Yes	Junior college	164	67.5	20	3.14	150	111	0.333	6.5	2.38	33.8	230	51	15	139	No	No	No	No					37	cesarean section	twin pregnancy	No	No	No	No	2580	2450	XY	No	No	No	No
36Year	1	0		having work	ART	Dichorionic	37	20	No	Diet	No	No	Undergraduate course	159	70	19.7	3.71	155	123	0.361	7.44	2.95	37.5	284	53	16	176	No	Yes	No	No					37	cesarean section	twin pregnancy	No	No	No	No	2650	2275	XY	No	No	One baby had admission to NICU	No
28Year	2	0		no work	Spontaneous	Dichorionic	36	14.5	No	Diet	No	No	Undergraduate course	157	66.5	21	3.42	188	109	0.332	6.75	1.83	32.2	162	52	12	152	No	No	No	No					37	cesarean section	twin pregnancy	No	No	No	No	2950	2410	XY	No	No	No	No
25Year	1	0		no work	Spontaneous	Dichorionic	37	23	No	Diet	No	No	Undergraduate course	166	83	21.7	4.09	169	119	0.352	7.31	2.02	34.2	257	56	30	157	No	No	No	No					37	cesarean section	twin pregnancy	No	No	No	No	2450	3050	XY	No	No	One baby had admission to NICU	No
31Year	4	2	6	no work	ART	Dichorionic	35	17	No	Diet	No	No	polytechnic school	169	86	20.6	3.49	221	113	0.336	6.75	1.85	31.5	357	62	21	179	No	No	No	No					35	cesarean section	twin pregnancy	No	No	No	No	2340	2500	XY	No	No	No	No
25Year	2	0		having work	Spontaneous	Dichorionic	33	19	No	Diet	No	No	Junior college	165	73	19.8	3.73	145	122	0.355	6.14	2.2	35.1	209	47	28	145	Yes	No	Yes	No					34	cesarean section	twin pregnancy	No	No	No	No	1740	1740	XX	No	No	Two babies had admission to NICU	One baby had
32Year	1	0		having work	ART	Dichorionic	35	18	No	Diet	No	No	Junior college	160	73	21.4	3.88	254	122	0.363	6.37	2.22	32.8	168	51	23	143	No	No	No	No					35	cesarean section	twin pregnancy	No	No	No	No	3150	2600	YY	No	No	Two babies had admission to NICU	One baby had
27Year	1	0		having work	Spontaneous	Monochorionic	36	12.2	No	Diet	No	No	Undergraduate course	161	60.2	18.5	4.06	259	129	0.374	7.7	2.51	35.6	255	49	10	199	Yes	No	No	No					36	cesarean section	twin pregnancy	No	No	No	No	2070	2500	YY	No	No	One baby had admission to NICU	One baby had
28Year	1	0		having work	ART	Dichorionic	36	16.7	No	Diet	No	No	Undergraduate course	166	60.7	19.5	3.83	211	122	0.37	5.85	2.08	34.3	233	44	8	125	No	No	No	No					36	cesarean section	twin pregnancy	No	No	No	No	2280	2160	XX	No	No	Two babies had admission to NICU	No
31Year	2	0		having work	ART	Dichorionic	35	14	No	Diet	No	No	Junior college	165	86	26.4	3.73	177	123	0.362	7.63	2.83	31.9	234	51	17	168	No	No	No	No					35	cesarean section	Severe ICP	No	No	No	No	2700	2450	XY	No	No	Two babies had admission to NICU	Two babies had
33Year	5	1	9	no work	Spontaneous	Dichorionic	34	13	No	Diet	No	Yes	Junior college	153	62	20.9	3.35	238	111	0.325	7.11	2.24	31.4	249	51	20	143	Yes	No	No	No					35	cesarean section	twin pregnancy，Scarred uterus	No	No	No	No	2300	2230	XX	No	No	Two babies had admission to NICU	No
32Year	2	1	4	having work	Spontaneous	Monochorionic	34	11.2	No	Diet	No	No	Undergraduate course	160	64.2	20.7	3.58	342	83	0.262	5.29	2.58	34.1	204	48	13	183	Yes	No	No	No					34	cesarean section	twin pregnancy	No	No	No	No	2170	2270	XX	No	No	Two babies had admission to NICU	No
27Year	1	0		having work	Spontaneous	Dichorionic	37	16	No	Diet	No	No	Undergraduate course	165	65	17.9	3.47	209	112	0.338	8.1	2.22	34.2	264	54	12	109	No	No	No	No					37	cesarean section	twin pregnancy	No	No	No	No	2590	2450	XY	No	No	No	No
30Year	4	1	2	no work	Spontaneous	Dichorionic	36	16	No	Diet	No	No	Undergraduate course	168	69	18.6	3.51	224	107	0.318	6.59	2.2	35.5	225	45	6	138	No	No	No	No					36	cesarean section	twin pregnancy	No	No	No	No	2650	2600	YY	No	No	No	No
31Year	4	1	7	having work	Spontaneous	Dichorionic	30	5.3	No	Diet	No	No	Middle school	163	68.3	24.6	3.27	124	108	0.32	6.12	1.98	35.2	266	51	21	163	Yes	No	No	No					31	cesarean section	twin pregnancy，Scarred uterus	No	No	No	No	1510	1520	YY	No	No	Two babies had admission to NICU	No
24Year	3	0		no work	ART	Dichorionic	36	20	No	Diet	No	No	Junior college	158	60	16	3.12	213	102	0.298	6.18	2.96	35.2	261	47	8	179	Yes	No	No	No					36	cesarean section	twin pregnancy	No	No	No	No	2560	2550	XY	No	No	Two babies had admission to NICU	No
31Year	1	0		having work	ART	Dichorionic	33	10	No	Diet	No	No	postgraduate	158	65	22	3.51	199	111	0.334	6.8	3.67	34.6	228	53	10	132	Yes	No	No	No					33	cesarean section	twin pregnancy	No	No	No	No	1870	1980	XY	No	No	Two babies had admission to NICU	One baby had
23Year	1	0		having work	Spontaneous	Dichorionic	35	9.9	No	Diet	No	No	polytechnic school	162	51.9	16	3.18	296	90	0.275	7.36	1.76	35.4	262	59	6	145	Yes	No	No	No					36	cesarean section	twin pregnancy	No	No	No	No	2240	2060	YY	No	No	Two babies had admission to NICU	Two babies had
35Year	1	0		having work	ART	Dichorionic	34	15.5	No	Diet	No	No	Undergraduate course	160	80.5	25.3	3.1	130	97	0.292	4.64	1.91	31.3	306	52	9	102	Yes	No	No	No					35	cesarean section	twin pregnancy	No	No	No	No	2690	3060	XX	No	No	Two babies had admission to NICU	One baby had
30Year	1	0		having work	Spontaneous	Monochorionic	36	23	No	Diet	No	No	Undergraduate course	162	88	24.7	4.33	239	129	0.389	6.35	2.89	37.1	330	44	13	141	No	No	No	No					36	cesarean section	twin pregnancy	No	No	No	No	2710	2430	XX	No	No	Two babies had admission to NICU	No
33Year	3	0		having work	ART	Dichorionic	35	16	No	Diet	No	No	High school	171	76	21.2	3.22	153	106	0.314	7.01	3.45	35	323	48	10	141	No	No	No	No					35	cesarean section	twin pregnancy	No	No	No	No	2790	2110	XY	No	No	One baby had admission to NICU	One baby had
26Year	1	0		having work	Spontaneous	Dichorionic	37	21.1	No	Diet	No	Yes	Junior college	163	68	17.6	3.72	213	120	0.353	6.11	2.24	34.4	273	51	5	176	No	No	Yes	No					37	cesarean section	twin pregnancy	No	No	No	No	2400	2710	XY	No	No	No	No
21Year	1	0		having work	Spontaneous	Dichorionic	37	18	No	Diet	No	No	Junior college	173	98	26.7	3.25	207	104	0.317	5.03	3.04	34.8	316	57	11	157	Yes	No	No	No					37	cesarean section	twin pregnancy	No	No	No	No	2950	2850	XX	No	No	Two babies had admission to NICU	One baby had
27Year	2	0		having work	ART	Dichorionic	36	21.6	No	Diet	No	No	High school	169	78.6	20.2	3.83	184	119	0.354	6.53	1.86	33.9	261	48	12	132	Yes	No	No	No					37	cesarean section	twin pregnancy	No	No	No	No	2250	2500	XY	No	No	One baby had admission to NICU	No
28Year	2	1	3	having work	Spontaneous	Monochorionic	35	14.5	No	Diet	No	No	Junior college	164	68.5	20	3.58	133	107	0.322	5.99	3.94	32.1	317	55	5		No	No	No	No					36	cesarean section	twin pregnancy	No	No	No	No	2290	2400	XX	No	No	One baby had admission to NICU	One baby had
22Year	1	0		having work	Spontaneous	Dichorionic	33	17	No	Diet	No	No	High school	160	82	25.3	5.15	280	111	0.347	5.66	2.59	34.3	348	59	11	181	Yes	No	No	No					33	cesarean section	twin pregnancy	No	No	Yes	No	1980	2190	XY	No	No	Two babies had admission to NICU	No
32Year	1	0		having work	ART	Dichorionic	36	10	No	Diet	No	No	Undergraduate course	166	63	19.2	3.74	273	117	0.349	7.98	2.35	37.6	285	54	12	123	Yes	No	No	No					36	cesarean section	twin pregnancy	No	No	No	No	2400	2470	XY	No	No	No	No
29Year	1	0		having work	ART	Dichorionic	36	18.2	No	Diet	Sharpe syndrome	No	Undergraduate course	163	74.7	21.2	3.49	260	110	0.329	7.5	3.81	34.3	365	58	10	145	Yes	Yes	No	No					37	cesarean section	twin pregnancy	No	No	No	No	2900	2410	XY	No	No	No	No
31Year	2	0		having work	ART	Dichorionic	36	11	No	Diet	No	No	Master	163	59	22.2	3.57	228	108	0.322	9.2	2.61	34.8	172	53	9	181	No	No	No	No					37	cesarean section	twin pregnancy	No	No	No	No	2590	2290	XX	No	No	One baby had admission to NICU	One baby had
23Year	1	0		no work	Spontaneous	Monochorionic	36	16.5	No	Diet	No	No	Junior college	163	61.5	16.9	2.86	196	80	0.245	6.79	2.1	29.7	196	57	9	148	Yes	No	No	No					36	cesarean section	twin pregnancy，Severe ICP	No	No	No	No	2540	2430	XX	No	No	No	No
31Year	1	0		having work	ART	Dichorionic	35	19	No	Diet	No	No	Middle school	160	82	24.6	4.07	214	129	0.384	5.99	2.51	38	306	45	23	149	No	No	No	No					35	cesarean section	twin pregnancy	Yes	No	No	No	2470	2810	XY	No	No	Two babies had admission to NICU	One baby had
26Year	2	0		having work	Spontaneous	Dichorionic	36	9.5	No	Diet	No	Yes	Undergraduate course	163	64.5	20.7	3.87	298	115	0.345	5.72	1.92	36.7	213	47	7	124	No	No	No	No					36	cesarean section	twin pregnancy	No	No	No	No	2500	2130	XX	No	No	One baby had admission to NICU	One baby had
23Year	2	0		having work	Spontaneous	Monochorionic	36	13	No	Diet	No	No	Undergraduate course	160	67	21	3.24	185	105	0.303	6.01	1.55	36.5	177	53	53	153	No	No	No	No					36	cesarean section	Fetal distress	No	No	No	No	1800	2050	XX	One baby had	No	Two babies had admission to NICU	No
27Year	1	0		having work	Spontaneous	Monochorionic	36	12.5	No	Diet	No	No	Junior college	169	75.5	22	3.54	240	106	0.318	6.34	2.21	35.1	263	54	6	159	No	No	No	No					36	cesarean section	twin pregnancy	No	No	No	No	2450	2390	XX	No	No	Two babies had admission to NICU	No
33Year	1	0		having work	ART	Dichorionic	35	15	No	Diet	No	No	Undergraduate course	158	62	18.8	3.37	136	111	0.329	6.25	2.31	34.2	202	53	61	135	Yes	No	No	No					36	cesarean section	twin pregnancy	No	No	No	No	3030	1360	XY	No	No	Two babies had admission to NICU	No
25Year	1	0		having work	Spontaneous	Dichorionic	36	13.6	No	Diet	No	No	Undergraduate course	160	64.6	19.6	3.64	146	122	0.357	6.14	2.36	34.8	221	57	21	167	No	No	No	No					36	cesarean section	twin pregnancy	No	No	No	No	2380	2290	YY	No	No	One baby had admission to NICU	No
36Year	2	1	9	having work	Spontaneous	Monochorionic	32	10	No	Diet	No	No	Undergraduate course	168	67	20.1	3.52	204	121	0.347	6.75	3.88	35.9	208	57	8	166	Yes	No	No	No					32	cesarean section	twin pregnancy	No	No	No	No	2020	2010	YY	No	No	Two babies had admission to NICU	No
38Year	4	1	13	having work	Spontaneous	Monochorionic	34	27.7	No	Diet	No	Yes	Junior college	162	92.7	24.7	3.75	256	116	0.345	7.3	3.12	36.4	293	59	24	153	Yes	No	Yes	Yes	34	155	104	395	35	cesarean section	preeclampsia，twin pregnancy	No	No	No	No	2420	2370	XX	No	No	Two babies had admission to NICU	Two babies had
27Year	1	0		having work	Spontaneous	Monochorionic	31	10	No	Diet	No	No	postgraduate	158	63	21.2	3.06	185	104	0.302	5.65	2.12	33.2	232	50	14	154	Yes	No	No	No					32	cesarean section	Vasa previa	No	No	No	No	1420	1610	XX	One baby had	No	Two babies had admission to NICU	No
29Year	1	0		having work	Spontaneous	Monochorionic	28	12.8	No	Diet	No	No	Undergraduate course	167	71.7	21.1	4.08	253	126	0.374	8.23	3.64	37.4	255	51	23	161	Yes	No	No	No					29	cesarean section	Selective fetal growth restriction	No	No	Yes	No	1380	960	XX	One baby had	No	Two babies had admission to NICU	One baby had
30Year	1	0		having work	ART	Dichorionic	36	17	No	Diet	No	No	Undergraduate course	161	71	20.8	3.33	226	109	0.326	7.71	2.5	32.3	203	49	14	156	No	No	No	No					37	cesarean section	twin pregnancy	No	No	No	No	3040	2720	XX	No	No	No	No
30Year	1	0		having work	Spontaneous	Dichorionic	35	13.1	No	Diet	No	No	Undergraduate course	160	68	21.4	3.88	309	114	0.341	6.86	2.08	34.4	231	56	22	146	Yes	No	No	No					35	cesarean section	twin pregnancy	No	No	No	No	2170	1880	XX	No	No	Two babies had admission to NICU	Two babies had
23Year	2	0		having work	Spontaneous	Dichorionic	37	20.6	No	Diet	No	No	Middle school	161	66.6	17.7	4.14	195	123	0.371	6.44	2.68	34.3	311	52	9	167	No	No	No	No					37	cesarean section	twin pregnancy	No	No	No	No	2730	2570	YY	No	No	No	No
33Year	1	0		having work	ART	Dichorionic	37	12.6	No	Diet	No	No	Undergraduate course	165	67.6	20.2	3.27	186	112	0.332	6.43	1.84	36.9	206	55	27	157	No	No	No	No					37	cesarean section	twin pregnancy	No	No	No	No	2490	2320	XY	No	No	No	No
26Year	2	0		having work	ART	Dichorionic	37	17.5	No	Diet	No	No	Middle school	165	70	19.2	3.45	213	110	0.339	4.75	2.08	35.5	255	51	14	260	No	No	No	No					37	cesarean section	twin pregnancy	No	No	No	No	2910	2690	XY	No	No	No	No
29Year	3	1	4	having work	Spontaneous	Dichorionic	37	9.3	No	Diet	No	No	postgraduate	161	73.3	24.6	3.77	201	120	0.355	6.85	3.07	32.6	276	59	8	134	Yes	No	No	No					37	cesarean section	twin pregnancy	No	No	No	No	2680	2390	XX	No	No	No	No
32Year	1	0		having work	ART	Dichorionic	34	14	No	Diet	No	No	Undergraduate course	156	64	20.5	4.25	153	137	0.402	5.82	3	32.5	285	57	22	161	Yes	No	Yes	No					35	cesarean section	Placental abruption	No	No	Yes	No	2250	2270	XY	No	No	Two babies had admission to NICU	No
34Year	2	1	7	having work	ART	Dichorionic	37	9.2	No	Diet	No	No	Undergraduate course	158	67.2	19.2	3.32	229	103	0.313	8.2	2.36	32.8	320	56	22		Yes	No	No	No					37	cesarean section	twin pregnancy	No	No	No	No	2350	2650	XY	No	No	No	No
29Year	1	0		having work	Spontaneous	Dichorionic	32	13.2	No	Diet	No	No	Undergraduate course	160	49.3	19.2	3.22	223	107	0.319	7.1	2.37	30	251	53	13	133	Yes	No	No	No					32	cesarean section	twin pregnancy	No	No	Yes	No	1520	1860	XY	No	No	Two babies had admission to NICU	No
35Year	1	0		having work	ART	Dichorionic	37	12	No	Diet	No	No	Junior college	153	75	22.6	4.03	221	130	0.385	5.17	2.47	34.4	296	54	12	171	No	No	No	No					37	cesarean section	twin pregnancy	No	No	No	No	2900	1810	XY	No	No	Two babies had admission to NICU	No
32Year	2	1	4	having work	Spontaneous	Dichorionic	37	19.6	No	Diet	No	Yes	Undergraduate course	170	77.1	19.8	3.48	297	111	0.324	8.3	2.33	32	289	55	13	127	No	No	No	No					37	cesarean section	twin pregnancy	No	No	No	No	2730	2650	XX	No	No	No	No
33Year	2	0		no work	Spontaneous	Monochorionic	35	25.1	No	Diet	No	Yes	High school	150	80.1	24.4	3.44	202	99	0.312	5.99	2.17	31.9	242	51	11	120	Yes	No	No	No					35	cesarean section	twin pregnancy	No	No	No	No	2410	2300	YY	No	No	Two babies had admission to NICU	One baby had
31Year	3	0		having work	Spontaneous	Monochorionic	31	12	No	Diet	No	No	Junior college	160	62	19.5	3.44	171	108	0.318	7.1	2.77	35	315	60	21	197	Yes	Yes	Yes	Yes	35	160	96	Pro2+	35	cesarean section	twin pregnancy	Yes	No	No	No	1600	2270	XX	No	No	Two babies had admission to NICU	Two babies had
31Year	1	0		having work	ART	Dichorionic	33	11	No	Diet	No	No	Undergraduate course	163	58	17.6	3.78	205	86	0.272	6.1	1.97	32.6	246	53	8	133	Yes	No	No	No					33	cesarean section	Fetal distress	No	No	No	No	1790	1800	XX	No	No	Two babies had admission to NICU	Two babies had
35Year	2	0		having work	ART	Dichorionic	35	19	No	Diet	No	No	Master	167	84	23.3	4.21	160	141	0.413	7.12	3.96	35.5	199	50	16	175	No	No	Yes	Yes	35	149	91	741	36	cesarean section	twin pregnancy	Yes	No	No	No	3640	3740	YY	No	No	One baby had admission to NICU	No
28Year	3	1	4	having work	Spontaneous	Dichorionic	34	32	No	Diet	No	No	Undergraduate course	160	82	19.5	3.65	175	129	0.382	8.03	2.02	33	240	41	22	165	Yes	No	No	No					34	cesarean section	twin pregnancy，Scarred uterus	No	No	No	No	2030	2240	XY	No	No	Two babies had admission to NICU	No
36Year	3	0		having work	ART	Dichorionic	37	14	No	Diet	No	No	Junior college	159	57	17	3.64	297	106	0.324	9.52	2.16	31.4	338	56	15	151	No	No	No	No					37	cesarean section	twin pregnancy	No	No	No	No	2010	2980	XY	No	No	One baby had admission to NICU	One baby had
25Year	2	1	2	no work	Spontaneous	Dichorionic	37	12	No	Diet	No	No	Junior college	160	65	20.7	3.82	164	129	0.371	7.24	3.47	34.8	301	44	13		No	No	No	No					37	vaginal delivery		No	No	No	No	2430	2690	XY	No	No	One baby had admission to NICU	No
36Year	3	1	6	having work	ART	Dichorionic	37	17	No	Diet	No	No	Junior college	160	75.7	22.9	3.49	204	103	0.315	3.89	2.97	31.9	245	48	9	124	No	Yes	No	No					37	cesarean section	twin pregnancy	No	No	No	No	2970	3020	YY	No	No	No	No
34Year	2	0		no work	Spontaneous	Dichorionic	37	16	No	Diet	No	Yes	Undergraduate course	164	76	22.3	3.58	154	112	0.335	6.24	2.01	33.9	291	52	20	144	No	No	No	No					37	cesarean section	twin pregnancy	No	No	No	No	3010	2620	XX	No	No	One baby had admission to NICU	No
37Year	2	1	9	having work	ART	Dichorionic	35	6.5	No	Diet	No	No	Undergraduate course	160	64.5	18.7	4.43	191	132	0.406	8.27	3.79	36.1	232	52	13	327	Yes	No	Yes	Yes	35	146	86	302	35	cesarean section	twin pregnancy	No	No	No	No	2210	2220	YY	No	No	Two babies had admission to NICU	No
25Year	1	0		having work	Spontaneous	Dichorionic	37	12.5	No	Diet	No	No	Undergraduate course	154	72	25	4.3	250	129	0.386	6.16	2.55	37.6	337	58	10	170	No	No	No	No					37	cesarean section	twin pregnancy	No	No	No	No	2700	2730	YY	No	No	No	No
33Year	1	0		having work	ART	Dichorionic	36	17	No	Diet	No	No	polytechnic school	164	83	24.5	3.35	383	107	0.32	7.41	2.66	34	152	45	7	178	No	No	No	No					37	cesarean section	twin pregnancy	No	No	No	No	2980	3070	XY	No	No	One baby had admission to NICU	No
28Year	2	0		having work	Spontaneous	Dichorionic	37	21.6	No	Diet	No	Yes	Undergraduate course	163	61.6	15	3.68	188	122	0.362	9.88	4.11	36.8	285	36	16		No	Yes	No	No					37	cesarean section	twin pregnancy	No	No	No	No	3010	2310	YY	No	No	One baby had admission to NICU	One baby had
30Year	1	0		having work	ART	Dichorionic	36	20.6	No	Diet	No	Yes	Undergraduate course	165	76.2	20.4	3.69	210	113	0.341	6.29	2.74	30.6	289	46	19	170	No	No	No	No					36	cesarean section	twin pregnancy	No	No	No	No	2750	2720	XX	No	No	Two babies had admission to NICU	No
33Year	3	1	5	having work	Spontaneous	Dichorionic	37	13	No	Diet	No	Yes	Undergraduate course	158	87	29.6	4.12	186	129	0.38	6.24	2.2	34	241	46	22	162	No	No	No	No					37	cesarean section	twin pregnancy	No	No	No	No	2270	2970	XY	No	No	One baby had admission to NICU	No
35Year	2	0		having work	ART	Dichorionic	36	13	No	Diet	No	No	Undergraduate course	160	73	19.5	3.78	229	110	0.337	7.23	2.06	32.1	208	57	27	174	Yes	No	No	No					36	cesarean section	twin pregnancy	No	No	No	No	2930	2750	XY	No	No	Two babies had admission to NICU	No
30Year	2	1	3	having work	Spontaneous	Monochorionic	36	18	No	Diet	No	No	Undergraduate course	153	70	21.9	4.17	263	127	0.377	7.63	2.61	38	378	63	12	124	No	No	No	No					36	cesarean section	twin pregnancy	No	No	No	No	2550	2570	XX	No	No	Two babies had admission to NICU	No
29Year	2	1	2	having work	Spontaneous	Dichorionic	37	22	No	Diet	No	No	Junior college	166	78	20.3	3.8	229	135	0.392	6.38	2.58	36.5	235	47	12	141	No	No	No	No					37	cesarean section	twin pregnancy	No	No	No	No	2700	2430	XX	No	No	Two babies had admission to NICU	No
33Year	3	0		no work	ART	Dichorionic	37	12	No	Diet	No	No	Junior college	152	62	21.3	3.34	374	101	0.3	4.21	3.67	36.1	228	35	6	134	No	No	No	No					37	cesarean section	twin pregnancy	No	No	No	No	2200	2600	XX	No	No	One baby had admission to NICU	One baby had
42Year	2	1	18	having work	ART	Dichorionic	30	17	No	Diet	No	No	Middle school	158	75	22	3.57	183	107	0.319	6.82	3.01	35.5	280	39	11	160	Yes	No	No	No					30	cesarean section	twin pregnancy，Scarred uterus	No	No	No	No	1270	1260	YY	No	No	Two babies had admission to NICU	No
33Year	1	0		having work	ART	Dichorionic	36	14	No	Diet	No	No	Junior college	152.5	68	23.2	3.79	255	125	0.361	5.79	3.97	34.3	341	47	8	133	No	No	Yes	No					37	cesarean section	twin pregnancy	No	No	No	No	2650	2210	XY	No	No	One baby had admission to NICU	One baby had
28Year	1	0		having work	Spontaneous	Dichorionic	36	13.7	No	Diet	No	No	Junior college	163	66.7	19.9	3.25	207	103	0.308	8.18	3.78	37.1	109	32	18	126	Yes	No	No	No					36	cesarean section	twin pregnancy	No	No	No	No	2410	2270	YY	No	No	Two babies had admission to NICU	No
29Year	2	0		no work	ART	Dichorionic	31	14	No	Diet	No	No	Junior college	160	72	22.6	3.32	315	108	0.324	6.07	3.04	32.8	223	32	17		Yes	No	No	No					34	cesarean section	twin pregnancy	No	No	Yes	No	2580	2370	YY	No	No	Two babies had admission to NICU	No
32Year	1	0		no work	ART	Dichorionic	36	16.5	No	Diet	No	No	Undergraduate course	158	63.5	19	3.5	203	113	0.334	7.58	2.1	37.6	325	38	22	179	Yes	No	No	No					36	cesarean section	Twins, borderline placenta previa	No	No	Yes	No	2650	2270	XY	No	No	One baby had admission to NICU	No
23Year	2	1	4	no work	Spontaneous	Monochorionic	36	11.5	No	Diet	No	No	Middle school	163	82.5	26.7	3.48	159	101	0.305	6.79	3.91	35.4	267	45	9	140	No	No	No	No					37	cesarean section	twin pregnancy	No	No	No	No	2170	2340	XX	No	No	One baby had admission to NICU	No
32Year	1	0		having work	ART	Dichorionic	36	13.5	No	Diet	No	No	Undergraduate course	165	66	19.2	3.6	306	121	0.338	7.02	2.31	33.2	249	42	13	152	Yes	No	No	No					36	cesarean section	Severe ICP	No	No	No	No	2130	2240	XY	No	No	Two babies had admission to NICU	No
33Year	1	0		having work	ART	Dichorionic	35	20	No	Diet	No	Yes	Undergraduate course	165	69	17.9	3.01	134	110	0.32	7.91	3.41	30.8	306	45	14		Yes	No	No	No					35	cesarean section	Severe ICP	No	No	No	No	2250	2240	YY	No	No	Two babies had admission to NICU	Two babies had
35Year	2	1	12	having work	ART	Dichorionic	36	11.2	No	Diet	No	No	Junior college	160	82.2	27.7	3.87	147	121	0.35	4.49	2.62	34.3	285	37	15	145	No	No	No	No					37	cesarean section	twin pregnancy	No	No	No	No	3110	2870	XY	No	No	One baby had admission to NICU	No
25Year	1	0		having work	Spontaneous	Monochorionic	36	20	No	Diet	No	No	Junior college	172	80	20.2	3.65	251	120	0.345	5.18	2.95	32.9	239	35	9	159	Yes	No	No	No					36	cesarean section	twin pregnancy	No	No	No	No	2780	2480	XX	No	No	No	No
31Year	1	0		having work	ART	Dichorionic	36	17.5	No	Diet	No	No	Undergraduate course	164	82	23.9	3.25	127	110	0.306	7.15	1.46	34.9	253	42	14	156	No	No	No	No					37	cesarean section	twin pregnancy	No	No	No	No	2530	3050	XY	No	No	Two babies had admission to NICU	One baby had
34Year	1	0		having work	ART	Dichorionic	37	11	No	Diet	No	No	Undergraduate course	162	81	26.6	3.96	161	139	0.395	7.28	3.1	38.7	258	37	17	177	No	No	No	No					37	cesarean section	twin pregnancy	No	No	Yes	No	2820	2490	YY	No	No	One baby had admission to NICU	One baby had
32Year	2	1	5	having work	Spontaneous	Dichorionic	37	22.2	No	Diet	No	No	Undergraduate course	170	95.7	25.4	3.7	214	120	0.348	5.9	1.91	33.1	276	39	15	142	Yes	No	No	No					37	cesarean section	twin pregnancy	No	No	No	No	3320	2630	XX	No	No	One baby had admission to NICU	No
34Year	2	0		having work	ART	Dichorionic	36	19	No	Diet	No	No	Undergraduate course	162	94	28.5	3.99	361	116	0.339	9.02	3.48	37.9	318	48	16	224	Yes	No	No	No					36	cesarean section	twin pregnancy	No	No	No	No	2200	2380	XX	No	No	One baby had admission to NICU	No
32Year	3	0		having work	ART	Dichorionic	36	16.5	No	Diet	Antiphospholipid antibody syndrome	No	polytechnic school	160	65	18.9	3.43	222	104	0.313	7.69	3.68	36.9	208	40	8	146	No	Yes	No	No					37	cesarean section	twin pregnancy	No	No	No	No	2300	2415	XX	No	No	One baby had admission to NICU	No
40Year	4	0		having work	ART	Dichorionic	37	9.5	No	Diet	No	No	Undergraduate course	158	62.5	17.2	3.6	196	119	0.353	7.62	3.25	31.3	361	44	12		No	No	No	No					37	cesarean section	twin pregnancy	No	No	No	No	2560	2630	XX	No	No	No	No
29Year	2	0		no work	ART	Dichorionic	35	23	No	Diet	No	No	Junior college	166	72.5	17.9	3.63	256	118	0.343	6.48	2.22	33.8	168	37	10	131	Yes	No	No	No					37	cesarean section	twin pregnancy	No	No	Yes	No	2850	2860	XX	No	No	One baby had admission to NICU	No
28Year	3	0		having work	ART	Dichorionic	37	30.5	No	Diet	No	No	Junior college	164	94.5	23.7	3.3	286	105	0.305	6.15	3.29	36.1	323	46	11	148	No	No	No	No					37	cesarean section	twin pregnancy	No	No	No	No	2650	2800	XX	No	No	No	No
32Year	1	0		having work	ART	Dichorionic	37	10.5	No	Diet	No	No	postgraduate	161	62	20	3.52	233	111	0.319	5.98	2.61	35.2	282	59	7	156	No	No	No	No					37	cesarean section	twin pregnancy	No	No	No	No	2320	2180	YY	No	No	One baby had admission to NICU	No
32Year	1	0		having work	ART	Dichorionic	36	15.5	No	Diet	No	No	Undergraduate course	160	65.5	19.5	3.84	201	125	0.361	5.69	2.29	38.6	195	38	15	147	Yes	No	No	No					36	cesarean section	twin pregnancy	No	No	No	No	2180	2650	XX	No	No	Two babies had admission to NICU	One baby had
33Year	1	0		having work	ART	Dichorionic	36	11.5	No	Diet	No	No	postgraduate	160	58.5	18.3	3.14	249	105	0.311	6.72	2.74	34.4	191	38	17	153	No	No	No	No					37	cesarean section	twin pregnancy	No	No	No	No	2650	2620	XY	No	No	No	No
37Year	2	0		having work	ART	Dichorionic	35	12.2	No	Diet	Antiphospholipid antibody syndrome	No	Undergraduate course	157	57.2	18	3.41	179	115	0.333	8.53	2.02	31.7	304	44	12		Yes	Yes	No	No					36	cesarean section	twin pregnancy	No	No	No	No	1950	2230	XY	No	No	Two babies had admission to NICU	No
34Year	1	0		having work	ART	Monochorionic	32	19	No	Diet	No	No	Junior college	166	79	21.7	3.48	215	120	0.35	7.38	1.52	38	293	47	7	132	Yes	No	No	No					34	cesarean section	twin pregnancy	No	No	No	No	2040	2160	YY	No	No	Two babies had admission to NICU	Two babies had
29Year	1	0		having work	Spontaneous	Dichorionic	37	18.7	No	Diet	No	Yes	Undergraduate course	168	78.7	21.2	3.43	288	108	0.315	5.4	3.12	35.1	230	34	15	111	No	No	No	No					37	cesarean section	twin pregnancy	No	No	No	No	2630	2620	YY	No	No	No	No
25Year	2	0		having work	ART	Dichorionic	34	24	No	Diet	No	No	Middle school	161	78	20.8	3.82	209	111	0.336	7.67	4.03	34.7	215	36	7	154	Yes	No	Yes	Yes	34	143	95	545	35	cesarean section	preeclampsia，twin pregnancy	No	No	No	No	2290	2650	XY	No	No	Two babies had admission to NICU	No
25Year	1	0		having work	ART	Dichorionic	33	15	No	Diet	No	No	postgraduate	160	65	19.5	3.55	204	124	0.357	6.55	1.49	31.2	236	43	15	162	Yes	No	No	No					35	cesarean section	twin pregnancy	No	No	No	No	2200	1970	XY	No	No	Two babies had admission to NICU	No
31Year	1	0		no work	Spontaneous	Monochorionic	34	15	No	Diet	No	No	Junior college	156	69.5	22.1	3.98	251	119	0.35	5.33	2.13	33.7	313	49	11	146	Yes	No	No	No					35	cesarean section	twin pregnancy	No	No	No	No	2710	1950	YY	No	No	Two babies had admission to NICU	One baby had
32Year	1	0		having work	ART	Dichorionic	37	14.5	No	Diet	No	No	Undergraduate course	165	65.5	18.7	3.32	208	110	0.329	7.7	2.49	34.8	157	37	14	128	No	No	No	No					37	cesarean section	twin pregnancy	No	No	No	No	2500	2690	XX	No	No	Two babies had admission to NICU	No
39Year	3	0		having work	ART	Dichorionic	37	16.3	No	Diet	No	No	postgraduate	162	78	23.5	3.81	245	125	0.365	4.6	2.24	34	258	50	15	159	No	Yes	Yes	Yes	37	146	102	2933	37	cesarean section	twin pregnancy	Yes	Yes	No	No	2860	2280	XX	No	No	Two babies had admission to NICU	No
33Year	3	1	3	having work	Spontaneous	Dichorionic	36	17.5	No	Diet	No	No	Undergraduate course	164	78.5	22.6	3.8	239	115	0.347	8.45	3.48	36.4	237	62	9	146	No	No	No	No					36	cesarean section	twin pregnancy	No	No	No	No	2720	2690	XX	No	No	No	No
29Year	2	0		having work	Spontaneous	Dichorionic	37	14.9	No	Diet	No	No	postgraduate	153	60.9	19.6	3.51	227	102	0.306	6.69	2.6	33.2	243	50	13	148	No	No	No	No					37	cesarean section	twin pregnancy	No	No	No	No	2280	2740	XX	No	No	One baby had admission to NICU	No
34Year	1	0		having work	ART	Dichorionic	38	15.5	No	Diet	No	No	Undergraduate course	165	75.5	22	3.45	173	112	0.324	5.97	1.85	37.9	270	40	14	145	No	No	No	No					38	cesarean section	twin pregnancy	No	No	No	No	3100	2670	XY	No	No	No	No
32Year	2	0		having work	ART	Dichorionic	35	15.1	No	Diet	No	Yes	Junior college	168	60	15.5	3.42	230	120	0.339	10.02	2.1	35.2	194	38	10	150	Yes	No	Yes	Yes	36	159	92	550	36	cesarean section	twin pregnancy	No	No	No	No	2570	1800	XY	No	No	Two babies had admission to NICU	Two babies had
26Year	1	0		having work	Spontaneous	Dichorionic	36	17	No	Diet	No	No	Junior college	155	68	21.2	3.38	119	113	0.333	5.9	1.98	33.8	200	38	16	202	No	No	No	No					36	cesarean section	twin pregnancy	No	No	No	No	2720	2510	YY	Two babies had	No	Two babies had admission to NICU	No
33Year	1	0		having work	Spontaneous	Monochorionic	36	16	No	Diet	No	No	High school	160	63	18.3	3.66	233	123	0.361	6.61	1.39	35.8	184	38	11	147	No	No	No	No					36	cesarean section	twin pregnancy	No	No	No	No	2320	2360	YY	No	No	One baby had admission to NICU	No
30Year	3	1	2	having work	Spontaneous	Dichorionic	35	18	No	Diet	No	No	High school	166	78	21.7	3.37	259	106	0.315	5.7	4.15	33.4	224	43	8	142	No	No	No	No					35	cesarean section	twin pregnancy	No	No	No	No	2550	2300	XY	No	No	Two babies had admission to NICU	No
28Year	1	0		having work	ART	Dichorionic	35	11	No	Diet	No	No	Undergraduate course	160	62	19.9	4.16	225	126	0.381	8.32	3.21	35.4	268	30	36	149	Yes	No	No	No					35	cesarean section	twin pregnancy	No	No	No	No	2050	2280	XY	No	No	Two babies had admission to NICU	No
29Year	1	0		having work	ART	Dichorionic	37	11.4	No	Diet	No	No	Undergraduate course	157	75.4	25.9	4.21	191	134	0.388	6.83	3.94	37.1	357	45	18	143	No	No	Yes	No					37	cesarean section	twin pregnancy	No	No	No	No	2430	1980	YY	No	No	Two babies had admission to NICU	One baby had
30Year	1	0		having work	Spontaneous	Dichorionic	37	20.3	No	Diet	No	No	Junior college	157	73	21.3	3.69	224	119	0.346	6.81	1.72	35.6	234	40	13	161	Yes	No	No	No					37	cesarean section	twin pregnancy	No	No	No	No	2370	2000	YY	No	No	Two babies had admission to NICU	No
29Year	2	0		having work	Spontaneous	Monochorionic	36	20	No	Diet	No	No	Undergraduate course	163	75	20.7	3.34	157	114	0.332	6.1	1.68	26.1	236	54	16	134	Yes	No	No	No					37	cesarean section	twin pregnancy	No	No	No	No	2410	2570	XX	No	No	One baby had admission to NICU	No
35Year	2	1	10	having work	Spontaneous	Dichorionic	36	20.1	No	Diet	No	No	Undergraduate course	160	72.1	20.3	3.8	205	118	0.343	6.97	3.16	31.5	208	47	8	135	No	No	No	No					36	cesarean section	twin pregnancy，Scarred uterus	No	No	No	No	2950	2800	XY	No	No	One baby had admission to NICU	No
31Year	2	0		having work	ART	Dichorionic	35	15.5	No	Diet	No	Yes	Undergraduate course	160	73.5	22.6	3.19	230	91	0.278	6.47	2.12	33.2	303	43	11	199	Yes	No	No	No					35	cesarean section	twin pregnancy	No	No	No	No	2700	2650	XY	No	No	One baby had admission to NICU	No
31Year	2	1	3	having work	Spontaneous	Dichorionic	37	10.4	No	Diet	No	No	postgraduate	165	63	19.3	2.73	279	95	0.271	6.84	2.47	34	186	35	14	146	No	No	No	No					37	cesarean section	twin pregnancy	No	No	No	No	2270	2330	XX	No	No	One baby had admission to NICU	One baby had
30Year	3	1	4	having work	Spontaneous	Dichorionic	36	8.5	No	Diet	No	No	Junior college	157	76.5	23.5	3.4	303	106	0.309	11.94	2.72	30.8	237	42	10	144	Yes	No	Yes	No					36	cesarean section	twin pregnancy	No	No	No	No	2750	2920	XX	No	No	Two babies had admission to NICU	No
28Year	1	0		having work	Spontaneous	Monochorionic	37	17.5	No	Diet	No	Yes	Undergraduate course	160	67.5	19.5	3.48	252	109	0.327	8.15	4.19	36.9	310	50	21	134	No	No	No	No					37	cesarean section	twin pregnancy	No	No	No	No	2600	2590	XX	No	No	One baby had admission to NICU	No
32Year	2	1	4	having work	ART	Dichorionic	37	21	No	Diet	No	No	Junior college	155	63	17.4	4.04	180	131	0.389	6.15	2.26	35.2	219	40	16	172	No	No	No	No					37	cesarean section	twin pregnancy	No	No	No	No	2750	2750	XX	No	No	Two babies had admission to NICU	No
34Year	3	1	6	having work	Spontaneous	Dichorionic	35	14.5	No	Diet	No	No	Junior college	160	68.5	21	3.3	209	112	0.328	4.91	3.6	33.1	225	43	21	106	Yes	No	No	No					36	cesarean section	twin pregnancy	No	No	No	No	2510	2720	XY	No	No	One baby had admission to NICU	No
30Year	3	0		having work	Spontaneous	Monochorionic	36	22.1	No	Diet	No	No	Middle school	165	84	30.8	3.97	226	127	0.361	6.6	1.89	36.2	240	44	18	170	No	No	No	No					37	cesarean section	twin pregnancy	No	No	No	No	2460	2130	XX	No	No	One baby had admission to NICU	No
29Year	3	0		no work	ART	Dichorionic	35	17.4	No	Diet	No	Yes	High school	154	67.4	24.4	4.21	326	112	0.337	7.84	2.28	34.1	273	39	13	147	Yes	No	No	No					36	cesarean section	twin pregnancy	No	No	No	No	2600	2630	XY	No	No	One baby had admission to NICU	No
36Year	2	0		having work	ART	Dichorionic	37	9.5	No	Diet	No	No	Undergraduate course	170	78	23.7	4.29	215	128	0.378	7.73	3.58	35.6	258	43	9	184	No	No	No	No					37	cesarean section	twin pregnancy	No	No	No	No	2580	2750	XX	No	No	No	No
32Year	1	0		having work	ART	Dichorionic	35	17	No	Diet	No	No	Undergraduate course	161	75	22.3	3.93	173	128	0.375	7.29	5.43	31.9	247	37	8	182	Yes	No	Yes	No					35	cesarean section	twin pregnancy，ICP	No	No	No	No	2830	2290	XY	No	No	One baby had admission to NICU	No
33Year	2	0		having work	Spontaneous	Monochorionic	36	13.7	No	Diet	No	No	postgraduate	158	62.7	19.6	3.48	199	109	0.329	5.99	2.47	35.2	289	34	8	144	No	No	No	No					37	cesarean section	twin pregnancy	No	No	No	No	2780	3010	YY	No	No	No	No
40Year	2	1	14	having work	Spontaneous	Monochorionic	36	8	No	Diet	No	No	High school	152	60	22.5	2.89	104	94	0.292	7.58	2.52	37.1	331	49	20	193	No	No	No	No					36	cesarean section	twin pregnancy	No	No	No	No	2600	2270	YY	No	No	One baby had admission to NICU	One baby had
35Year	1	0		having work	ART	Dichorionic	36	11.5	No	Diet	No	No	Junior college	169	63.5	18.2	3.45	139	110	0.329	5.89	2.08	37.5	175	39	27	167	No	No	No	No					37	cesarean section	twin pregnancy	No	No	No	No	2640	2920	XY	No	No	No	No
29Year	1	0		having work	Spontaneous	Monochorionic	33	14	No	Diet	No	No	Master	162	59	17.1	3.77	265	122	0.347	6.14	1.92	31.3	279	47	12	153	Yes	Yes	No	No					33	cesarean section	twin pregnancy	No	No	No	No	1800	2020	YY	No	No	Two babies had admission to NICU	No
33Year	5	1	9	having work	ART	Dichorionic	35	14	No	Diet	No	Yes	Undergraduate course	158	70	22.4	3.68	193	117	0.343	5.3	3.53	33	160	33	20	160	Yes	No	No	No					35	cesarean section	twin pregnancy	No	No	No	No	2510	2580	XX	No	No	One baby had admission to NICU	One baby had
35Year	1	0		having work	ART	Dichorionic	37	6.5	No	Diet	No	No	Undergraduate course	163	59.5	19.9	3.6	207	105	0.315	8.11	1.69	33	252	46	15	138	No	No	No	No					37	cesarean section	twin pregnancy	No	No	No	No	2550	2340	XY	No	No	No	No
34Year	3	0		having work	ART	Dichorionic	37	18.4	No	Diet	No	No	Junior college	165	78.4	22	3.28	238	105	0.311	5.36	2.99	32.9	246	44	8	128	No	No	No	No					37	cesarean section	twin pregnancy	Yes	No	No	No	2570	2760	XY	No	No	Two babies had admission to NICU	No
30Year	1	0		having work	ART	Dichorionic	37	21.6	No	Diet	No	No	High school	162	81.6	22.8	3.11	253	102	0.303	6.13	1.74	33.1	222	44	12	167	No	No	No	No					37	cesarean section	twin pregnancy	No	No	No	No	2410	3000	YY	No	No	No	No
30Year	1	0		having work	ART	Dichorionic	36	10	No	Diet	No	No	Undergraduate course	153	73	26.9	3.91	312	121	0.355	8.92	4.08	32.9	225	41	9	138	No	No	No	No					36	cesarean section	twin pregnancy	No	No	No	No	3090	1930	YY	No	No	One baby had admission to NICU	No
36Year	2	0		having work	ART	Dichorionic	37	14.2	No	Diet	No	No	Undergraduate course	162	69.2	20.9	3.28	148	106	0.309	5.36	3.31	32.1	240	34	13	220	No	No	No	No					37	cesarean section	twin pregnancy	No	No	No	No	3200	2730	YY	No	No	No	No
33Year	2	0		having work	ART	Dichorionic	37	13.7	No	Diet	No	No	Junior college	154	67.7	22.1	3.3	216	103	0.308	7.29	3.11	34.4	189	37	8	168	No	No	No	No					37	cesarean section	twin pregnancy	No	No	No	No	2640	2840	XY	No	No	No	No
30Year	2	1	3	having work	Spontaneous	Dichorionic	36	18.4	No	Diet	No	No	postgraduate	168	79.1	21.7	3.69	172	123	0.365	6.62	1.89	35.3	280	54	7	163	No	No	No	No					37	cesarean section	twin pregnancy	Yes	No	No	No	3060	3050	YY	No	No	Two babies had admission to NICU	No
30Year	2	0		having work	ART	Dichorionic	37	14.4	No	Diet	No	No	Undergraduate course	160	69.3	21.4	3.54	214	122	0.354	5.53	2.03	36.6	270	46	11	153	No	No	No	No					37	cesarean section	twin pregnancy	No	No	No	No	2400	2700	XX	No	No	No	No
35Year	3	1	5	having work	Spontaneous	Monochorionic	37	17	No	Diet	No	No	Undergraduate course	163	70	19.9	3.35	132	109	0.325	8.36	2.36	30.4	226	40	17	158	No	No	No	No					37	cesarean section	twin pregnancy	No	No	No	No	3030	3260	YY	No	No	No	No
37Year	5	2	7	no work	ART	Monochorionic	34	22.6	No	Diet	No	No	High school	159	80.1	22.7	3.31	198	114	0.321	8.38	3.79	34.6	344	41	10	138	Yes	No	No	No					35	cesarean section	twin pregnancy	No	No	No	No	2600	2430	YY	No	No	Two babies had admission to NICU	No
29Year	2	0		having work	ART	Dichorionic	37	17	No	Diet	No	No	Undergraduate course	170	77	20.7	3.43	299	103	0.304	8.79	2.47	33.9	308	55	17	188	No	No	No	No					37	cesarean section	twin pregnancy	No	No	No	No	3650	2400	XY	No	No	No	No
32Year	2	1	3	having work	Spontaneous	Monochorionic	36	19.6	No	Diet	No	No	Undergraduate course	168	76.6	20.1	3.59	235	109	0.323	7.55	2.34	30.2	246	35	10	165	No	No	No	No					36	cesarean section	twin pregnancy	No	No	Yes	No	2350	2380	YY	No	No	Two babies had admission to NICU	No
36Year	3	1	6	having work	Spontaneous	Dichorionic	37	21.1	No	Diet	No	No	Undergraduate course	163	85.1	24	3.45	234	105	0.318	5.52	4.68	34.5	198	47	10	118	No	No	No	No					38	cesarean section	twin pregnancy	No	No	No	No	2800	2810	XX	No	No	No	No
28Year	1	0		having work	Spontaneous	Monochorionic	34	23	No	Diet	No	No	Undergraduate course	155	78	22.8	3.82	297	120	0.359	6.09	3.5	40	297	45	15	190	Yes	No	No	No					34	cesarean section	Fetal arrhythmia	No	No	No	No	2380	2790	XX	No	No	Two babies had admission to NICU	One baby had
32Year	2	0		having work	Spontaneous	Monochorionic	36	16	No	Diet	No	No	Undergraduate course	165	70	19.8	3.68	172	116	0.341	6.37	3.81	35.5	281	32	13	164	No	No	No	No					36	cesarean section	twin pregnancy	No	No	No	No	2910	2850	YY	No	No	Two babies had admission to NICU	One baby had
27Year	1	0		having work	ART	Dichorionic	36	14	No	Diet	No	No	Undergraduate course	160	58	17.1	3.24	211	108	0.325	5.74	1.65	35.4	224	39	9	137	No	No	No	No					36	cesarean section	twin pregnancy	No	No	No	No	2600	2320	XY	No	No	Two babies had admission to NICU	No
34Year	1	0		having work	ART	Dichorionic	37	11.6	No	Diet	No	No	Junior college	166	89.3	28.1	4.52	257	119	0.364	5.92	2.27	35.6	250	38	13	163	No	No	No	No					37	cesarean section	twin pregnancy	Yes	Yes	No	No	3040	3000	YY	One baby had	No	Two babies had admission to NICU	One baby had
33Year	1	0		no work	Spontaneous	Dichorionic	36	18	No	Diet	No	No	Junior college	168	79	21.6	3.34	231	108	0.318	5.3	2.42	34.5	226	45	11	133	Yes	No	No	No					36	cesarean section	twin pregnancy	No	No	No	No	3040	2510	YY	No	No	One baby had admission to NICU	One baby had
37Year	2	0		no work	ART	Dichorionic	35	10	No	Diet	No	No	Undergraduate course	158	56	18.4	3.41	284	112	0.332	7.06	1.89	29.9	303	51	17	167	Yes	No	No	No					36	cesarean section	twin pregnancy	No	No	No	No	2060	1770	XX	No	No	Two babies had admission to NICU	No
29Year	1	0		having work	Spontaneous	Monochorionic	35	12.5	No	Diet	No	No	Undergraduate course	153	63.5	21.7	3.63	204	114	0.33	5.24	4.8	34.3	262	35	9	127	Yes	No	No	No					35	cesarean section	twin pregnancy	No	No	No	No	2090	2110	XX	No	No	Two babies had admission to NICU	No
30Year	4	0		no work	ART	Dichorionic	36	26	No	Diet	No	No	High school	158	72	18.4	3.81	255	127	0.374	6.83	3.14	33.1	310	40	32	176	No	Yes	No	No					37	cesarean section	twin pregnancy	No	No	No	No	2650	2380	XX	No	No	Two babies had admission to NICU	No
33Year	1	0		having work	Spontaneous	Dichorionic	36	19	No	Diet	No	No	Undergraduate course	163	80	22.9	3.51	216	112	0.336	7.54	2.26	37.1	224	41	10	172	No	No	No	No					37	cesarean section	twin pregnancy	No	No	No	No	2830	3160	XY	No	No	No	No
28Year	1	0		having work	Spontaneous	Monochorionic	36	17.8	No	Diet	No	No	Undergraduate course	159	66.8	19.3	3.39	213	98	0.291	5.31	3.45	31.8	211	40	27	143	Yes	No	No	No					36	cesarean section	twin pregnancy	No	No	No	No	2630	2370	XX	No	No	One baby had admission to NICU	No
33Year	1	0		having work	ART	Dichorionic	35	22	No	Diet	No	Yes	High school	157	75	21.5	3.76	198	118	0.35	6.83	3.06	29.5	223	39	11	157	Yes	Yes	No	No					35	cesarean section	twin pregnancy	No	No	Yes	No	2230	2290	XY	No	No	Two babies had admission to NICU	One baby had
38Year	2	1	12	having work	ART	Dichorionic	32	9	No	Diet	No	No	Undergraduate course	155	66.5	24.1	3.56	270	118	0.352	6.59	3.27	34.2	265	43	4	184	Yes	No	No	No					33	cesarean section	twin pregnancy	No	No	No	No	1820	1830	XY	No	No	Two babies had admission to NICU	No
31Year	1	0		having work	ART	Dichorionic	37	12	No	Diet	No	Yes	Undergraduate course	157	58	18.6	3.52	245	114	0.327	6.78	1.87	31.5	249	52	13	157	No	No	No	No					37	cesarean section	twin pregnancy	No	No	No	No	2510	1750	XY	No	No	One baby had admission to NICU	No
31Year	3	0		no work	ART	Dichorionic	36	18.7	No	Diet	No	No	High school	167	78	21.2	3.79	222	118	0.342	6.41	2.28	36.4	281	50	19	163	No	No	Yes	No					37	cesarean section	twin pregnancy	No	No	No	No	2540	2130	XX	No	No	One baby had admission to NICU	No
31Year	1	0		having work	ART	Dichorionic	34	7.6	No	Diet	No	No	Undergraduate course	163	66.6	22.2	3.35	187	108	0.321	7.78	2.74	33.7	205	36	8	124	Yes	No	No	No					36	cesarean section	twin pregnancy	No	No	No	No	2260	2540	XY	No	No	One baby had admission to NICU	One baby had
29Year	1	0		having work	Spontaneous	Monochorionic	36	15.5	No	Diet	No	No	Undergraduate course	173	67	22.3	3.75	165	129	0.363	5.9	2.16	35.1	267	48	19	145	No	No	No	No					36	cesarean section	twin pregnancy	No	No	No	No	2540	2320	XX	No	No	Two babies had admission to NICU	No
26Year	1	0		having work	Spontaneous	Monochorionic	35	24	No	Diet	No	Yes	Junior college	160	78	21	3.56	177	105	0.318	7.43	1.85	36	233	38	11	177	No	No	No	No					35	cesarean section	twin pregnancy	No	No	No	No	2150	2340	XX	No	No	Two babies had admission to NICU	One baby had
29Year	3	0		having work	ART	Dichorionic	35	14	No	Diet	No	No	Junior college	164	61	17.4	3.66	297	116	0.344	6.44	1.72	36.1	196	40	9	158	Yes	No	No	No					36	cesarean section	twin pregnancy	No	No	No	No	2520	2100	XX	No	No	One baby had admission to NICU	No
32Year	1	0		no work	ART	Dichorionic	36	16	No	Diet	No	No	Junior college	159	80	21	3.44	270	88	0.273	7.68	2.81	33.9	201	34	7	186	No	No	No	No					36	cesarean section	twin pregnancy	No	No	No	No	2580	2530	XY	No	No	No	No
29Year	2	0		having work	ART	Monochorionic	35	19	No	Diet	No	No	Undergraduate course	167	70	18.2	3.65	180	113	0.322	7.67	2.03	34	213	39	24	200	Yes	No	No	No					35	cesarean section	twin pregnancy	No	No	No	No	2470	2270	XX	No	No	Two babies had admission to NICU	Two babies had
32Year	1	0		having work	ART	Dichorionic	36	16.5	No	Diet	No	No	Undergraduate course	166	72	20.1	3.54	210	120	0.37	7.45	2.93	37.7	166	72	23	181	No	No	No	No					37	cesarean section	twin pregnancy	No	No	No	No	2850	2560	XY	No	No	No	No
25Year	3	1	2	having work	Spontaneous	Dichorionic	39	12.5	No	Diet	No	No	High school	153	60	20.2	3.66	283	104	0.326	7.63	3.06	32.7	246	58	7	163	No	No	No	No					39	cesarean section	twin pregnancy	No	No	No	No	2870	2700	YY	No	No	No	No
30Year	2	0		no work	ART	Dichorionic	36	10	No	Diet	No	No	Junior college	160	63	20.7	3.05	179	98	0.297	7.23	2.58	33.1	276	41	10	132	No	Yes	No	No					37	cesarean section	twin pregnancy	No	No	No	No	2700	2500	YY	No	No	No	No
29Year	2	0		no work	ART	Dichorionic	35	24	No	Diet	No	No	Undergraduate course	163	76	19.5	3.64	249	100	0.311	7.14	2.13	34.1	220	43	11	144	Yes	No	No	No					35	cesarean section	twin pregnancy	No	No	No	No	2670	2620	XY	No	No	Two babies had admission to NICU	No
32Year	1	0		no work	ART	Dichorionic	35	20	No	Diet	No	No	postgraduate	175	78	18.9	3.93	205	116	0.356	6.86	2.02	32.5	193	32	14	128	Yes	Yes	No	No					35	cesarean section	twin pregnancy	No	No	No	No	2850	2570	YY	No	No	Two babies had admission to NICU	No
34Year	4	2	7	having work	ART	Dichorionic	35	18.8	No	Diet	No	No	Junior college	163	71.8	19.9	3.07	196	101	0.317	5.3	3.77	30	192	30	9	157	Yes	No	No	No					36	cesarean section	twin pregnancy	No	No	No	No	2750	3110	XY	No	No	No	No
30Year	1	0		having work	ART	Dichorionic	37	13	No	Diet	No	No	Undergraduate course	160	70	22.2	3.45	194	104	0.318	5.68	2.27	33.4	222	28	14		No	No	No	No					37	cesarean section	twin pregnancy	No	No	No	No	2780	2220	XX	No	No	No	No
34Year	1	0		having work	Spontaneous	Monochorionic	37	16	No	Diet	No	Yes	Undergraduate course	165	65	17.9	3.75	166	123	0.36	5.67	2.75	35.1	226	33	13	137	No	No	No	No					37	cesarean section	twin pregnancy	No	No	No	No	2610	2160	YY	No	No	Two babies had admission to NICU	One baby had
28Year	2	0		having work	ART	Dichorionic	37	8	No	Diet	No	No	Undergraduate course	170	71	21.7	3.36	238	109	0.329	5.31	2.29	35.9	241	27	13	123	No	No	No	No					37	cesarean section	twin pregnancy	No	No	No	No	2760	2420	XX	No	No	No	No
27Year	1	0		having work	Spontaneous	Dichorionic	35	23	No	Diet	No	No	Undergraduate course	160	83	23.4	3.81	233	118	0.364	7.77	3.22	32.8	231	34	12	200	No	No	No	No					35	cesarean section	twin pregnancy	No	No	No	No	2360	2540	XX	No	No	Two babies had admission to NICU	No
28Year	2	1	4	no work	Spontaneous	Monochorionic	36	8.5	No	Diet	No	Yes	Middle school	158	63.5	22	3.28	241	103	0.311	7.23	2.19	31.9	216	33	13	180	No	No	No	No					36	cesarean section	twin pregnancy	No	No	No	No	2190	1920	YY	No	No	Two babies had admission to NICU	One baby had
36Year	1	0		having work	ART	Dichorionic	35	19.3	No	Diet	No	No	Undergraduate course	162	61.3	16	3.66	205	118	0.356	6.23	2.68	30.3	239	38	10	185	Yes	No	No	No					35	cesarean section	twin pregnancy	No	No	No	No	2580	2520	XY	No	No	One baby had admission to NICU	One baby had
27Year	1	0		no work	Spontaneous	Monochorionic	37	24	No	Diet	No	No	polytechnic school	168	77	18.7	3.71	185	110	0.334	7.25	1.6	36.7	224	35	23	169	No	No	No	No					37	cesarean section	twin pregnancy	No	No	No	No	2840	2640	YY	No	No	One baby had admission to NICU	One baby had
38Year	5	2	10	having work	Spontaneous	Monochorionic	36	17.5	No	Diet	No	Yes	Junior college	155	70	21.8	3.46	176	114	0.34	6.62	2.23	33.6	249	42	14	160	No	No	No	No					36	cesarean section	twin pregnancy	No	No	No	No	2890	2860	YY	No	No	Two babies had admission to NICU	No
29Year	1	0		having work	ART	Dichorionic	34	10.5	No	Diet	No	No	Junior college	165	58.5	17.6	3.54	235	108	0.328	6.48	2.41	34.5	207	39	9	139	Yes	No	No	No					36	cesarean section	twin pregnancy	No	No	No	No	2100	1770	XX	No	No	Two babies had admission to NICU	Two babies had
30Year	1	0		having work	ART	Dichorionic	37	15	No	Diet	No	No	Undergraduate course	161	90	28.9	3.45	262	103	0.308	7.79	3.5	31.7	211	45	7	152	No	No	No	No					37	cesarean section	twin pregnancy	No	No	No	No	2960	2800	XY	No	No	No	No
35Year	2	1	5	having work	ART	Dichorionic	36	17.9	No	Diet	No	No	Undergraduate course	171	74.2	19.2	3.84	296	116	0.353	7.81	4.43	32.8	234	44	21	136	No	No	No	No					37	cesarean section	twin pregnancy	No	No	No	No	2850	2550	XX	No	No	No	No
31Year	2	0		having work	Spontaneous	Dichorionic	36	15	No	Diet	No	No	Undergraduate course	163	75	22.5	3.73	266	121	0.357	7.5	3.31	35.6	211	39	8	213	Yes	No	No	No					36	cesarean section	twin pregnancy	No	No	No	No	2480	2710	YY	No	No	Two babies had admission to NICU	No
36Year	4	2	4	no work	Spontaneous	Dichorionic	36	16.9	No	Diet	No	No	Middle school	150	63	20.4	3.5	165	114	0.335	4.62	2.59	34.8	215	31	6	176	No	No	No	No					37	cesarean section	twin pregnancy	No	No	No	No	2540	2570	XX	No	No	Two babies had admission to NICU	No
37Year	2	1	7	no work	ART	Dichorionic	33	14	No	Diet	No	No	Middle school	155	74	24.9	4.05	298	109	0.34	7.75	7.5	34.8	253	41	8	148	Yes	No	Yes	No					34	cesarean section	twin pregnancy	No	No	No	No	2030	2060	XY	No	No	Two babies had admission to NICU	No
35Year	4	1	3	no work	ART	Dichorionic	34	17	No	Diet	No	No	Junior college	168	74	20.1	3.73	246	116	0.35	8.74	2.31	35.6	192	37	13	124	Yes	No	No	No					34	cesarean section	twin pregnancy	No	No	No	No	1790	2220	XX	No	No	Two babies had admission to NICU	No
31Year	1	0		having work	Spontaneous	Dichorionic	36	18.3	No	Diet	No	No	Undergraduate course	168	83	22.9	3.92	230	116	0.356	5.7	1.92	33.8	116	34	11	159	No	No	No	No					36	cesarean section	twin pregnancy，Severe ICP	No	No	No	No	3440	2000	XY	No	No	Two babies had admission to NICU	One baby had
31Year	1	0		having work	ART	Dichorionic	36	9.5	No	Diet	No	Yes	Undergraduate course	158	64.5	22	3.16	198	104	0.311	6.47	2.73	37.9	264	51	8	72	No	Yes	No	No					37	cesarean section	twin pregnancy	No	No	No	No	1960	2050	YY	No	No	Two babies had admission to NICU	One baby had
30Year	1	0		having work	Spontaneous	Monochorionic	32	5	No	Diet	No	Yes	Junior college	162	63	22.1	3.65	181	113	0.341	4.53	1.9	34.8	215	43	9	173	Yes	No	No	No					32	cesarean section	TTTS	No	No	No	No	1420	1790	XX	One baby had	No	Two babies had admission to NICU	No
31Year	1	0		having work	Spontaneous	Monochorionic	34	13.5	No	Diet	No	No	postgraduate	160	63.5	19.5	3.25	143	109	0.327	4.93	2.67	33.9	225	41	15	149	No	No	No	No					34	cesarean section	twin pregnancy	No	No	No	No	1930	2230	YY	No	No	Two babies had admission to NICU	No
27Year	1	0		having work	Spontaneous	Monochorionic	32	15	No	Diet	No	No	Junior college	163	65	18.9	3.03	151	103	0.289	4.83	3.61	34.3	243	43	9	143	Yes	No	No	No					32	cesarean section	twin pregnancy	No	No	No	No	1740	1550	XX	No	No	Two babies had admission to NICU	No
32Year	1	0		having work	Spontaneous	Dichorionic	33	12.1	No	Diet	No	Yes	Undergraduate course	160	68.1	26.6	3.08	216	97	0.286	6.46	3.03	35.7	182	34	37	138	Yes	No	No	No					36	cesarean section	twin pregnancy	Yes	No	No	No	2510	2370	XY	No	No	No	No
33Year	2	0		having work	ART	Dichorionic	37	16	No	Diet	No	Yes	High school	165	75.1	21.6	3.91	177	128	0.374	7	4.97	35.3	323	43	15	157	No	Yes	No	No					37	cesarean section	twin pregnancy	No	No	No	No	3100	2900	XY	No	No	One baby had admission to NICU	No
34Year	2	1	4	no work	ART	Dichorionic	35	18	No	Diet	No	No	High school	158	68	20	3.5	283	101	0.304	7.47	1.25	31.1	123	41	13	176	No	Yes	No	No					35	cesarean section	twin pregnancy	No	No	No	No	2640	2580	XY	No	No	One baby had admission to NICU	No
30Year	3	1	7	no work	Spontaneous	Monochorionic	36	20	No	Diet	No	No	High school	162	70	19	3.91	206	119	0.353	6.29	1.98	33.1	193	37	11	140	No	No	No	No					36	cesarean section	twin pregnancy	No	No	No	No	2090	2540	XX	No	No	Two babies had admission to NICU	No
35Year	4	1	10	having work	Spontaneous	Dichorionic	36	14.1	No	Diet	No	No	High school	156	74.4	24.7	3.64	206	121	0.35	7.15	2.58	38.2	271	40	14	144	No	No	No	No					37	cesarean section	twin pregnancy	No	No	No	No	2610	2400	XY	No	No	No	No
26Year	4	0		no work	ART	Dichorionic	32	11.8	No	Diet	No	No	Junior college	158	64.8	21.2	3.15	170	100	0.299	4.96	3.43	35.8	496	54	24	188	Yes	No	No	No					32	cesarean section	twin pregnancy	No	No	No	No	1940	860	XY	One baby had	No	Two babies had admission to NICU	No
36Year	1	0		having work	ART	Dichorionic	37	18	No	Diet	No	No	Undergraduate course	163	70	19.5	3.45	170	106	0.315	6.23	1.9	34.4	202	42	10	145	No	No	Yes	Yes	37	153	87	322	37	cesarean section	twin pregnancy	No	No	No	No	2760	2880	YY	No	No	One baby had admission to NICU	No
40Year	4	1	13	no work	Spontaneous	Monochorionic	37	26.2	No	Diet	No	No	Middle school	170	84.7	20.2	3.94	196	116	0.35	5.64	4.05	32.1	336	41	35	162	No	No	No	No					37	cesarean section	twin pregnancy	No	No	No	No	2770	2700	YY	No	No	No	No
29Year	1	0		having work	Spontaneous	Dichorionic	37	21.8	No	Diet	No	Yes	Master	164	73.8	19.3	3.28	299	105	0.307	8.39	1.93	39.3	331	39	20	191	No	No	No	No					37	cesarean section	twin pregnancy	No	No	No	No	2840	2810	XX	No	No	No	No
35Year	2	1	3	having work	ART	Dichorionic	36	10.5	No	Diet	No	Yes	Undergraduate course	164	76.5	24.5	3.2	202	108	0.316	5.63	2.61	34.4	254	43	8	155	Yes	No	No	No					36	cesarean section	twin pregnancy	No	No	No	No	2760	2900	XX	No	No	No	No
36Year	1	0		having work	ART	Dichorionic	35	19.8	No	Diet	No	Yes	Junior college	160	73.3	21.2	3.25	166	107	0.328	7.08	4.76	35.5	226	60	17	141	Yes	No	Yes	Yes	35	145	77	649	36	cesarean section	twin pregnancy	No	No	No	No	2210	2250	XX	No	No	Two babies had admission to NICU	No
29Year	1	0		having work	Spontaneous	Monochorionic	35	17	No	Diet	No	Yes	Undergraduate course	160	69	20.3	3.83	216	112	0.35	8.93	2.42	32	246	43	9	142	Yes	No	No	No					36	cesarean section	twin pregnancy	No	No	No	No	2520	2310	XX	No	No	One baby had admission to NICU	No
33Year	3	1	8	no work	Spontaneous	Monochorionic	35	17.4	No	Diet	No	Yes	Junior college	158	63.4	18.4	4.25	255	121	0.379	7.78	2.62	34.1	240	54	13		No	No	No	No					35	cesarean section	twin pregnancy	No	No	No	No	2570	2480	XX	No	No	One baby had admission to NICU	No
27Year	2	0		having work	Spontaneous	Monochorionic	32	23	No	Diet	No	No	Junior college	170	80	19.7	4.04	265	110	0.351	6.59	3.25	33.4	200	50	4	137	Yes	No	Yes	No					32	vaginal delivery		No	No	No	No	1860	1910	XX	No	No	Two babies had admission to NICU	No
36Year	2	0		having work	ART	Dichorionic	36	20.1	No	Diet	No	No	Junior college	163	76.1	21	3.7	243	129	0.369	6.99	3.77	39.2	190	59	15	167	Yes	No	No	No					36	cesarean section	twin pregnancy	No	No	No	No	2210	2500	XY	No	No	Two babies had admission to NICU	No
30Year	6	0		having work	ART	Dichorionic	35	17	No	Diet	Antiphospholipid antibody syndrome	No	Undergraduate course	154	81	26.9	3.76	230	110	0.346	5.6	3.24	34.2	275	50	5	161	No	Yes	No	No					36	cesarean section	twin pregnancy	No	No	No	No	2580	2220	XY	No	No	Two babies had admission to NICU	No
36Year	2	1	7	having work	ART	Dichorionic	36	19	No	Diet	No	No	Undergraduate course	160	67	17.9	3.61	280	106	0.323	7.86	3.92	33.4	261	56	10	179	No	No	No	No					36	vaginal delivery		Yes	No	No	No	2530	2710	XX	No	No	No	No
29Year	1	0		having work	Spontaneous	Dichorionic	33	8	No	Diet	No	No	Undergraduate course	166	70	22.4	3.49	151	111	0.331	5.48	1.66	32	241	57	9	158	Yes	No	No	No					34	cesarean section	twin pregnancy	No	No	No	No	1940	1950	YY	No	No	Two babies had admission to NICU	No
28Year	1	0		having work	Spontaneous	Monochorionic	34	18	No	Diet	No	No	Undergraduate course	156	61	17.6	3.73	237	118	0.364	9.16	2.05	36	189	49	28	152	Yes	No	No	No					34	cesarean section	twin pregnancy	No	No	Yes	No	2150	2260	XX	No	No	Two babies had admission to NICU	No
27Year	2	0		having work	ART	Dichorionic	36	19.5	No	Diet	No	No	Junior college	158	70	20.2	3.53	209	107	0.332	8.36	4.23	29.9	228	48	14	135	Yes	No	No	No					36	cesarean section	twin pregnancy	No	No	No	No	2510	2420	XY	No	No	Two babies had admission to NICU	No
28Year	1	0		having work	ART	Dichorionic	36	18	No	Diet	No	Yes	Undergraduate course	168	81	22.3	3.53	179	120	0.351	6.92	2.03	33.9	224	53	21	175	No	No	No	No					36	cesarean section	twin pregnancy	Yes	Yes	No	No	2800	2650	YY	No	No	One baby had admission to NICU	No
32Year	3	1	5	having work	Spontaneous	Monochorionic	36	26.1	No	Diet	No	No	Undergraduate course	155	73.1	19.5	3.64	134	120	0.353	5.89	2.95	33.3	189	54	11	167	No	No	No	No					36	cesarean section	twin pregnancy	No	No	No	No	3000	1910	XX	No	No	Two babies had admission to NICU	One baby had
35Year	2	0		having work	ART	Dichorionic	31	6	No	Diet	No	No	Undergraduate course	157	72	26.7	4.01	298	121	0.363	4.73	5.59	34	314	56	10	176	Yes	No	No	No					32	cesarean section	Fetal distress	No	No	No	No	1680	1460	XX	Two babies had	No	Two babies had admission to NICU	No
24Year	4	1	3	having work	Spontaneous	Dichorionic	37	26	No	Diet	No	No	High school	166	76	18.1	3.56	292	100	0.306	7.24	3.12	31.8	209	42	13	147	Yes	No	No	No					37	cesarean section	twin pregnancy	No	No	Yes	No	2800	2520	XX	No	No	No	No
28Year	2	0		having work	ART	Dichorionic	35	15	No	Diet	No	Yes	Undergraduate course	170	85	24.2	3.6	258	114	0.335	4.99	2.41	37.4	243	53	11	141	No	No	No	No					35	cesarean section	twin pregnancy	No	No	No	No	2320	2060	XY	No	No	Two babies had admission to NICU	One baby had
35Year	1	0		having work	ART	Dichorionic	37	11.5	No	Diet	No	Yes	Undergraduate course	155	60.5	20.3	3.6	184	119	0.349	9.51	2.4	28.5	210	46	20	178	No	No	Yes	Yes	37	158	90	372	37	cesarean section	twin pregnancy	No	No	No	No	2510	2440	XY	No	No	Two babies had admission to NICU	No
[truncated: 7 more columns]
