# Supplementary material for: The impact of maternal serum biomarkers on maternal and neonatal outcomes in twin pregnancies: a retrospective cohort study conducted at a tertiary hospital
Source: PeerJ journal article supplement (doi:10.7717/peerj.18415), 2024-10-28
Supplement: Table_S1.pdf [file Table_S1.pdf]

Table S1. Secondary outcomes of the participants

|                                            | NC (n=660) | EOPE (n=19) | LOPE (n=57) | LOPE vs.<br>EOPE | EOPE vs.<br>NC | LOPE vs.<br>NC | P-value |
|--------------------------------------------|------------|-------------|-------------|------------------|----------------|----------------|---------|
| <b>Maternal outcomes</b>                   |            |             |             |                  |                |                |         |
| Postpartum hemorrhage or blood transfusion | 30 (4.5)   | 3 (15.8)    | 7 (12.3)    | 0.704            | 0.060          | 0.021          | 0.007   |
| Admission to intensive care unit           | 10 (1.5)   | 4 (21.1)    | 4 (7.0)     | 0.102            | <0.001         | 0.020          | <0.001  |
| Chorioamnionitis or postpartum infection   | 68 (10.3)  | 5 (26.3)    | 11 (19.3)   | 0.528            | 0.044          | 0.037          | 0.014   |
| <b>Neonatal outcomes</b>                   |            |             |             |                  |                |                |         |
| Neonatal asphyxia                          | 35 (2.7)   | 7 (18.4)    | 1 (0.9)     | <0.001           | <0.001         | 0.356          | <0.001  |
| Ventilator support                         | 112 (8.5)  | 13 (34.2)   | 2 (1.8)     | <0.001           | <0.001         | 0.011          | <0.001  |
| Neonatal hypoglycemia                      | 144 (10.9) | 9 (23.7)    | 19 (16.7)   | 0.334            | 0.031          | 0.063          | 0.013   |
| Sepsis                                     | 75 (5.7)   | 7 (18.4)    | 6 (5.3)     | 0.019            | 0.006          | 0.853          | 0.014   |
| Blood transfusion                          | 50 (3.8)   | 7 (18.4)    | 2 (1.8)     | 0.001            | 0.001          | 0.429          | 0.001   |
| Hemorrhage                                 | 14 (1.1)   | 1 (2.6)     | 0 (0.0)     | 0.250            | 0.348          | 0.619          | 0.297   |

Data are presented as n (%). Abbreviations: NC, Normal control; EOPE, early-onset preeclampsia; LOPE, late-onset preeclampsia.
