# Supplementary material for: The impact of maternal serum biomarkers on maternal and neonatal outcomes in twin pregnancies: a retrospective cohort study conducted at a tertiary hospital
Source: PeerJ journal article supplement (doi:10.7717/peerj.18415), 2024-10-28
Supplement: TableS2.docx [file TableS2.docx]

Table S2. Independent risk factors for the development of composite maternal outcome

| Characteristics | Unadjusted OR (95%CI) | P | Adjusted OR (95%CI) | P |
| --- | --- | --- | --- | --- |
| Maternal age (year) | 1.013 (0.963-1.067) | 0.609 | 0.989 (0.934-1.047) | 0.709 |
| Mode of conception |  | 0.022 |  | 0.087 |
| Spontaneous | Ref |  | Ref |  |
| ART | 1.591 (1.070-2.365) |  | 1.429(0.941-2.169) | 0.094 |
| Red blood cell (10^12/L) | 2.243 (1.242-4.049) | 0.007 | 2.247(1.229-4.107) | 0.009 |
| Hematocrit*10 | 1.965 (1.013-3.814) | 0.046 | 0.665 (0.213-2.073) | 0.481 |
| Lactate dehydrogenase (U/L) | 1.008 (1.000-1.016) | 0.049 | 1.006 (0.998-1.015) | 0.139 |
