# Supplementary figures and images for: The impact of maternal serum biomarkers on maternal and neonatal outcomes in twin pregnancies: a retrospective cohort study conducted at a tertiary hospital
Source: PeerJ journal article supplement (doi:10.7717/peerj.18415), 2024-10-28

Fig. S1. The calibration plot for the nomogram

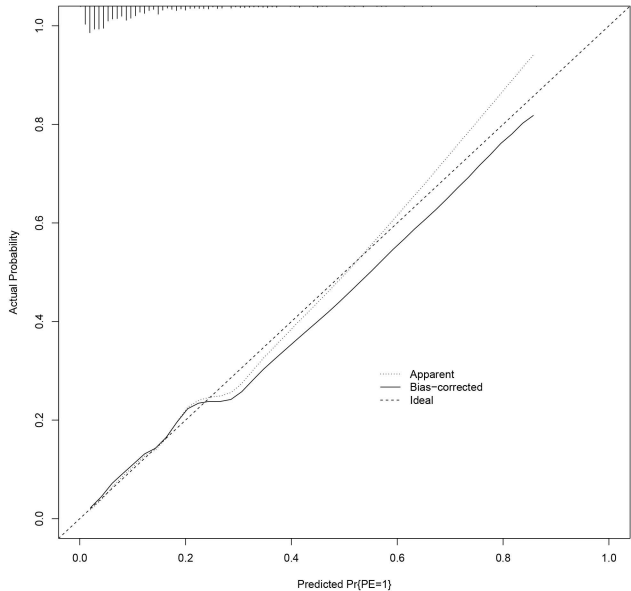

Supplement: FigS1.pdf [file FigS1.pdf]

Fig. S3. ROC curve for prediction of adverse maternal events

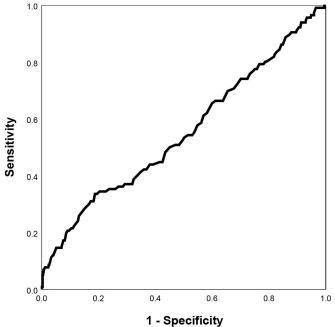

Supplement: FigS3.pdf [file FigS3.pdf]
